1

2

3

4

## **Rampant loss of social traits during domestication of a wild *Bacillus subtilis***

5

6

7

Hugo C. Barreto<sup>1,2</sup>, Tiago N. Cordeiro<sup>2</sup>, Adriano O. Henriques<sup>2\*</sup>, and Isabel Gordo<sup>1\*</sup>

8

9

10

11

<sup>1</sup>Instituto Gulbenkian de Ciências, Oeiras, Portugal

12

<sup>2</sup>Instituto de Tecnologia Química e Biológica António Xavier, Universidade Nova de Lisboa, Oeiras, Portugal

13

14

15

16

17

**\* Corresponding author**

18

E-mail: [igordo@igc.gulbenkian.pt](mailto:igordo@igc.gulbenkian.pt) (I.G.), [aoh@itqb.unl.pt](mailto:aoh@itqb.unl.pt) (A.O.H.)

## 19 **Abstract**

20 Most well-studied bacteria have been domesticated to some extent. How fast can a wild  
21 strain diverge from its ancestral phenotypes under domestication to a novel laboratory  
22 environment is poorly known. Yet such information is key to understand rates of  
23 evolution, the time scale at which a wild strain can be propagated without loss of its  
24 natural adaptive traits and the reliability of experimental results across labs. Using  
25 experimental evolution, phenotypic assays and whole-genome sequencing, we show  
26 that within a week of propagation in a common laboratory environment, a wild strain of  
27 *Bacillus subtilis* acquires mutations that cause changes in a multitude of traits. A single  
28 adaptive mutational step, in the gene coding for the transcriptional regulator DegU,  
29 impairs a DegU-dependent positive autoregulatory loop and leads to loss of robust  
30 biofilm architecture, impaired swarming motility, reduced secretion of exoproteases and  
31 changes in the dynamics of sporulation across environments. Importantly,  
32 domestication also resulted in improved fitness when the bacteria face pressure from  
33 cells of the innate immune system. These results show that *degU* is a key target for  
34 mutations during domestication and also underscore the importance of performing  
35 careful and extremely short-term propagations of wild isolates to conserve the traits  
36 encoded in their original genomes.

## 37 **Author Summary**

38 Domestication is the process by which organisms are selected to live in specific  
39 conditions and an important phenomenon that shapes the evolution and variation in  
40 many animals and plants. In microbes, domestication is also a key driver of adaptation.  
41 It can be beneficial, when improving microbes abilities that are important for  
42 biotechnology, but also problematic, especially when studying microbe-host interactions  
43 and the microbe natural behavior. Using a wild isolate of *Bacillus subtilis*, we determined  
44 the speed and genetic basis of microbial domestication using experimental evolution.  
45 Within 1 week of growth in the common laboratory media, mutations in the pleiotropic  
46 transcriptional regulator, DegU, emerge and spread in the populations. These lead to  
47 loss of social traits, increased resistance to bacteriophages and macrophages. The data  
48 highlights the extreme caution that is needed when culturing natural microbial isolates  
49 and may help explain why some key microbial social traits and behaviors may differ  
50 between different laboratories, even when these study the same strains.

## 51 Introduction

52 Most bacteria grown in the laboratory face environmental conditions that are very  
53 distinct from those in their natural habitat. In nature, hardly anywhere a bacterium would  
54 find a niche with plentiful nutrients and optimal aeration. Therefore, when sampled from  
55 the diverse natural world and subsequently cultured in the lab, bacteria can adapt  
56 genetically to a truly novel environment. Such evolutionary domestication can result in  
57 increased fitness in the lab at the cost of loss of previous adaptations [1]. Some studies  
58 in *Escherichia coli*, *Bacillus subtilis*, *Caulobacter crescentus*, and *Saccharomyces*  
59 *cerevisiae* have shown that adaptation to laboratory environments occurs via diverse  
60 genotypic paths, but some evolutionary parallelism has also been observed [2–5]. The  
61 tempo and mode of evolution under domestication is still poorly known. Yet, it is  
62 important to quantify how many of the current model bacteria have taken undetermined  
63 domestication paths.

64 The model organism for spore-forming bacteria, *B. subtilis* strain 168, is known  
65 to have acquired mutations during its laboratory life, which lead to loss of traits likely to  
66 be important for its natural life cycle in the soil, root plants or the gastrointestinal tract of  
67 various organisms [6]. Robust biofilm formation is one of such traits. Using genetic  
68 engineering it was possible to restore biofilm phenotypes exhibited by the parental less  
69 domesticated strain NCIB 3610 [6]. The latter is commonly used as a model for biofilm  
70 development. A recent study, however, as shown that this strain carries two mutations,  
71 one in *rapP* and the other in *dtd* [7], which lead to impaired of biofilm formation [8,9],  
72 rendering it less than an ideal model for wild *B. subtilis* strains with high capacity to form  
73 biofilms.

74 The ability to produce endospores (spores for simplicity) is another important trait  
75 of the life cycle of *B. subtilis*. Spores are highly resistant to external stresses and largely

76 responsible for the widespread dissemination of *B. subtilis*. The production of spores is  
77 a response to extreme nutrient depletion and under laboratory conditions it is triggered  
78 at the onset of the stationary phase of growth [10]. A recently characterized wild isolate  
79 of *B. subtilis*, BSP1, starts the process of spore formation during growth, unlike its  
80 domesticated relatives, and reaches a higher spore titer [11]. This occurs as a result of  
81 the main activator of the sporulation process, Spo0A~P, reaching higher levels per cell  
82 and in a larger fraction of the population during exponential growth. Spo0A is activated  
83 by phosphorylation by means of a phosphorelay that integrates multiple environmental,  
84 cell cycle and nutritional cues [10,11]. The precocious and increased sporulation of  
85 BSP1 is due to the lack of two genes coding for Rap phosphatases, able to drain  
86 phosphoryl groups from the phosphorelay, through the dephosphorylation of Spo0F, a  
87 phosphorelay component [11].

88         The large number of traits that can potentially be lost during continuous growth  
89 of *B. subtilis* in classical laboratory environments and the lack of knowledge regarding  
90 its first steps of adaptation makes it imperative to understand when and how the  
91 domestication process occurs. Experimental evolution offers a powerful methodology to  
92 study the dynamics of the repeatability of evolutionary change under the same  
93 laboratory conditions and to study domestication [12]. When coupled with genome  
94 sequencing, it allows a real-time assessment of the speed and genetic basis of  
95 adaptation to novel environments, as well as the order at which adaptive mutations fix  
96 in evolving populations [13–16].

97         Here we have used experimental evolution to follow the evolutionary path taken  
98 by a wild *B. subtilis* during domestication to a common laboratory environment. We  
99 found that within one week (8 passages), mutations in DegU, coding for a global  
100 transcriptional regulator [17–19], spread and cause a rapid change in several social

101 traits of *B. subtilis*, likely to be important for its fitness in the wild [20]. Using gene-editing  
102 we show that one of the *degU* mutations causes attenuation of swarming motility,  
103 reduction of biofilm production and alteration of its architecture, increased resistance to  
104 bacteriophage SPP1 infection and reduced exoprotease secretion. Importantly, the  
105 initial process of domestication also resulted in a change of the sporulation dynamics  
106 across environments and a fitness improvement when the bacteria face pressure from  
107 the innate immune system. DegU thus emerges as a central mutational target during  
108 domestication. Overall, our results indicate that the propagation of wild isolates in the  
109 laboratory should be performed with extreme care as domestication can lead to rampant  
110 loss of traits that while important for the *B. subtilis* natural life cycle are largely  
111 dispensable under laboratory conditions.

## 112 **Results**

### 113 **Emergence of a new adaptive colony morphology during *B. subtilis*** 114 **domestication.**

115         Five populations derived from a wild *B. subtilis* isolate (BSP1) hereinafter named  
116 Ancestral, were daily passaged for sixteen days, through dilution in a rich medium with  
117 agitation and aeration. Samples were frozen every two days so that evolutionary steps  
118 during short-term domestication could be followed through whole-genome sequencing.  
119 Daily plating revealed that, within the first week of the experiment, two new colony  
120 morphotypes emerged (Fig 1A). The ancestral type *a* dominated the initial populations,  
121 but a new type *b*, characterized by a flat colony morphotype, and a type *c*, an  
122 intermediate morphotype, reached appreciable frequencies rapidly. Type *b* was  
123 detected in all the populations, while type *c* was only observed in three out of five  
124 populations (Fig 1B). As type *b* achieved the highest frequency, reaching fixation after  
125 sixteen days in population 1 (Fig 1C), we conducted a detailed phenotypic and genetic  
126 characterization of its clones. The rapid spread of type *b*, as well as its repeated  
127 emergence, suggests that it carries a fitness advantage. To test this hypothesis, we  
128 selected a type *b* colony from population 1 at day eight, hereinafter named Evolved, and  
129 characterized its growth (S1A Fig). Indeed both the maximum growth rate and the  
130 carrying capacity of the Evolved were significantly higher than those of the Ancestral  
131 (S1B Fig). This shows that Evolved has increased fitness in the laboratory environment,  
132 and thus can outcompete Ancestral.

### 133 **DegU as a main target for the adaptation to the laboratory environment.**

134         To determine the genetic basis of the adaptive morphotype we performed whole-  
135 genome sequencing of the Ancestral and the Evolved clone. Only one mutation was  
136 observed, in the *degU* gene, coding for the response regulator DegU [21]. The non-

137 synonymous mutation is a T-to-G transition causing the substitution of isoleucine 186,  
138 in the helix-turn-helix motif (HTH), within the DNA-binding domain of DegU, by a  
139 methionine (I186M) [21] (Fig 2A). *degU* is part of the *degS-degU* operon, coding for a  
140 two-component system that controls social behaviors in *B. subtilis* [17,18,22,23]. This  
141 suggested that the I186M substitution caused an adaptive change capable of affecting  
142 several traits. The unphosphorylated form of DegU activates genes involved in the ability  
143 to uptake external DNA during competence development [24]. During growth, the  
144 intracellular concentration of the phosphorylated form of DegU (DegU~P), increases,  
145 leading to the progressive activation of genes required for swarming motility, biofilm  
146 formation and the secretion of extracellular enzymes [22,25]. Given the central  
147 importance of DegU in processes that could be costly in the laboratory environment we  
148 tested whether additional clones, that had evolved independently, also carried mutations  
149 in *degU*. Sanger sequencing revealed that all the five populations had mutations in  
150 *degU*: in addition to the mutation causing the I186M substitution (Evolved, in population  
151 1; see above), the same mutation was identified in a clone from population 4; a mutation  
152 causing the substitution of histidine 200 by a tyrosine (H200Y) was identified in two  
153 populations (in population 1 and in population 5), and another, causing the replacement  
154 of valine 131 by an aspartate (V131D) was identified in one (population 2) (Figs 2A and  
155 2B). Finally, one mutation caused the insertion of a TGA codon leading to premature  
156 translation arrest after codon D18 (Figs 2A and 2C; population 3). These populations  
157 exhibited distinct colony morphologies but all appeared less structured than the colonies  
158 formed by Ancestral (Fig 2C). The V131D substitution lies within the linker region that  
159 separates the receiver and DNA-binding domains of DegU, while H200Y (as for I186M;  
160 above) is located in the HTH motif (Fig 2B). All of the missense mutations affect amino  
161 acid residues that are conserved among DegU orthologs (S2A and S2B Figs) and are



162 thus likely to be functionally important. In particular, the I186M and H200Y substitutions  
163 are likely to affect DNA binding (Fig 2A; see also S1 Text for a discussion of the effect  
164 of the various substitutions). These results suggest a high degree of evolutionary  
165 parallelism at the gene level and implicate DegU as a main target for the domestication  
166 to the laboratory.

167 **The I186M substitution in DegU is responsible for the colony phenotype of**  
168 **Evolved.**

169 We proceeded with a detailed characterization of the Evolved from population 1  
170 which carried a I186M substitution in DegU. To test whether this mutation caused the  
171 alteration in colony morphology, the wildtype *degU* allele (or *degU<sup>Anc</sup>*, for Ancestral) and  
172 the allele coding for DegU<sup>I186M</sup> (found in population 1, or *degU<sup>Evo</sup>*) were introduced  
173 ectopically at the non-essential *amyE* gene in a strain bearing a *degU* knockout  
174 constructed in the background of Ancestral (S3 Fig; see also S1 Text). The resulting  
175 strains, termed *degU<sup>Anc</sup>* and *degU<sup>Evo</sup>*, had a colony morphology indistinguishable from  
176 Ancestral and Evolved / *degU<sup>Evo</sup>* respectively (Fig 3C). We infer that the *degU<sup>Evo</sup>* allele  
177 is responsible for the colony phenotype of Evolved.

178 ***degU<sup>I186M</sup>* causes adaptive loss of major social traits.**

179 Several social traits are regulated by the unphosphorylated form as well as by  
180 low, medium or high levels of DegU~P [18,19]. DegU functions as a “rheostat”, sensing  
181 environmental signals and allowing the expression of competence, social motility (or  
182 swarming), biofilm development and exoprotease production along a gradient in the  
183 cellular accumulation of Deg~P [18]. Competence development is positively regulated  
184 by the unphosphorylated form of DegU [24,26,27]. ComK is a regulatory protein required  
185 for competence development that drives transcription of the genes coding for the DNA  
186 uptake and integration machinery but also stimulates transcription of its own gene [28].

187 Unphosphorylated DegU functions as a priming protein in competence development by  
188 binding to the *comK* promoter and facilitating ComK stimulation of *comK* transcription at  
189 low ComK concentrations [24,28,29]. We found no differences in the development of  
190 competence between Ancestral or *degU<sup>Anc</sup>* and Evolved or *degU<sup>Evo</sup>* (S4 Fig). This  
191 suggests that the I186M substitution does not affect the function of the  
192 unphosphorylated form of DegU in promoting competence development and thus that  
193 *degU<sup>Anc</sup>* is not a loss-of-function allele. Low levels of DegU~P, however, activate  
194 transcription of genes involved in social motility, or swarming [17,22,30,31]. Swarming  
195 motility assays revealed that while the Ancestral and *degU<sup>Anc</sup>* have the ability to swarm,  
196 the Evolved and *degU<sup>Evo</sup>* show poor swarming ability (Fig 3A). A widely used laboratory  
197 strain, PY79, hereinafter termed Lab, as well as other laboratory strains, carry mutations  
198 that prevent swarming motility [32–34]. In our assay, Lab as well as a *degU* insertional  
199 mutant, are deficient in swarming motility (Fig 3A). Thus, the I186M substitution leads  
200 to limited pleiotropic effects, *i.e.*, decreased swarming motility without affecting  
201 competence.

202       The production of proteins responsible for biofilm formation is another trait under  
203 the control of DegU~P [17,22,35–37]. To query whether biofilm architecture and  
204 robustness were affected by the I186M substitution, we examined both the colony  
205 architecture over time, the colony being a biofilm formed at the solid medium/air  
206 interface, as well as the formation of biofilms at the liquid/air interface in liquid cultures.  
207 Both Ancestral and *degU<sup>Anc</sup>* showed a complex colony architecture characterized by  
208 many wrinkles after 24 h of incubation, and the complexity of the colony architecture  
209 increased with time during the assay (Fig 3B). In contrast, Evolved and *degU<sup>Evo</sup>* formed  
210 colonies that tended to be flatter and with fewer wrinkles (Figs 3B and 3C). As a control,  
211 colonies formed by a *degU* insertional mutant show extremely low complexity and

212 compared to Ancestral, Lab also formed colonies with a simpler architecture (Fig 3C).  
213 These results are consistent with the importance of DegU for the formation of a biofilm  
214 at a solid medium/air interface [36,37]. Similarly, in liquid cultures, both Evolved and  
215 *degU<sup>Evo</sup>* formed a biofilm at the liquid/air interface less robust than that of the Ancestral  
216 as determined by the quantification of the pellicle formed (Fig 4A and S5 Fig). Thus,  
217 *degU<sup>Evo</sup>* strongly affects the ability of *B. subtilis* to form complex, robust biofilms.

218 Other processes important for *B. subtilis* social natural lifestyle that depend on  
219 high levels of DegU~P include the secretion of exoproteases and survival under  
220 bacteriophage predation [18,30,38,39]. We found decreased exoprotease secretion in  
221 Evolved and the *degU<sup>Evo</sup>* strain, as compared to Ancestral and *degU<sup>Anc</sup>* (Fig 4B). For  
222 reference, exoprotease secretion was severely impaired in both the *degU* insertional  
223 mutant and in Lab (Fig 4B). Lastly, when infected with the bacteriophage SPP1, both  
224 Evolved and *degU<sup>Evo</sup>* showed increased resistance to phage infection, as compared to  
225 Ancestral and *degU<sup>Anc</sup>* or Lab (Fig 4C). Overall, these results reinforce the view that the  
226 *degU<sup>Evo</sup>* mutation is pleiotropic but not fully, as it affects the phenotypes regulated by  
227 DegU~P, including social mobility, biofilm formation, exoprotease production and  
228 resistance to phage infection, but does not impair the function of unphosphorylated  
229 DegU in priming competence.

### 230 **Decreased transcription of DegU~P-target genes after domestication.**

231 The phenotypic assays performed showed that the I186M substitution in DegU  
232 changed traits regulated by DegU~P in the first steps of domestication. The location of  
233 the I186M substitution in the HTH motif of DegU raised the possibility that the  
234 transcription of genes regulated by DegU~P could be impaired in Evolved in comparison  
235 with Ancestral. To test this, we constructed transcriptional fusions between the  
236 promoters for the *hag*, *bslA*, and *aprE* genes and the *gfp* gene. *hag* codes for flagellin,

237 the main component of the flagellum and is required for social motility; and the  
238 expression of *hag* indirectly requires low levels of DegU~P [17,40]. *bslA* codes for a self-  
239 assembling hydrophobin that forms a hydrophobic coat at the surface of biofilms; as  
240 shown in strain NC3610, a model for biofilm development, BslA is required for the  
241 formation of structurally complex colonies and biofilms [41–44]. Lastly, *aprE* codes for  
242 subtilisin, a major alkaline exoprotease [21,45]. Transcription of both the *bslA* and *aprE*  
243 genes is subject to a logic AND gate, in that it requires both derepression of both  
244 promoters under the control of Spo0A~P and in addition, DegU~P [17,21,41,46].

245 We then examined the transcription of these genes at the population (biofilms)  
246 and single-cell levels. In Ancestral, the  $P_{aprE^-}$ ,  $P_{bslA^-}$  and  $P_{degU-gfp}$  fusions were  
247 expressed throughout the architecturally complex colonies, whereas expression of  $P_{hag^-}$   
248 *gfp* was expressed mostly at the colony edge (Fig 4D). Expression of  $P_{aprE^-}$ ,  $P_{degU^-}$  and  
249  $P_{hag-gfp}$  was also detected in Lab, but at lower levels, and expression of  $P_{bslA-gfp}$  was  
250 not detected, consistent with the simpler colony morphology (Fig 4D). Interestingly, in  
251 spite of the maintenance of a complex colony architecture, expression of  $P_{bslA^-}$ ,  $P_{degU^-}$   
252 and  $P_{hag-gfp}$  was detected at very low levels in Evolved, and expression of  $P_{aprE-gfp}$  was  
253 not detected (Fig 4D). Thus, DegU<sup>I186M</sup> strongly curtails expression of DegU target  
254 genes during biofilm development.

255 During planktonic growth, transcription of *hag* decreases markedly in the absence  
256 of DegU~P [22]. Moreover, expression of *hag* is heterogeneous, with free cells showing  
257 higher expression levels than chained cells [47]. Accordingly, in Ancestral, the free cells  
258 showed higher fluorescence intensity from the  $P_{hag-gfp}$  fusion than chained cells (Figs  
259 5A and 5B). In contrast, Evolved showed a decrease in the GFP signal from  $P_{hag-gfp}$   
260 both in free cells (~2.2 fold) and chains (~2.8 fold), relative to the Ancestral (Fig 5B).  
261 Although Lab does not exhibit swarming motility, as previously reported [47] it showed

262 increased expression of  $P_{hag-gfp}$  in both free cells and chains when compared with  
263 Ancestral, which exhibits swarming motility (Fig 5B). Expression of *bslA* is  
264 heterogeneous in the Ancestral, as also found for *hag* (Fig 5A; see also above), and  
265 was ~2.8 fold lower in free cells when compared to chained cells (Fig 5B). Strikingly, no  
266 heterogeneous expression of *bslA* was observed in the Evolved clone (Fig 5B).  
267 Moreover, the level of *bslA* expression was similar in free cells and chains, although  
268 *bslA* expression was ~1.5 fold lower in the free cells when compared to Ancestral (Fig  
269 5B). In the Lab strain, which does not produce robust biofilms, transcription of *bslA* is  
270 markedly reduced (Fig 5B). DegU~P is a direct positive regulator of *aprE* and expression  
271 of *aprE* was shown to be bi-stable in a laboratory strain [46]. Consistent with this finding,  
272 low and high levels of *aprE* expression were detected for Lab, both in free cells and  
273 chains (Fig 5). In contrast, Ancestral did not express high levels of *aprE*, although it  
274 showed heterogeneity in *aprE* expression, both in free cells and chains (Fig 5). Lastly,  
275 Evolved showed greatly reduced expression of *aprE* (Fig 5). Thus, domestication is  
276 accompanied by a sharp decrease in the expression of *aprE*.

277 Overall, these results indicate that the I186M substitution in DegU strongly  
278 impairs the activity of the protein during biofilm development and planktonic growth.

### 279 **Domestication impairs a *degU* positive auto-regulatory loop**

280 In its high-level phosphorylated state, DegU~P activates transcription of *degU*  
281 itself [48,49] by binding to a site in the *degU* regulatory region [25,50]. Importantly, this  
282 positive auto-regulatory loop contributes to the heterogeneous expression of *degU* and  
283 the DegU~P-dependent genes [46]. Since Evolved shows reduced expression of  
284 DegU~P-target genes, we wanted to test whether DegU<sup>I186M</sup> also impaired expression  
285 of *degU*, reducing the levels of DegU. We found expression of  $P_{degU-gfp}$  to be  
286 heterogeneous in Ancestral, with chains showing a ~1.6 fold higher expression relative

287 to free cells in line with earlier results (Fig 5) [47]. In sharp contrast, no heterogeneous  
288 expression of *degU* was seen for the Evolved and Lab strains, in which expression  
289 levels, slightly reduced when compared to Ancestral, were similar between free cells  
290 and chains (Fig 5).

291 Together, these results suggest that I186M impairs the ability of DegU~P to  
292 activate transcription of *degU* itself. Impaired activation of the DegU auto-regulatory  
293 loop, in turn, reduces transcription of *degU* itself, explaining why the expression of genes  
294 directly or indirectly regulated by DegU~P in Evolved is strongly reduced.

## 295 **Domestication leads to increased fitness in the presence of cells of the immune** 296 **system.**

297 *B. subtilis* has been isolated from the gastrointestinal tract of several animals  
298 including humans [51,52] and has been found to grow, sporulate and persist in the  
299 murine gut [53,54]. Thus, it can experience selective pressures inside a host. To  
300 determine if domestication could impair the ability of *B. subtilis* to withstand a hostile  
301 host environment, we measured the fitness of Evolved and Ancestral in the presence of  
302 cells of the innate immune system - macrophages. The Evolved strain showed a fitness  
303 advantage over the Ancestral in the presence of macrophages (Fig 6A). This result  
304 shows that the domestication to the laboratory environment coincidentally leads to a  
305 fitness advantage for wild *B. subtilis* when facing cells of the host immune system.

## 306 **Sporulation efficiency changes across environments.**

307 High levels of DegU~P promote sporulation by increasing the levels of Spo0A~P,  
308 the master regulatory protein for entry into sporulation [23]. Since the I186M substitution  
309 reduced transcription of *degU*, we reasoned that changes in the frequency of sporulation  
310 could also have occurred during domestication. We first tested this phenotype in a host-  
311 related environment (RPMI medium) and found the sporulation efficiency of Ancestral

312 (and of *degU<sup>Anc</sup>*) to be ~1.5-fold higher than that of Evolved (or *degU<sup>Evo</sup>*) (Fig 6B). The  
313 levels of DegU, as assessed by immunoblot analysis with an anti-DegU antibody of  
314 established specificity [55], are slightly higher in RPMI for both Ancestral and *degU<sup>Anc</sup>*  
315 as compared to Evolved or *degU<sup>Evo</sup>* (Fig 6C).

316 We also tested the ability of our strains to sporulate in the environment where the  
317 domestication process occurred (LB medium). Most laboratory strains sporulate at very  
318 low levels in LB (about 10<sup>4</sup> spores/ml of culture as compared to 10<sup>8</sup> spores/ml in a  
319 medium such as DSM that support efficient sporulation) [11]. We found a small increase  
320 in the efficiency of sporulation for Evolved (and *degU<sup>Evo</sup>*) relative to Ancestral (or  
321 *degU<sup>Anc</sup>*) in LB (Fig 6D). In addition, all of the laboratory strains tested sporulated in LB  
322 at efficiencies lower than that of the Ancestral (or *degU<sup>Anc</sup>*), although one strain, JH642,  
323 sporulated better than the other laboratory strains tested under these conditions (Fig  
324 6D). This is consistent with the initial description of Ancestral, which enters sporulation  
325 during growth and reaches a higher titer of spores than any of the laboratory strains  
326 tested [11]. The steady-state levels of DegU in whole-cell lysates obtained 1 hour after  
327 the onset of stationary phase in LB revealed very similar levels of DegU for all the strains  
328 (Fig 6E).

329 These results show that the I186M mutation can affect the intracellular levels of  
330 DegU in a manner that depends on the environment and show that the influence of  
331 DegU on sporulation exhibits antagonistic pleiotropy.

## 333 Discussion

334 BSP1 is a gastro-intestinal isolate of *B. subtilis* in which sporulation initiates  
335 during growth. This happens because BSP1 lacks three *rap* genes, coding for  
336 phosphatases that normally drain phosphoryl groups from the phosphorelay, thus  
337 negatively regulating the activation of Spo0A. As such, more cells in the population have  
338 Spo0A active above a threshold level required to induce sporulation. Several other  
339 gastro-intestinal isolates of *B. subtilis*, including from the human gut, also lack  
340 combinations of the *rap* genes and show enhanced sporulation [11,54]. *B. subtilis*  
341 completes its entire life cycle in the gut [54], and it seems likely that sporulation is  
342 important for survival and/or propagation in the gut ecosystem, as shown for other  
343 spore-formers [56,57]. Sporulation is also important for the efficient dispersal of spore-  
344 formers through the environment and among hosts [58–60]. Sporulation is, however, a  
345 time and energetically costly process, requiring the differential expression of over 10%  
346 of the genome over a period of 7-8 hours [11,61]. Accordingly, the propagation of *B.*  
347 *subtilis* in the laboratory in the absence of selection for sporulation results in a reduction  
348 in the ability to sporulate [62,63]. *B. subtilis* has been used in laboratory conditions for  
349 more than fifty years, and has accumulated mutations likely to be adaptive in that  
350 environment and that, relative to wild strains, lead to the attenuation of phenotypic traits  
351 that include swarming motility [32,33], poly- $\gamma$ -glutamate synthesis [35], production of  
352 antibiotics, the secretion of degradative enzymes [64] or the formation of robust biofilms  
353 [35,65,66]. These processes have either become neutral with respect to fitness, or  
354 selection favored its loss under laboratory conditions.

355 Here we traced the first steps of domestication of strain BSP1. Rapid changes in  
356 colony morphotypes were observed in parallel cultures, leading to complete fixation of  
357 a specific colonial morphotype, termed type *b*, in all the replicate cultures after two



358 weeks (Fig 1). The adaptive morphotype is characterized by a smooth and flat colony,  
359 lacking the complex architectural features of the original strain (Fig 2C). Similar colony  
360 morphology changes were previously observed during domestication of other *B. subtilis*  
361 strains [3,62,63,67,68]. Colonies are biofilms formed at the solid/air interface [1]. As  
362 such, these observations hinted at attenuation of an important social behavior. Studies  
363 in *Salmonella enterica*, *Saccharomyces cerevisiae*, *Bacillus licheniformis*, and  
364 *Aneurinibacillus migulanus* have also documented the appearance of smooth colonies  
365 within a short period of time [5,69–71]. This suggests that phenotypic parallelism across  
366 species is a broad pattern of adaptation to the laboratory environment.

367         At the genomic level we detected mutations in the coding region of the *degU* gene  
368 (Fig 2). DegU is the response regulator of the two-component system DegS-DegU and  
369 controls social traits such as biofilm formation, swarming motility and exoprotease  
370 secretion [17]. In its non-phosphorylated state, DegU is responsible for the development  
371 of competence while the rise in DegU~P levels sequentially activates swarming, biofilm  
372 formation and exoprotease secretion [22]. DegU belongs to the NarL/FixJ subfamily of  
373 DNA binding proteins [72]. We characterized in detail the effects of a mutation leading  
374 to the I186M substitution in DegU, as this substitution showed a fast rate of fixation  
375 during domestication (Fig 1). The I186M substitution occurs in the DNA-recognition helix  
376 of the DegU HTH motif, located in the C-terminal domain of the protein (Fig 2A).  
377 Modeling studies indicate that this substitution is likely to affect a contact of the HTH  
378 motif with bases in the major groove of DNA as also shown in the crystal structure of  
379 NarL, in which I186 is conserved, with DNA [73] (Fig 2 and S2 Fig; see also S1 Text).  
380 Moreover, alanine-scanning mutagenesis showed decreased transcription of the DegU-  
381 controlled genes *comG* (as a proxy for the activity of ComK, a direct target of DegU) and  
382 *aprE* in a strain producing DegU<sup>I186A</sup>, and the substitution also affected the binding of

383 DegU to the *comK* and *aprE* target promoters [21]. I186 is also conserved in LuxR,  
384 another NarL family member, and its replacement by Ala also resulted in reduced  
385 binding to target DNA sequences [74]. One other substitution found in DegU in our study,  
386 H200Y, is also likely to impair DNA binding, as suggested by the study of a single Ala  
387 substitution in transcription and DNA binding to cognate sites in the promoters of the  
388 DegU-responsive genes *comK* and *aprE* [21]. This residue, however, as suggested by  
389 the structure of a NarL-DNA co-crystal, contacts the DNA phosphate backbone [73] (see  
390 also S1 Text). Importantly, while the I186M substitution found in the domesticated clone,  
391 Evolved, did not cause changes in the efficiency of transformation with exogenous DNA,  
392 it impaired processes regulated by DegU~P as swarming motility, biofilm formation,  
393 SPP1 bacteriophage sensitivity, and exoprotease secretion. In agreement with these  
394 observations, transcription of genes regulated by DegU~P was reduced in the  
395 domesticated clone and this phenotype, as well as the other phenotypes tested, was  
396 due to the I186M substitution, as shown by complementation analysis (S3 Fig). The  
397 transcription of *degU* itself was also reduced (Fig 5B); since our *degU* transcriptional  
398 reporter fusion includes all promoters known to contribute to the expression of the gene  
399 (S3 Fig), including the DegU~P-recognized P3 promoter, it follows that the I186M  
400 substitution affects the auto-regulatory loop that controls the production and activity of  
401 DegU [49]. Failure to activate the auto-regulatory loop most likely explains impaired  
402 biofilm development, exoprotease production and SPP1 sensitivity, which require high  
403 levels of DegU~P. It is important to note that the I186M substitution does not impair the  
404 accumulation of DegU, indicating that it did not grossly alter the folding of the protein at  
405 least under two conditions tested (Fig 6), as anticipated from the modeling studies.

406 The extensive propagation of *B. subtilis* in a nutrient-rich medium, *i.e.*, under  
407 conditions of relaxed selection for sporulation, resulted in the emergence of a strain that

408 accumulated mutations in genes of biosynthetic pathways, sporulation competence,  
409 DNA repair and others [62,63]. Relative to the ancestral, the resulting strain showed  
410 different cell and colony morphologies, loss of sporulation and competence, but an  
411 overall increased fitness under laboratory conditions [62,63]. Interestingly, our selection,  
412 which was also performed in a rich medium, LB, did not result in loss of sporulation.  
413 Rather, the I186M substitution modulated the efficiency of sporulation across conditions,  
414 specifically, in a host-related condition (RPMI medium) and in LB (Fig 6). Importantly,  
415 the accumulation of DegU was only slightly higher in Ancestral (and *degU<sup>Anc</sup>*) relative to  
416 Evolved when sporulation was tested in RPMI, where the sporulation efficiency of  
417 Ancestral (and *degU<sup>Anc</sup>*) was also higher than that of Evolved. Since high levels of  
418 DegU~P control production of Spo0A~P [23], it is possible that I186M places DegU~P  
419 below a threshold required for the stimulation of sporulation through Spo0A. This is  
420 consistent with decreased transcription of *degU* by DegU<sup>I186M</sup> (Fig 5B). In contrast,  
421 Evolved sporulated slightly better than Ancestral under nutritional conditions (LB  
422 medium) that do not support efficient sporulation by most laboratory strains (Fig 6).  
423 Again, the accumulation of DegU differed only slightly between Evolved and Ancestral.  
424 We note, however, that the accumulation of DegU reflects both transcription/production  
425 of the protein and proteolysis; since DegU~P is a preferred substrate for the ClpXP  
426 protease, the steady-state levels of the protein will reflect the ratio of DegU/DegU~P  
427 levels [49]. The inability of some domesticated strains of *B. subtilis* to form robust  
428 biofilms results from the accumulation of mutations in four chromosomal genes (*sfp*,  
429 *epsC*, *swrA*, and *degQ*), in addition to the loss of plasmid-born gene, *rapP* [6]. In  
430 contrast, under our experimental conditions, the target for mutation during domestication  
431 is *degU*. It seems possible that our experimental conditions did not cause relaxed  
432 selection for sporulation; rather, our selection may have targeted the most costly

433 phenotypes under the test conditions, those directly controlled by DegU~P, including  
434 the formation of complex colonies and robust biofilms, at least in the context of the BSP1  
435 genome. It is interestingly to note that a two-month culture of the Laboratory strain NCIB  
436 3610, resulted in the emergence of strains with different levels of biofilm robustness, as  
437 shown by the colony architecture and the expression of genes required for matrix  
438 production [3]. These phenotypes were the result of mutations in the *sinR* gene, coding  
439 for a master regulator of biofilm development, and arose both on plates as well as in LB  
440 cultures [3]. One conclusion offered was that matrix overproduction can be neutral or  
441 advantageous in a rich medium [3]. The difference in the mutations obtained under our  
442 experimental conditions and the study of Leiman and co-workers is in line with the idea  
443 that adaptations to a new environment, depend both on the initial genome as well as the  
444 culture history of the strain [75].

445       Taken together, the results suggest that the I186M mutation impairs the ability of  
446 DegU to function as a transcription factor and that this feature confers an advantage to  
447 BSP1 when growing under laboratory conditions. Interestingly, *arcA* in *E. coli* and *rpoS*  
448 in *S. enterica* and *E. coli*, regulators of stationary phase processes, are also common  
449 targets of laboratory adaptation [69,76]. This strengthens the evidence for a general rule  
450 that the initial adaptations to a new environment involve changes in genes that act as  
451 regulatory hubs of networks that affect the stationary phase of growth.

452       The accumulation of mutations during adaptation to a laboratory environment  
453 over a relatively small number of passages also unraveled a signal of antagonistic  
454 pleiotropy: Evolved exhibited changes in traits in host-related environments, and  
455 interestingly, it showed increased fitness in the presence of macrophages. This provides  
456 support for the coincidental hypothesis that adaptations to new environments can lead  
457 to changes in complex interactions with hosts, including virulence.

## 458 **Material and Methods**

459 **General methods.** Luria-Bertani (LB) medium was used for the routine growth of *B.*  
460 *subtilis* and *Escherichia coli*. The *E. coli* strain DH5 $\alpha$  was used as the host strain for the  
461 construction and maintenance of plasmids and was grown in the presence of 100  $\mu$ g  
462 ml<sup>-1</sup> ampicillin when carrying vectors or recombinant plasmids. When appropriate, *B.*  
463 *subtilis* strains were grown in the presence antibiotics, used at the following  
464 concentrations: 5  $\mu$ g ml<sup>-1</sup> chloramphenicol, 1  $\mu$ g ml<sup>-1</sup> erythromycin, 1  $\mu$ g ml<sup>-1</sup> neomycin  
465 for liquid cultures and 3  $\mu$ g ml<sup>-1</sup> neomycin on solid media.

466 **Other Methods.** The construction of all plasmids and strains is described in detail in the  
467 supplemental material. The *B. subtilis* strains used or constructed in this work are listed  
468 in S1 Table. Plasmids are listed in S2 Table and oligonucleotides in S3 Table. Modeling  
469 of the DegU structure is also described in the supplemental material.

470 **Domestication experiments.** Five independent populations, all derived from the  
471 ancestral wild isolate BSP1 [52], were grown for 16 days in LB with a 1:100 dilution into  
472 fresh medium every 24 h. This is a common media for growing *B. subtilis* in the  
473 laboratory environment and may introduce selective pressure against sporulation and  
474 biofilm formation. At the point of dilution, an aliquot from each culture was collected and  
475 kept frozen at -80°C for subsequent analysis.

476 **Whole-genome sequencing.** To identify the mutations that emerged after 8 days of  
477 evolution we extracted DNA from the Evolved clone from population 1 and from the  
478 Ancestral. The DNA library construction and sequencing were carried out by the IGC  
479 genomics facility. Each sample was pair-end sequenced on an Illumina MiSeq Benchtop  
480 Sequencer. Standard procedures produced data sets of Illumina paired-end 250-bp read  
481 pairs. The mean coverage per sample was of 30 and 18, for the Evolved and Ancestral

482 respectively. Mutations were identified using the BRESEQ pipeline version 0.32.1 [77]  
483 with default parameters and using the available BSP1 genome [78] as a reference  
484 genome. Genome sequencing data have been deposited in the NCBI Read Archive,  
485 <http://www.ncbi.nlm.nih.gov/sra> (accession no. XXXXX). All predicted mutations were  
486 manually inspected using IGV [79].

487 **Macrophages culture and infection assay.** The murine macrophage cell line RAW  
488 264.7 was cultured in RPMI medium (Sigma), supplemented with 2 mM L-glutamine, 1  
489 mM sodium pyruvate, 10 mM hepes, 50  $\mu$ M 2-mercaptoethanol solution and 10 % heat-  
490 inactivated Fetal Bovine Serum in an atmosphere of 5 % CO<sub>2</sub>. For the infection, *B.*  
491 *subtilis* and the macrophages were grown separately in a 24-well tissue plate containing  
492 fresh RPMI media as described above. At 24h of acclimatization, *B. subtilis* was diluted  
493 1:100 into fresh RPMI. Macrophages were washed, re-suspended in fresh RPMI and  
494 activated with 2  $\mu$ g ml<sup>-1</sup> CpG for another 24h [80]. Then, the macrophages were washed  
495 to remove the remaining CpG, fresh RPMI media was added and *B. subtilis* added to a  
496 1:8 MOI (multiplicity of infection; about 8 x 10<sup>6</sup> cells). At the indicated time points of  
497 infection, the wells were scrapped and the contents centrifuged at 6000 g for 10 minutes  
498 at room temperature. After centrifugation, the samples were serially diluted and plated  
499 to determine the titer of total, viable, cells and heat-resistant spores.

500 **Sporulation assays.** Sporulation of *B. subtilis* was usually analyzed in LB and in  
501 supplemented RPMI. When using LB, *B. subtilis* cultures were grown overnight, diluted  
502 1:100 and incubated for 24 h at 37 °C. At this time, dilutions of the cultures were plated  
503 for total viable counts and treated for 20 min at 80°C to determine the titer of heat-  
504 resistant spores. For supplemented RPMI, the cultures were grown as described above  
505 for 48h and plated for viable cells and spore counts as described above for LB. The

506 sporulation efficiency was defined as the ratio of heat-resistant spores relative to the  
507 total viable cell count [11].

508 **SPP1 phage lysates and transduction.** SPP1 lysates were prepared as described by  
509 Yasbin and Young [81]. Briefly, a dense culture of *B. subtilis* was infected with different  
510 dilutions of SPP1 in a semisolid LB agar (LB containing 0.7% agar). The plate containing  
511 near confluent phage plaques was washed with 4 ml of TBT, centrifuged at 5000 g for  
512 10 min, treated with 12  $\mu\text{g ml}^{-1}$  DNase and filtered through a 0.45  $\mu\text{m}$  syringe filter. The  
513 indicator strain PY79 was used for titration of the SPP1 lysates as described by São-  
514 José et al [82]. SPP1 phage transduction was performed as described [33]. The recipient  
515 strains were grown in LB until stationary phase after which 1 ml of the culture of the  
516 recipient strain was mixed in a glass tube with 10 mM  $\text{CaCl}_2$  and infected with an MOI  
517 of 1 of the donor SPP1 lysate. The transduction mixture was then incubated at 37 °C for  
518 25 min with agitation, centrifuged at 5000 g for 10 min, washed with 2 ml of LB, and  
519 centrifuged again at 5000 g for 10 min. The supernatant was discarded, the pellet was  
520 resuspended in 100  $\mu\text{l}$  of LB and plated onto LB plates fortified with 1.5 % agar with the  
521 appropriate antibiotics and 10 mM of sodium citrate.

522 **Competence assay.** Development of competence was performed as described by  
523 Baptista et al [39]. Briefly, *B. subtilis* cultures were grown overnight and diluted 1:100 in  
524 GM1 at 37 °C. Ninety minutes after the end of the exponential growth, the cultures were  
525 diluted 1:10 in GM2 and incubated for 90 minutes at 37 °C. At this point, a sample of the  
526 cultures was serially diluted in LB and plated for determination of total colony forming  
527 units (CFU) per milliliter. For transformation, DNA from strain AH7605 or W648 was  
528 added to 500  $\mu\text{l}$  of the culture samples, to a concentration of 5  $\mu\text{g ml}^{-1}$ , the mixture  
529 incubated for 30 min at 37 °C and finally plated with the appropriate antibiotics. The

530 transformation efficiency is the ratio between the number of transformants and the total  
531 number of colonies.

532 **Protease activity assay.** Secreted proteases were observed essentially as described  
533 by Saran et al [83]. The strains were grown until they reached an absorbance of 0.8 at  
534 600 nm. At this time the cultures were diluted to an absorbance of 0.01 at 600 nm. 10  
535  $\mu$ l of this dilution was spotted in a 2 % skimmed milk plate and incubated at 37 °C for 48  
536 h. Then, 6 ml of 10 % Tannic Acid was added for detection of the protease-positive  
537 strains. The diameter of the halos observed was measured, and the diameter of the  
538 colony was subtracted in order to obtain the real value of the halo.

539 **Swarming and colony morphology assays.** Swarming motility was examined  
540 according to the method described by Kearns and Losick [33]. For colony morphology,  
541 the *B. subtilis* cultures were grown overnight and 3  $\mu$ l of the culture was spotted onto an  
542 MSgg [84] plate fortified with 1.5 % agar. The plates were incubated at 28 °C or 37 °C.  
543 The images were captured at the times indicated in the figures.

544 **Biofilm quantification by crystal violet.** The method used for estimating the solid-  
545 surface-associated biofilm formation with crystal violet was as described by Morikawa  
546 et al [85]. Briefly, an overnight culture was diluted to an absorbance of 0.03 at 600 nm  
547 and mixed 1:100 into 100  $\mu$ l of MSgg in a 96-well plastic titer plate. The plate was  
548 incubated for 48 h at 25 °C. Then, the culture was carefully removed from the wells.  
549 After washing two times with distilled water, 150  $\mu$ l of 1 % crystal violet was added to  
550 the wells and incubated for 25 min at room temperature. The wells were washed again  
551 two times with distilled water and the crystal violet attached to the biofilm matrix was  
552 solubilized in 150  $\mu$ l of DMSO and incubated for 10 minutes at room temperature. The  
553 removed culture was quantified by measuring its absorbance at 600 nm and the biofilm  
554 attached to the crystal violet was quantified measuring its absorbance at 570 nm.



555 **Biofilm fluorescence imaging.** For biofilm imaging, the *B. subtilis* cultures were grown  
556 overnight and 3  $\mu$ l of the culture was spotted onto an MSgg plate fortified with 1.5 %  
557 agar and incubated for 96h at 28°C. Images were acquired on a Zeiss Axio Zoom.V16  
558 stereomicroscope equipped with a Zeiss Axiocam 503 mono CCD camera and  
559 controlled with the Zeiss Zen 2.1 (blue edition) software, using the 1x 0.25 NA objective,  
560 the fluorescence filter set GFP and the Bright Field optics.

561 **Fluorescence microscopy and image analysis.** Cultures were grown until one hour  
562 after the end of the exponential phase. The cells were collected by centrifugation (1 min  
563 at 2.400 x g, room temperature), and washed with 1 ml of phosphate-buffered saline  
564 (PBS). Finally, the cells were resuspended in 100  $\mu$ l of PBS and applied to microscopy  
565 slides coated with a film of 1.7% agarose. Images were taken with standard phase  
566 contrast and GFP filter, using a Leica DM 6000B microscope equipped with an  
567 aniXon+EM camera (Andor Technologies) and driven by Metamorph software (Meta  
568 Imaging series 7.7, Molecular Devices). For quantification of the GFP signal, 6x6 pixel  
569 regions were defined in the desired cell and the average pixel intensity was calculated  
570 and corrected by subtracting the average pixel intensity of the background, using  
571 Metamorph software (Meta Imaging series 7.7, Molecular Devices).

572 **Immunoblot analysis.** Cultures were grown until one hour after the end of the  
573 exponential phase and samples (10 ml) were withdrawn. The cells were collected by  
574 centrifugation (5 min at 15300 x g, 4° C). The cells were resuspended in 1ml Lysis buffer  
575 (50 mM NaH<sub>2</sub>PO<sub>4</sub>, 0.5 M NaCl, 10 mM Imidazole, pH 8.0) and whole-cell lysates  
576 prepared using a French press cell (19,000 lb/in<sup>2</sup>). Proteins in the lysates (10  $\mu$ g) were  
577 then separated on 15% SDS-PAGE gels and the gels subject to immunoblot analysis  
578 using an anti-DegU antibody of established specificity at a 1:1000 dilution [86]. Gels run  
579 in parallel were stained with Coomassie brilliant blue to be used as loading controls.

## 580 **Acknowledgments**

581           We thank Dr. Mitsuo Ogura for the gift of the anti-DegU antibody, Dr. Kazuo  
582 Kobayahis for the gift of strains WTF28 and W648, Dr. Jan-Willem Veening for the gift  
583 of strains 08G52, 08G57, and 08I09, and Dr. Carlos São José for the gift of the SPP1  
584 lysate and advice on its use. We also thank Mónica Serrano for helpful discussions.

## 585 **References**

- 586 1. Vlamakis H, Chai Y, Beauregard P, Losick R, Kolter R. Sticking together: building  
587 a biofilm the *Bacillus subtilis* way. *Nat Rev Microbiol.* 2013;11: 157–168.  
588 doi:10.1038/nrmicro2960
- 589 2. Eydallin G, Ryall B, Maharjan R, Ferenci T. The nature of laboratory domestication  
590 changes in freshly isolated *Escherichia coli* strains. *Environ Microbiol.* 2014;16:  
591 813–828. doi:10.1111/1462-2920.12208
- 592 3. Leiman SA, Arboleda LC, Spina JS, McLoon AL. SinR is a mutational target for  
593 fine-tuning biofilm formation in laboratory-evolved strains of *Bacillus subtilis*. *BMC*  
594 *Microbiol.* 2014;14: 301. doi:10.1186/s12866-014-0301-8
- 595 4. Marks ME, Castro-Rojas CM, Telling C, Du L, Kapatral V, Walunas TL, et al. The  
596 genetic basis of laboratory adaptation in *Caulobacter crescentus*. *J Bacteriol.*  
597 2010;192: 3678–3688. doi:10.1128/JB.00255-10
- 598 5. Kuthan M, Devaux F, Janderová B, Slaninová I, Jacq C, Palková Z. Domestication  
599 of wild *Saccharomyces cerevisiae* is accompanied by changes in gene expression  
600 and colony morphology. *Mol Microbiol.* 2003;47: 745–754. doi:10.1046/j.1365-  
601 2958.2003.03332.x
- 602 6. McLoon AL, Kolodkin-Gal I, Rubinstein SM, Kolter R, Losick R. Spatial regulation  
603 of histidine kinases governing biofilm formation in *Bacillus subtilis*. *J Bacteriol.*  
604 2011;193: 679–685. doi:10.1128/JB.01186-10
- 605 7. Pollak S, Omer Bendori S, Eldar A. A complex path for domestication of *B. subtilis*  
606 sociality. *Curr Genet.* 2015;61: 493–496. doi:10.1007/s00294-015-0479-9

- 607 8. Omer Bendori S, Pollak S, Hizi D, Eldar A. The RapP-PhrP quorum-sensing system  
608 of *Bacillus subtilis* strain NCIB3610 affects biofilm formation through multiple  
609 targets, due to an atypical signal-insensitive allele of RapP. *J Bacteriol.* 2015;197:  
610 592–602. doi:10.1128/JB.02382-14
- 611 9. Leiman SA, May JM, Lebar MD, Kahne D, Kolter R, Losick R. D-amino acids  
612 indirectly inhibit biofilm formation in *Bacillus subtilis* by interfering with protein  
613 synthesis. *J Bacteriol.* 2013;195: 5391–5395. doi:10.1128/JB.00975-13
- 614 10. Narula J, Kuchina A, Zhang F, Fujita M, Süel GM, Igoshin OA. Slowdown of growth  
615 controls cellular differentiation. *Mol Syst Biol.* 2016;12: 871.  
616 doi:10.15252/msb.20156691
- 617 11. Serra CR, Earl AM, Barbosa TM, Kolter R, Henriques AO. Sporulation during  
618 growth in a gut isolate of *Bacillus subtilis*. *J Bacteriol.* 2014;196: 4184–4196.  
619 doi:10.1128/JB.01993-14
- 620 12. Jerison ER, Desai MM. Genomic investigations of evolutionary dynamics and  
621 epistasis in microbial evolution experiments. *Curr Opin Genet Dev.* 2015;35: 33–  
622 39. doi:10.1016/j.gde.2015.08.008
- 623 13. Weinreich DM, Delaney NF, Depristo MA, Hartl DL. Darwinian evolution can follow  
624 only very few mutational paths to fitter proteins. *Science.* 2006;312: 111–114.  
625 doi:10.1126/science.1123539
- 626 14. Barrick JE, Lenski RE. Genome-wide mutational diversity in an evolving population  
627 of *Escherichia coli*. *Cold Spring Harb Symp Quant Biol.* 2009;74: 119–129.  
628 doi:10.1101/sqb.2009.74.018

- 629 15. Tenailon O, Rodríguez-Verdugo A, Gaut RL, McDonald P, Bennett AF, Long AD,  
630 et al. The molecular diversity of adaptive convergence. *Science*. 2012;335: 457–  
631 461. doi:10.1126/science.1212986
- 632 16. Herron MD, Rashidi A, Shelton DE, Driscoll WW. Cellular differentiation and  
633 individuality in the “minor” multicellular taxa. *Biol Rev Camb Philos Soc*. 2013;88:  
634 844–861. doi:10.1111/brv.12031
- 635 17. Verhamme DT, Kiley TB, Stanley-Wall NR. DegU co-ordinates multicellular  
636 behaviour exhibited by *Bacillus subtilis*. *Mol Microbiol*. 2007;65: 554–568.  
637 doi:10.1111/j.1365-2958.2007.05810.x
- 638 18. Murray EJ, Kiley TB, Stanley-Wall NR. A pivotal role for the response regulator  
639 DegU in controlling multicellular behaviour. *Microbiology (Reading, Engl)*.  
640 2009;155: 1–8. doi:10.1099/mic.0.023903-0
- 641 19. Lopez D, Vlamakis H, Kolter R. Generation of multiple cell types in *Bacillus subtilis*.  
642 *FEMS Microbiol Rev*. 2009;33: 152–163. doi:10.1111/j.1574-6976.2008.00148.x
- 643 20. Tarnita CE. The ecology and evolution of social behavior in microbes. *J Exp Biol*.  
644 2017;220: 18–24. doi:10.1242/jeb.145631
- 645 21. Shimane K, Ogura M. Mutational analysis of the helix-turn-helix region of *Bacillus*  
646 *subtilis* response regulator DegU, and identification of cis-acting sequences for  
647 DegU in the *aprE* and *comK* promoters. *J Biochem*. 2004;136: 387–397.  
648 doi:10.1093/jb/mvh127

- 649 22. Kobayashi K. Gradual activation of the response regulator DegU controls serial  
650 expression of genes for flagellum formation and biofilm formation in *Bacillus*  
651 *subtilis*. *Mol Microbiol.* 2007;66: 395–409. doi:10.1111/j.1365-2958.2007.05923.x
- 652 23. Marlow VL, Porter M, Hopley L, Kiley TB, Swedlow JR, Davidson FA, et al.  
653 Phosphorylated DegU manipulates cell fate differentiation in the *Bacillus subtilis*  
654 biofilm. *J Bacteriol.* 2014;196: 16–27. doi:10.1128/JB.00930-13
- 655 24. Ogura M, Tanaka T. *Bacillus subtilis* DegU acts as a positive regulator for *comK*  
656 expression. *FEBS Lett.* 1996;397: 173–176. doi:10.1016/s0014-5793(96)01170-2
- 657 25. Msadek T, Kunst F, Henner D, Klier A, Rapoport G, Dedonder R. Signal  
658 transduction pathway controlling synthesis of a class of degradative enzymes in  
659 *Bacillus subtilis*: expression of the regulatory genes and analysis of mutations in  
660 *degS* and *degU*. *J Bacteriol.* 1990;172: 824–834. doi:10.1128/jb.172.2.824-  
661 834.1990
- 662 26. Hahn J, Kong L, Dubnau D. The regulation of competence transcription factor  
663 synthesis constitutes a critical control point in the regulation of competence in  
664 *Bacillus subtilis*. *J Bacteriol.* 1994;176: 5753–5761. doi:10.1128/jb.176.18.5753-  
665 5761.1994
- 666 27. Kunst F, Msadek T, Bignon J, Rapoport G. The DegS/DegU and ComP/ComA two-  
667 component systems are part of a network controlling degradative enzyme synthesis  
668 and competence in *Bacillus subtilis*. *Res Microbiol.* 1994;145: 393–402.
- 669 28. Hamoen LW, Van Werkhoven AF, Venema G, Dubnau D. The pleiotropic response  
670 regulator DegU functions as a priming protein in competence development in

- 671 Bacillus subtilis. Proc Natl Acad Sci USA. 2000;97: 9246–9251.  
672 doi:10.1073/pnas.160010597
- 673 29. Lovett CM, Dubnau D. Transformation and Recombination. In: Sonenshein AL,  
674 Hoch JA, Losick R, editors. Bacillus subtilis and Its Closest Relatives. American  
675 Society of Microbiology; 2002. pp. 453–471. doi:10.1128/9781555817992.ch32
- 676 30. Ogura M, Yamaguchi H, Yoshida Ki null, Fujita Y, Tanaka T. DNA microarray  
677 analysis of Bacillus subtilis DegU, ComA and PhoP regulons: an approach to  
678 comprehensive analysis of B.subtilis two-component regulatory systems. Nucleic  
679 Acids Res. 2001;29: 3804–3813. doi:10.1093/nar/29.18.3804
- 680 31. Amati G, Bisicchia P, Galizzi A. DegU-P represses expression of the motility fla-  
681 che operon in Bacillus subtilis. J Bacteriol. 2004;186: 6003–6014.  
682 doi:10.1128/JB.186.18.6003-6014.2004
- 683 32. Patrick JE, Kearns DB. Laboratory strains of Bacillus subtilis do not exhibit  
684 swarming motility. J Bacteriol. 2009;191: 7129–7133. doi:10.1128/JB.00905-09
- 685 33. Kearns DB, Losick R. Swarming motility in undomesticated Bacillus subtilis. Mol  
686 Microbiol. 2003;49: 581–590. doi:10.1046/j.1365-2958.2003.03584.x
- 687 34. Kearns DB, Chu F, Rudner R, Losick R. Genes governing swarming in Bacillus  
688 subtilis and evidence for a phase variation mechanism controlling surface motility.  
689 Mol Microbiol. 2004;52: 357–369. doi:10.1111/j.1365-2958.2004.03996.x
- 690 35. Stanley NR, Lazazzera BA. Defining the genetic differences between wild and  
691 domestic strains of Bacillus subtilis that affect poly-gamma-dl-glutamic acid

- 692 production and biofilm formation. *Mol Microbiol.* 2005;57: 1143–1158.  
693 doi:10.1111/j.1365-2958.2005.04746.x
- 694 36. Branda SS, González-Pastor JE, Ben-Yehuda S, Losick R, Kolter R. Fruiting body  
695 formation by *Bacillus subtilis*. *Proc Natl Acad Sci USA.* 2001;98: 11621–11626.  
696 doi:10.1073/pnas.191384198
- 697 37. Hamon MA, Lazazzera BA. The sporulation transcription factor Spo0A is required  
698 for biofilm development in *Bacillus subtilis*. *Mol Microbiol.* 2001;42: 1199–1209.  
699 doi:10.1046/j.1365-2958.2001.02709.x
- 700 38. Dahl MK, Msadek T, Kunst F, Rapoport G. The phosphorylation state of the DegU  
701 response regulator acts as a molecular switch allowing either degradative enzyme  
702 synthesis or expression of genetic competence in *Bacillus subtilis*. *J Biol Chem.*  
703 1992;267: 14509–14514.
- 704 39. Baptista C, Barreto HC, São-José C. High levels of DegU-P activate an Esat-6-like  
705 secretion system in *Bacillus subtilis*. *PLoS ONE.* 2013;8: e67840.  
706 doi:10.1371/journal.pone.0067840
- 707 40. Tsukahara K, Ogura M. Promoter selectivity of the *Bacillus subtilis* response  
708 regulator DegU, a positive regulator of the *fla/che* operon and *sacB*. *BMC Microbiol.*  
709 2008;8: 8. doi:10.1186/1471-2180-8-8
- 710 41. Verhamme DT, Murray EJ, Stanley-Wall NR. DegU and Spo0A jointly control  
711 transcription of two loci required for complex colony development by *Bacillus*  
712 *subtilis*. *J Bacteriol.* 2009;191: 100–108. doi:10.1128/JB.01236-08



- 713 42. Kovács AT, Kuipers OP. Rok regulates *yuaB* expression during architecturally  
714 complex colony development of *Bacillus subtilis* 168. *J Bacteriol.* 2011;193: 998–  
715 1002. doi:10.1128/JB.01170-10
- 716 43. Kobayashi K, Iwano M. BslA(YuaB) forms a hydrophobic layer on the surface of  
717 *Bacillus subtilis* biofilms. *Mol Microbiol.* 2012;85: 51–66. doi:10.1111/j.1365-  
718 2958.2012.08094.x
- 719 44. Hogley L, Ostrowski A, Rao FV, Bromley KM, Porter M, Prescott AR, et al. BslA is  
720 a self-assembling bacterial hydrophobin that coats the *Bacillus subtilis* biofilm. *Proc*  
721 *Natl Acad Sci USA.* 2013;110: 13600–13605. doi:10.1073/pnas.1306390110
- 722 45. Marvasi M, Visscher PT, Casillas Martinez L. Exopolymeric substances (EPS) from  
723 *Bacillus subtilis*: polymers and genes encoding their synthesis. *FEMS Microbiol*  
724 *Lett.* 2010;313: 1–9. doi:10.1111/j.1574-6968.2010.02085.x
- 725 46. Veening J-W, Igoshin OA, Eijlander RT, Nijland R, Hamoen LW, Kuipers OP.  
726 Transient heterogeneity in extracellular protease production by *Bacillus subtilis*. *Mol*  
727 *Syst Biol.* 2008;4: 184. doi:10.1038/msb.2008.18
- 728 47. Kearns DB, Losick R. Cell population heterogeneity during growth of *Bacillus*  
729 *subtilis*. *Genes Dev.* 2005;19: 3083–3094. doi:10.1101/gad.1373905
- 730 48. Yasumura A, Abe S, Tanaka T. Involvement of nitrogen regulation in *Bacillus*  
731 *subtilis degU* expression. *J Bacteriol.* 2008;190: 5162–5171.  
732 doi:10.1128/JB.00368-08

- 733 49. Ogura M, Tsukahara K. Autoregulation of the *Bacillus subtilis* response regulator  
734 gene *degU* is coupled with the proteolysis of DegU-P by ClpCP. *Mol Microbiol.*  
735 2010;75: 1244–1259. doi:10.1111/j.1365-2958.2010.07047.x
- 736 50. Dartois V, Débarbouillé M, Kunst F, Rapoport G. Characterization of a novel  
737 member of the DegS-DegU regulon affected by salt stress in *Bacillus subtilis*. *J*  
738 *Bacteriol.* 1998;180: 1855–1861.
- 739 51. Hong HA, Khaneja R, Tam NMK, Cazzato A, Tan S, Urdaci M, et al. *Bacillus subtilis*  
740 isolated from the human gastrointestinal tract. *Res Microbiol.* 2009;160: 134–143.  
741 doi:10.1016/j.resmic.2008.11.002
- 742 52. Barbosa TM, Serra CR, La Razione RM, Woodward MJ, Henriques AO. Screening  
743 for bacillus isolates in the broiler gastrointestinal tract. *Appl Environ Microbiol.*  
744 2005;71: 968–978. doi:10.1128/AEM.71.2.968-978.2005
- 745 53. Duc LH, Hong HA, Barbosa TM, Henriques AO, Cutting SM. Characterization of  
746 *Bacillus* probiotics available for human use. *Appl Environ Microbiol.* 2004;70: 2161–  
747 2171. doi:10.1128/aem.70.4.2161-2171.2004
- 748 54. Tam NKM, Uyen NQ, Hong HA, Duc LH, Hoa TT, Serra CR, et al. The intestinal life  
749 cycle of *Bacillus subtilis* and close relatives. *J Bacteriol.* 2006;188: 2692–2700.  
750 doi:10.1128/JB.188.7.2692-2700.2006
- 751 55. Ishii H, Tanaka T, Ogura M. The *Bacillus subtilis* response regulator gene *degU* is  
752 positively regulated by CcpA and by catabolite-repressed synthesis of ClpC. *J*  
753 *Bacteriol.* 2013;195: 193–201. doi:10.1128/JB.01881-12

- 754 56. Hutchison EA, Miller DA, Angert ER. Sporulation in Bacteria: Beyond the Standard  
755 Model. *Microbiol Spectr*. 2014;2. doi:10.1128/microbiolspec.TBS-0013-2012
- 756 57. Chase DG, Erlandsen SL. Evidence for a complex life cycle and endospore  
757 formation in the attached, filamentous, segmented bacterium from murine ileum. *J*  
758 *Bacteriol*. 1976;127: 572–583.
- 759 58. Browne HP, Forster SC, Anonye BO, Kumar N, Neville BA, Stares MD, et al.  
760 Culturing of ‘unculturable’ human microbiota reveals novel taxa and extensive  
761 sporulation. *Nature*. 2016;533: 543–546. doi:10.1038/nature17645
- 762 59. Forster SC, Kumar N, Anonye BO, Almeida A, Viciani E, Stares MD, et al. A human  
763 gut bacterial genome and culture collection for improved metagenomic analyses.  
764 *Nat Biotechnol*. 2019;37: 186–192. doi:10.1038/s41587-018-0009-7
- 765 60. Lawley TD, Clare S, Walker AW, Goulding D, Stabler RA, Croucher N, et al.  
766 Antibiotic treatment of clostridium difficile carrier mice triggers a supershedder  
767 state, spore-mediated transmission, and severe disease in immunocompromised  
768 hosts. *Infect Immun*. 2009;77: 3661–3669. doi:10.1128/IAI.00558-09
- 769 61. Henriques AO, Moran CP. Structure, assembly, and function of the spore surface  
770 layers. *Annu Rev Microbiol*. 2007;61: 555–588.  
771 doi:10.1146/annurev.micro.61.080706.093224
- 772 62. Maughan H, Nicholson WL. Increased fitness and alteration of metabolic pathways  
773 during *Bacillus subtilis* evolution in the laboratory. *Appl Environ Microbiol*. 2011;77:  
774 4105–4118. doi:10.1128/AEM.00374-11

- 775 63. Brown CT, Fishwick LK, Chokshi BM, Cuff MA, Jackson JM, Oglesby T, et al.  
776 Whole-genome sequencing and phenotypic analysis of *Bacillus subtilis* mutants  
777 following evolution under conditions of relaxed selection for sporulation. *Appl*  
778 *Environ Microbiol.* 2011;77: 6867–6877. doi:10.1128/AEM.05272-11
- 779 64. Marlow VL, Cianfanelli FR, Porter M, Cairns LS, Dale JK, Stanley-Wall NR. The  
780 prevalence and origin of exoprotease-producing cells in the *Bacillus subtilis* biofilm.  
781 *Microbiology (Reading, Engl).* 2014;160: 56–66. doi:10.1099/mic.0.072389-0
- 782 65. McLoon AL, Guttenplan SB, Kearns DB, Kolter R, Losick R. Tracing the  
783 domestication of a biofilm-forming bacterium. *J Bacteriol.* 2011;193: 2027–2034.  
784 doi:10.1128/JB.01542-10
- 785 66. Urushibata Y, Tokuyama S, Tahara Y. Difference in transcription levels of *cap*  
786 genes for gamma-polyglutamic acid production between *Bacillus subtilis* IFO 16449  
787 and Marburg 168. *J Biosci Bioeng.* 2002;93: 252–254.
- 788 67. Zeigler DR, Nicholson WL. Experimental evolution of *Bacillus subtilis*. *Environ*  
789 *Microbiol.* 2017;19: 3415–3422. doi:10.1111/1462-2920.13831
- 790 68. Kovács ÁT, Dragoš A. Evolved Biofilm: Review on the Experimental Evolution  
791 Studies of *Bacillus subtilis* Pellicles. *J Mol Biol.* 2019;  
792 doi:10.1016/j.jmb.2019.02.005
- 793 69. Davidson CJ, White AP, Surette MG. Evolutionary loss of the *rdar* morphotype in  
794 *Salmonella* as a result of high mutation rates during laboratory passage. *ISME J.*  
795 2008;2: 293–307. doi:10.1038/ismej.2008.4

- 796 70. Caetano T, Süssmuth RD, Mendo S. Impact of domestication in the production of  
797 the class II lanthipeptide lichenicidin by *Bacillus licheniformis* I89. *Curr Microbiol.*  
798 2015;70: 364–368. doi:10.1007/s00284-014-0727-0
- 799 71. Berditsch M, Afonin S, Ulrich AS. The ability of *Aneurinibacillus migulanus* (*Bacillus*  
800 *brevis*) to produce the antibiotic gramicidin S is correlated with phenotype variation.  
801 *Appl Environ Microbiol.* 2007;73: 6620–6628. doi:10.1128/AEM.00881-07
- 802 72. Baikalov I, Schröder I, Kaczor-Grzeskowiak M, Grzeskowiak K, Gunsalus RP,  
803 Dickerson RE. Structure of the *Escherichia coli* response regulator NarL.  
804 *Biochemistry.* 1996;35: 11053–11061. doi:10.1021/bi960919o
- 805 73. Maris AE, Kaczor-Grzeskowiak M, Ma Z, Kopka ML, Gunsalus RP, Dickerson RE.  
806 Primary and secondary modes of DNA recognition by the NarL two-component  
807 response regulator. *Biochemistry.* 2005;44: 14538–14552. doi:10.1021/bi050734u
- 808 74. Eglund KA, Greenberg EP. Quorum sensing in *Vibrio fischeri*: analysis of the LuxR  
809 DNA binding region by alanine-scanning mutagenesis. *J Bacteriol.* 2001;183: 382–  
810 386. doi:10.1128/JB.183.1.382-386.2001
- 811 75. Ryall B, Eydallin G, Ferenci T. Culture history and population heterogeneity as  
812 determinants of bacterial adaptation: the adaptomics of a single environmental  
813 transition. *Microbiol Mol Biol Rev.* 2012;76: 597–625. doi:10.1128/MMBR.05028-  
814 11
- 815 76. Saxer G, Krepps MD, Merkley ED, Ansong C, Deatherage Kaiser BL, Valovska M-  
816 T, et al. Mutations in global regulators lead to metabolic selection during adaptation  
817 to complex environments. *PLoS Genet.* 2014;10: e1004872.  
818 doi:10.1371/journal.pgen.1004872

- 819 77. Deatherage DE, Barrick JE. Identification of mutations in laboratory-evolved  
820 microbes from next-generation sequencing data using breseq. *Methods Mol Biol.*  
821 2014;1151: 165–188. doi:10.1007/978-1-4939-0554-6\_12
- 822 78. Schyns G, Serra CR, Lapointe T, Pereira-Leal JB, Potot S, Fickers P, et al. Genome  
823 of a Gut Strain of *Bacillus subtilis*. *Genome Announc.* 2013;1.  
824 doi:10.1128/genomeA.00184-12
- 825 79. Robinson JT, Thorvaldsdóttir H, Winckler W, Guttman M, Lander ES, Getz G, et al.  
826 Integrative genomics viewer. *Nat Biotechnol.* 2011;29: 24–26.  
827 doi:10.1038/nbt.1754
- 828 80. Miskinyte M, Sousa A, Ramiro RS, de Sousa JAM, Kotlinowski J, Caramalho I, et  
829 al. The genetic basis of *Escherichia coli* pathoadaptation to macrophages. *PLoS*  
830 *Pathog.* 2013;9: e1003802. doi:10.1371/journal.ppat.1003802
- 831 81. Yasbin RE, Young FE. Transduction in *Bacillus subtilis* by bacteriophage SPP1. *J*  
832 *Viol.* 1974;14: 1343–1348.
- 833 82. São-José C, Baptista C, Santos MA. *Bacillus subtilis* operon encoding a membrane  
834 receptor for bacteriophage SPP1. *J Bacteriol.* 2004;186: 8337–8346.  
835 doi:10.1128/JB.186.24.8337-8346.2004
- 836 83. Saran S, Isar J, Saxena RK. A modified method for the detection of microbial  
837 proteases on agar plates using tannic acid. *J Biochem Biophys Methods.* 2007;70:  
838 697–699. doi:10.1016/j.jbbm.2007.03.005

- 839 84. Branda SS, Chu F, Kearns DB, Losick R, Kolter R. A major protein component of  
840 the *Bacillus subtilis* biofilm matrix. *Mol Microbiol.* 2006;59: 1229–1238.  
841 doi:10.1111/j.1365-2958.2005.05020.x
- 842 85. Morikawa M, Kagihiro S, Haruki M, Takano K, Branda S, Kolter R, et al. Biofilm  
843 formation by a *Bacillus subtilis* strain that produces gamma-polyglutamate.  
844 *Microbiology (Reading, Engl).* 2006;152: 2801–2807. doi:10.1099/mic.0.29060-0
- 845 86. Hata M, Ogura M, Tanaka T. Involvement of stringent factor RelA in expression of  
846 the alkaline protease gene *aprE* in *Bacillus subtilis*. *J Bacteriol.* 2001;183: 4648–  
847 4651. doi:10.1128/JB.183.15.4648-4651.2001

## 848 Supporting information

849 **S1 Fig. Evolved has better fitness than Ancestral.** (A) Comparison of the growth  
850 curves of Ancestral (red line) and Evolved (blue line) in LB. (B) 95% family-wise  
851 confident intervals comparing Evolved with Ancestral for  $\mu$  (slope),  $\lambda$  (lag), A  
852 (max) and AUC (area under the curve), using ANOVA and Dunnett post-test. The  
853 analysis and the graphics were obtained from  
854 <https://mdphan.shinyapps.io/GrowthCurvesAnalysis/>.

855 **S2 Fig. Alignment of DegU orthologs.** (A) Sequence conservation profile of DegU  
856 homologs computed from a Hidden Markov Model multiple sequence alignment using  
857 Skylin [17]. The overall height indicates the conservation per position. The orange  
858 dashed line shows the position of D18, V131, I186, and H200. With the exception of  
859 V131, all other residues are in highly conserved regions; V131, however, is located in a  
860 conserved hydrophobic patch (expanded in panel B). (B) Alignment of the regions close  
861 to the observed substitutions in DegU. The panel was produced with ESPript 3.0 [18]  
862 following a Clustal Omega [19] alignment of the selected sequences. The red arrows  
863 indicate the residues which are the site of the V131D, I186M, and H200Y substitutions  
864 herein described. The boxes indicate blocks of high sequence identity; red indicates  
865 chemical similarity. The sequence of *E. faecium* LiaR, used for the homology modeling  
866 of the *B. subtilis* DegU protein, is indicated below the consensus. The positions of  
867 helices 8 (scaffolding helix) and 9 (DNA recognition helix) is also shown. The brown dots  
868 indicate residues important for binding of DegU to the *comK* and *aprE* promoters [13].

869 **S3 Fig. Construction of strains bearing *degU*<sup>Anc</sup> and *degU*<sup>Evo</sup> at an ectopic site.**  
870 The figure depicts the construction of strains HB13 and HB14. (A) left: genome  
871 organization of the native *degU* locus, at the left of *oriC*, as shown in the circle below



872 the genetic map, in Ancestral. Note the presence of the three promoters, P1 to P3, that  
873 drive expression of *degU*. Right: strains HB11 and HB12 are BSP1 derivatives bearing  
874 a *degU::em* insertion at the *degU* normal locus and an insertion of the *degU* region at  
875 the non-essential *amyE* locus, to the right of *oriC*, as depicted. The region inserted at  
876 *amyE* includes a *degS* in frame-deletion that removes nucleotides 75-912 of the coding  
877 region, so that the strain has only one copy of the gene, at the normal locus. The *degU*  
878 allele inserted at *amyE* codes for a form of the protein with the A10E substitution, in  
879 strain HB11 (blue), or for the I186M substitution, in strain HB12 (red), as shown. Note  
880 that in both strains, expression of *degU* from *amyE* can still occur from P1 to P3. (B)  
881 The panel depicts the result of transforming HB11 or HB12 with plasmid pHB1. Using  
882 HB11 as the recipient, a wild-type *degU* allele is restored, yielding HB13. Using HB12  
883 as the recipient, the mutation leading to the A10E substitution is corrected, yielding  
884 strain HB14, which expresses *degU<sup>Evo</sup>* (*degU<sup>I186M</sup>*) from *amyE* (see text for details).

885 **S4 Fig. Competence is not affected in Evolved.** Transformation of Ancestral and  
886 Evolved with genomic DNA from (A) AH7605 and (B) W648. The transformation  
887 efficiency is expressed as the ratio between the number of transformants obtained and  
888 the total number of colonies.

889 **S5 Fig. Pellicle formation is impaired in Evolved.** Representative images of pellicle  
890 formation by Ancestral and Evolved after incubation in liquid MSgg medium at 28°C for  
891 the indicated time, in hours. The region boxed in red in the two sets of panels on the left,  
892 for each time sample, are magnified on the right. Scale bar, 1 cm.

893 **S1 Text. Supporting information text.**

894 **S1 Table. Bacterial strains used in this study.**

895 **S2 Table. Plasmids used in this study.**

*degU* as a main mutational target during *B. subtilis* domestication

Barreto et al.

896 **S3 Table. Oligonucleotide primers used in this study.**

## 897 **Figure captions**

898 **Fig. 1. Changes in colony morphology with domestication.** (A) Representative  
899 image of the Ancestral colony morphology and of the three different types of colony  
900 morphology, *a*, *b* and *c*, observed at the eight and sixteen day of the domestication  
901 experiment in the five evolved populations; (B) Frequency of each morphotype in the  
902 five populations at day 8; (C) Frequency of morphotype *b* in population 1 along time.  
903 The scale bar represents 1 cm and applies to all panels.

904 **Fig. 2. Domestication is accompanied by mutations in *degU*.** (A) *degU* region of the  
905 *B. subtilis* chromosome (top) and domain organization of the DegU protein (bottom).  
906 The position of the various mutations found and the corresponding amino acid  
907 substitution is indicated. (B) Model of the full-length DegU protein of *B. subtilis* obtained  
908 by comparative modeling and using the crystal structure of the LiaR protein from  
909 *Enterococcus faecalis* as the template (PDB code: 5hev). The protein is thought to form  
910 a dimer and the two monomers are represented in blue and light brown, with the position  
911 of the receiver and DNA-binding domains indicated. The red arrows indicate the location  
912 of the single amino acid substitutions found in DegU. *a* and *b*, show a magnification of  
913 the regions encompassing the V131D (*a*) and I186M and H200Y (*b*) substitutions. In *b*,  
914 the region of the helix-turn-helix (HTH) motif is modeled with DNA, to highlight the likely  
915 involvement of residues I186 and H200 in DNA binding. The HTH motif was  
916 independently modeled using the crystal structure of the LiaR DNA-binding domain as  
917 the template (PDB code: 4wuh). (C) Representative images showing the complex biofilm  
918 morphology of Ancestral and clones representative of each population after 16 days of  
919 domestication. In red are indicated the mutation in DegU present in each clone. All  
920 strains were incubated in MSgg for 96h at 28°C. Scale bar, 1 cm.

921 **Fig. 3. *degU<sup>Evo</sup>* is responsible for the alteration in swarming motility and colony**  
922 **architecture.** (A) Swarming motility assay of Ancestral, Evolved, *degU<sup>Anc</sup>* (HB13),  
923 *degU<sup>Evo</sup>* (HB14),  $\Delta$ *degU* (HB4), and Lab (PY79). LB plates fortified with 0.7% of agar  
924 were inoculated incubated for 16h at 28°C. Swarm expansion, resulting from bacterial  
925 growth, appears in white, whereas uncolonized agar appears in black. (B)  
926 Representative images showing the complex colony architecture development along  
927 with the indicated time points of the Ancestral and Evolved. The strains were grown in  
928 MSgg medium at 28°C. (C) Representative images showing the complex colony  
929 architecture of the indicated strains on MSgg agar plates incubated for 96h at 28°C.  
930 Scale bars, 1 cm.

931 **Fig. 4. *degU<sup>Evo</sup>* is responsible for the alteration in biofilm complexity, exoprotease**  
932 **secretion, phage resistance and the pattern of gene expression during biofilm**  
933 **formation.** (A) Quantification by the crystal violet method of the biofilms formed by the  
934 indicated strains in MSgg broth incubated at 25°C for the indicated time points. For the  
935 statistics the Mann-Whitney test was used. For \*\*\*\*,  $p < 0.0001$ . (B) Dimension of the  
936 halos produced by the indicated strains in LB fortified with 1.5 % agar and supplemented  
937 with 2% of skimmed milk incubated at 37°C for 48h. For the statistics an unpaired t-test  
938 with Welch's correction was used. For \*\*\*\*,  $p < 0.0001$ , for \*\*\*,  $p = 0.0066$ . The error bar  
939 represents the standard deviation. Scale bar, 10 mm (C) Efficiency of Plating (EOP)  
940 shown in white numbers for the Ancestral, Evolved, *degU<sup>Anc</sup>* (HB13), *degU<sup>Evo</sup>* (HB14),  
941  $\Delta$ *degU* (HB4) using as a reference the indicator strain Lab (PY79), which is phage  
942 sensitive. The yellow arrows indicate SPP1 phage plaques. Note that Ancestral is  
943 sensitive to SPP1 but the plaque size is reduced when compared with the Lab strain,  
944 while the Evolved is resistant. Scale bars, 1 cm. (D) Representative images of the

945 expression of transcriptional fusions between the *aprE*, *bslA*, *hag* and *degU* promoter  
946 regions and *gfp* after 96h of incubation in MSgg at 28°C. Scale bar, 1 cm.

947 **Fig. 5. *degU*<sup>Evo</sup> alters the pattern of gene expression at the single-cell level.** (A)  
948 Representative images of the expression of *hag*-, *bslA*-, *aprE*- and *degU-gfp*  
949 transcriptional fusions one hour after the onset of stationary phase in LB. The cultures  
950 were grown with agitation at 37°C. Scale bar, 1 µm. (B) Relative frequency of expression  
951 of transcriptional fusions of the indicated promoters to *gfp* in the same conditions as  
952 above.

953 **Fig. 6. *degU*<sup>Evo</sup> increases survival in the presence of macrophages and changes**  
954 **sporulation efficiency in an environment-dependent manner.** (A) Macrophages  
955 were infected with Ancestral and Evolved and colony-forming units of both the  
956 intracellular and extracellular bacteria obtained by plating the at the indicated time  
957 points. The error bar represents the standard deviation of 9 replicates. (B) Comparison  
958 of the sporulation efficiency in RPMI medium between Ancestral, Evolved, *degU*<sup>Anc</sup>  
959 (HB13) and *degU*<sup>Evo</sup> (HB14). The efficiency of sporulation was calculated as the ratio  
960 between the heat resistant spore counts and total (viable) cells. The dashed line  
961 indicates the average sporulation efficiency for the Ancestral in LB. For the statistics an  
962 unpaired t-test with Welch's correction was used. For \*\*\*\*, p<0.0001. (C) Accumulation  
963 of DegU in Ancestral, Evolved, *degU*<sup>Anc</sup> (HB13), *degU*<sup>Evo</sup> (HB14) and the *degU*  
964 insertional mutant (HB4) in RPMI. (D) Comparison of the sporulation efficiency and  
965 variance in LB between Ancestral, Evolved, *degU*<sup>Anc</sup> (HB13), *degU*<sup>Evo</sup> (HB14), Lab and  
966 three other commonly used laboratory strains (MB24, JH642 and 168). For the statistics  
967 an unpaired t-test with Welch's correction was used. For \*, p=0.0113. (E) The levels of  
968 DegU are similar between Ancestral and Evolved in LB. Accumulation of DegU in  
969 Ancestral, Evolved, *degU*<sup>Anc</sup> (HB13), *degU*<sup>Evo</sup> (HB14), and the *degU* insertional mutant

970 (HB4). In (C) and (D), the cells were collected 1 hour after the onset of stationary phase  
971 in RPMI (C) or LB (D) and whole-cell lysates prepared. Proteins (20 µg) in whole-cell  
972 lysates were resolved by SDS-PAGE and subject to immunoblot analysis with an anti-  
973 DegU antibody. The arrow shows the position of DegU; the red arrows indicate slightly  
974 higher levels of DegU. The panel below the immunoblot shows part of a Coomassie-  
975 stained gel, run in parallel, as a loading control. The position of molecular weight  
976 markers (in kDa) is shown on the left side of the panels.

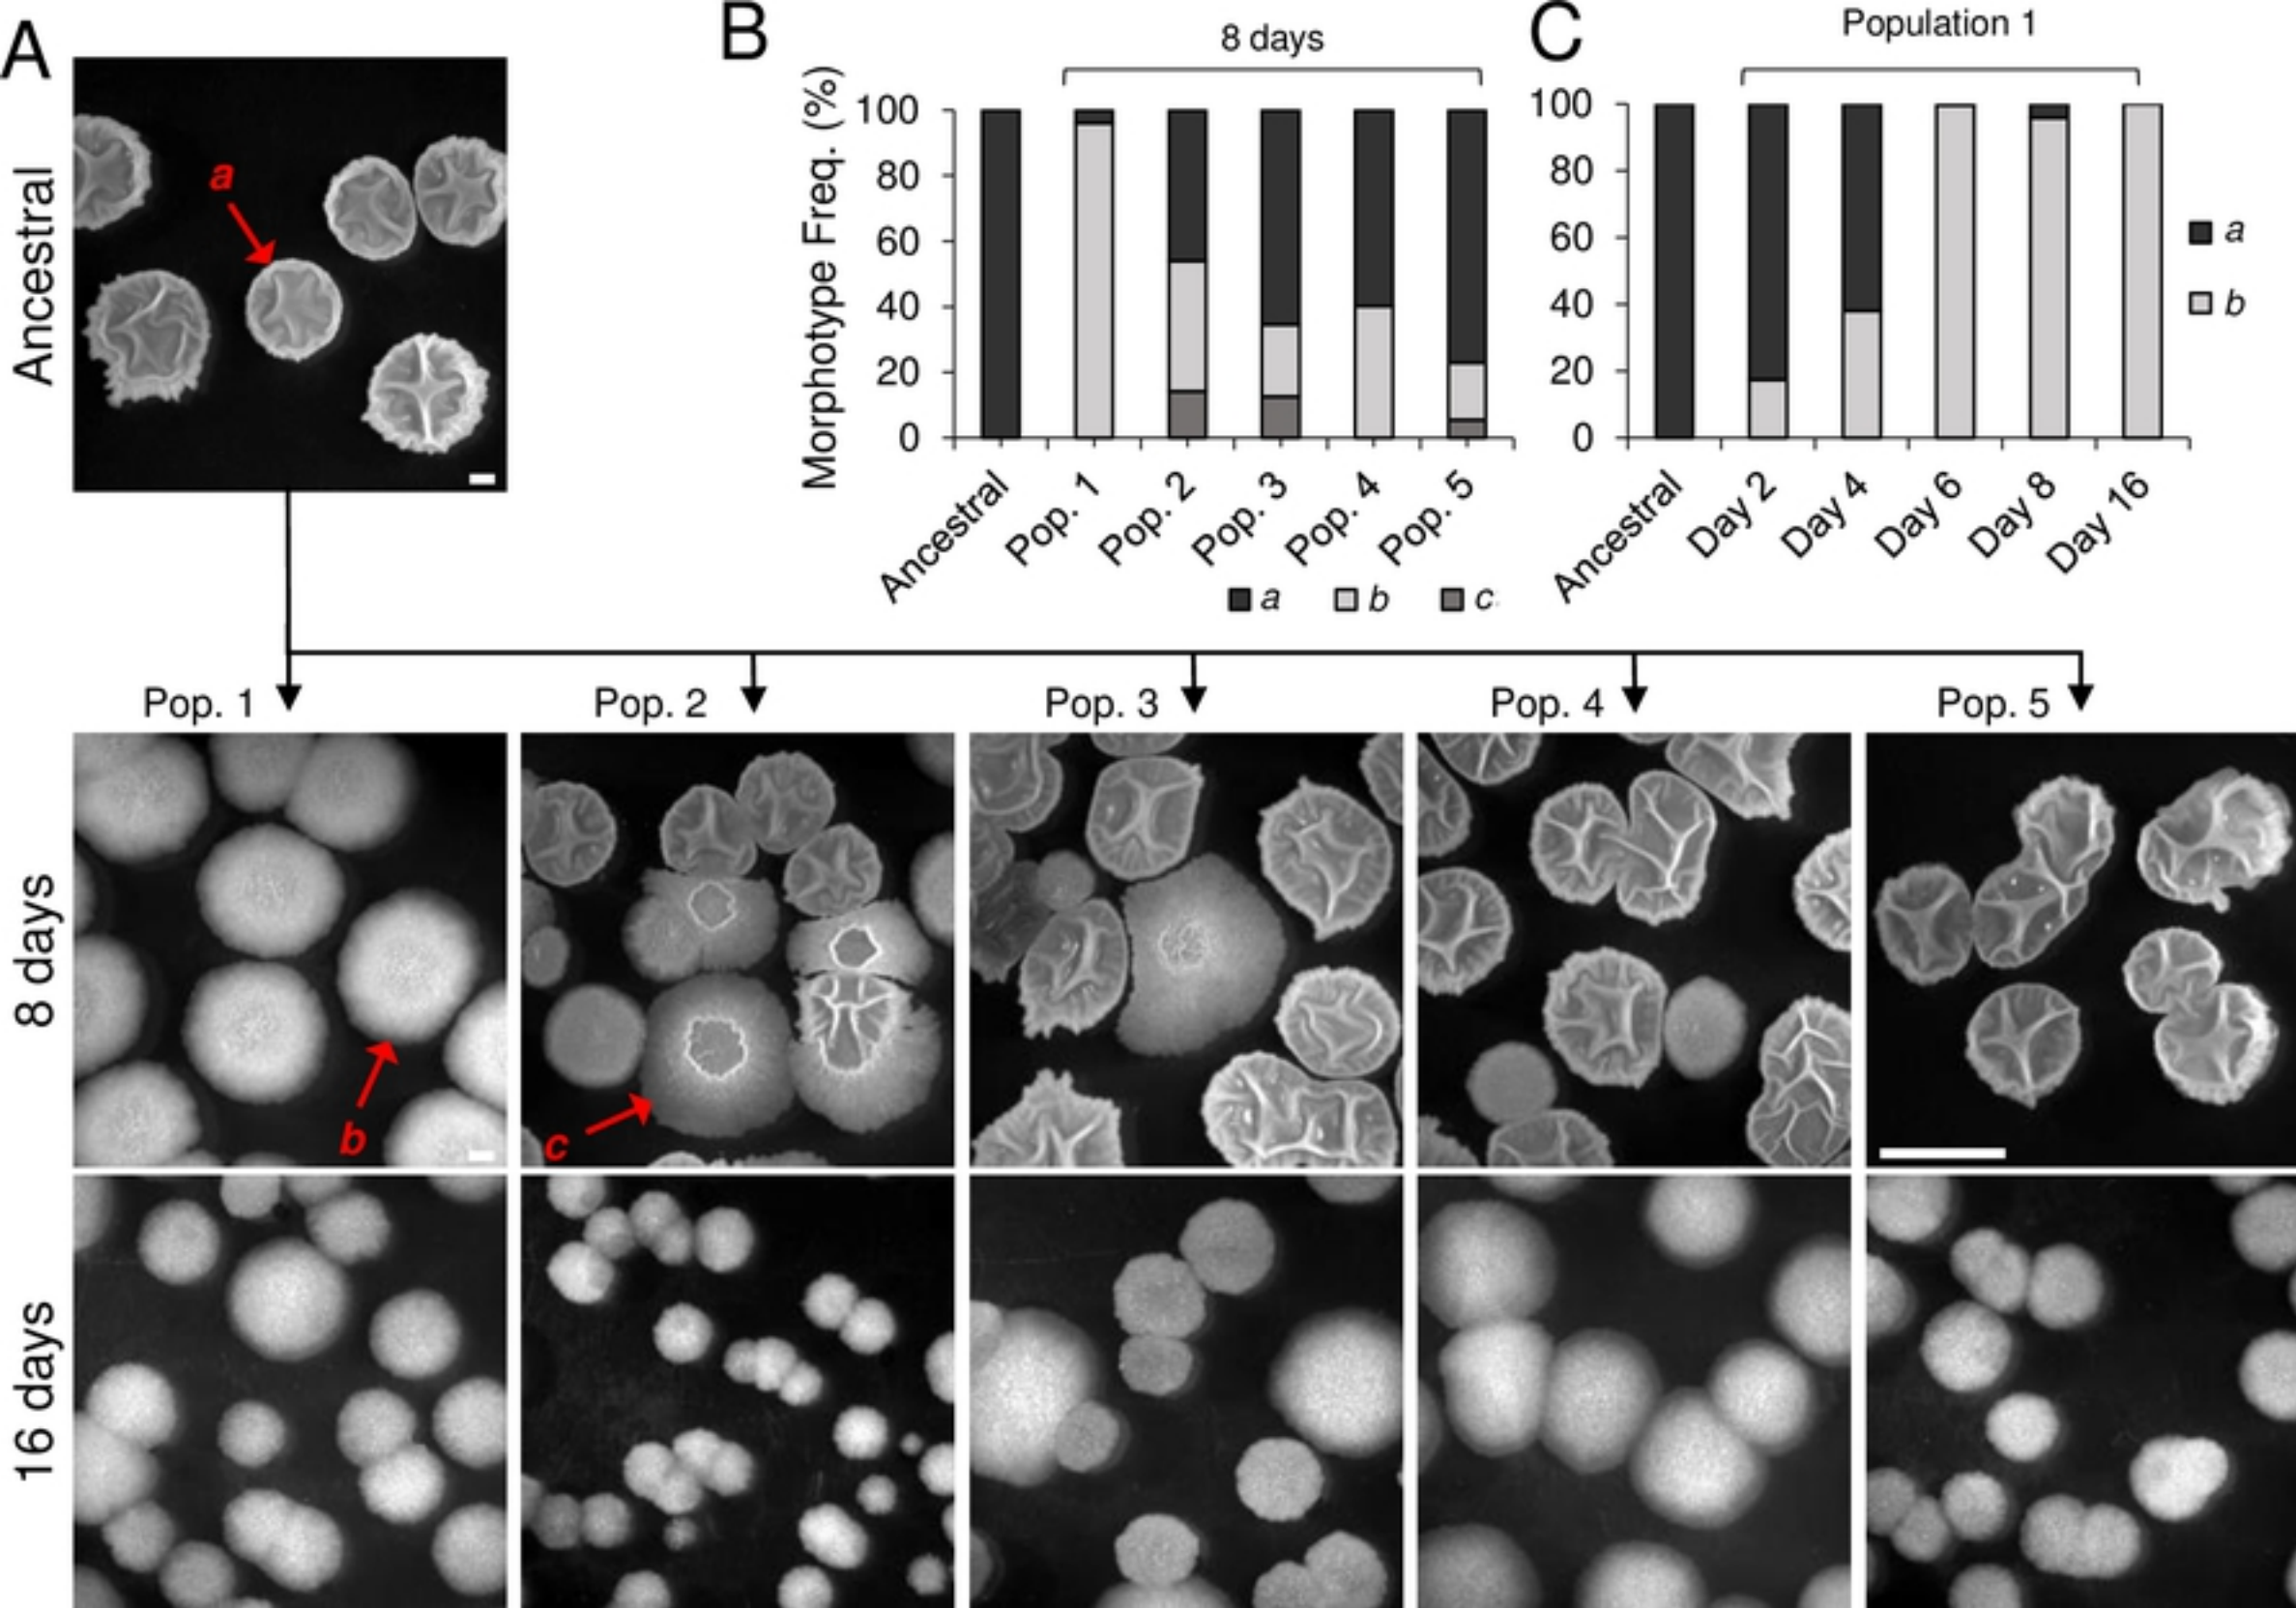

Figure 1

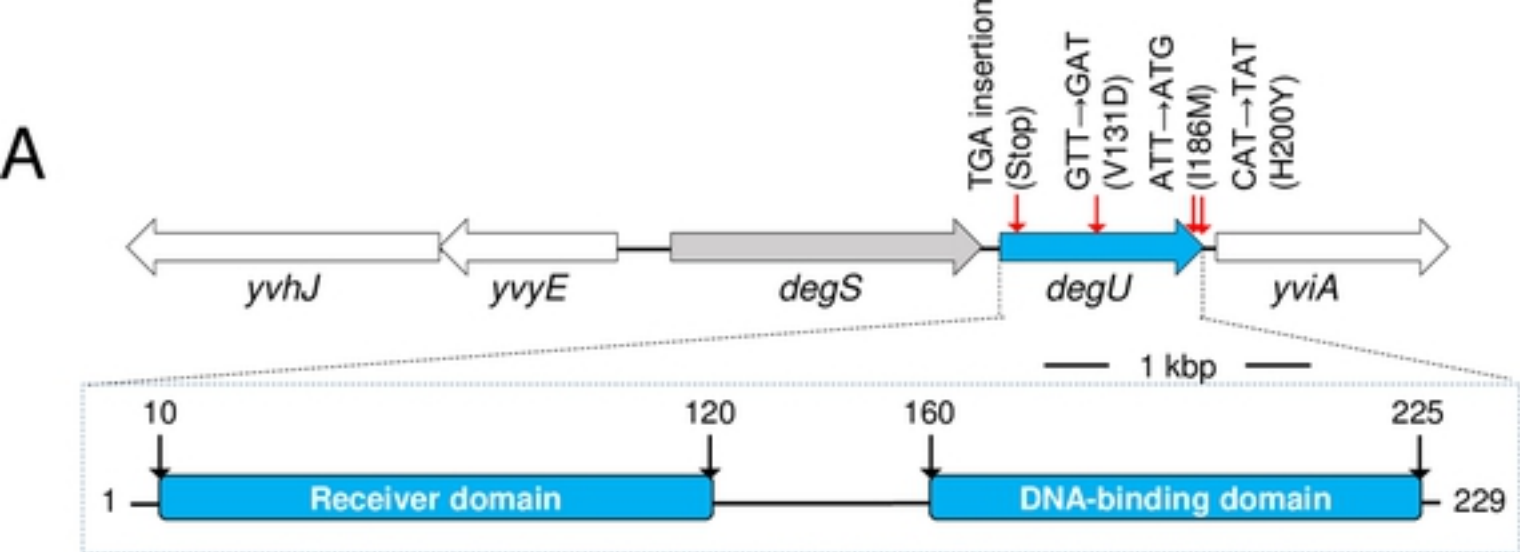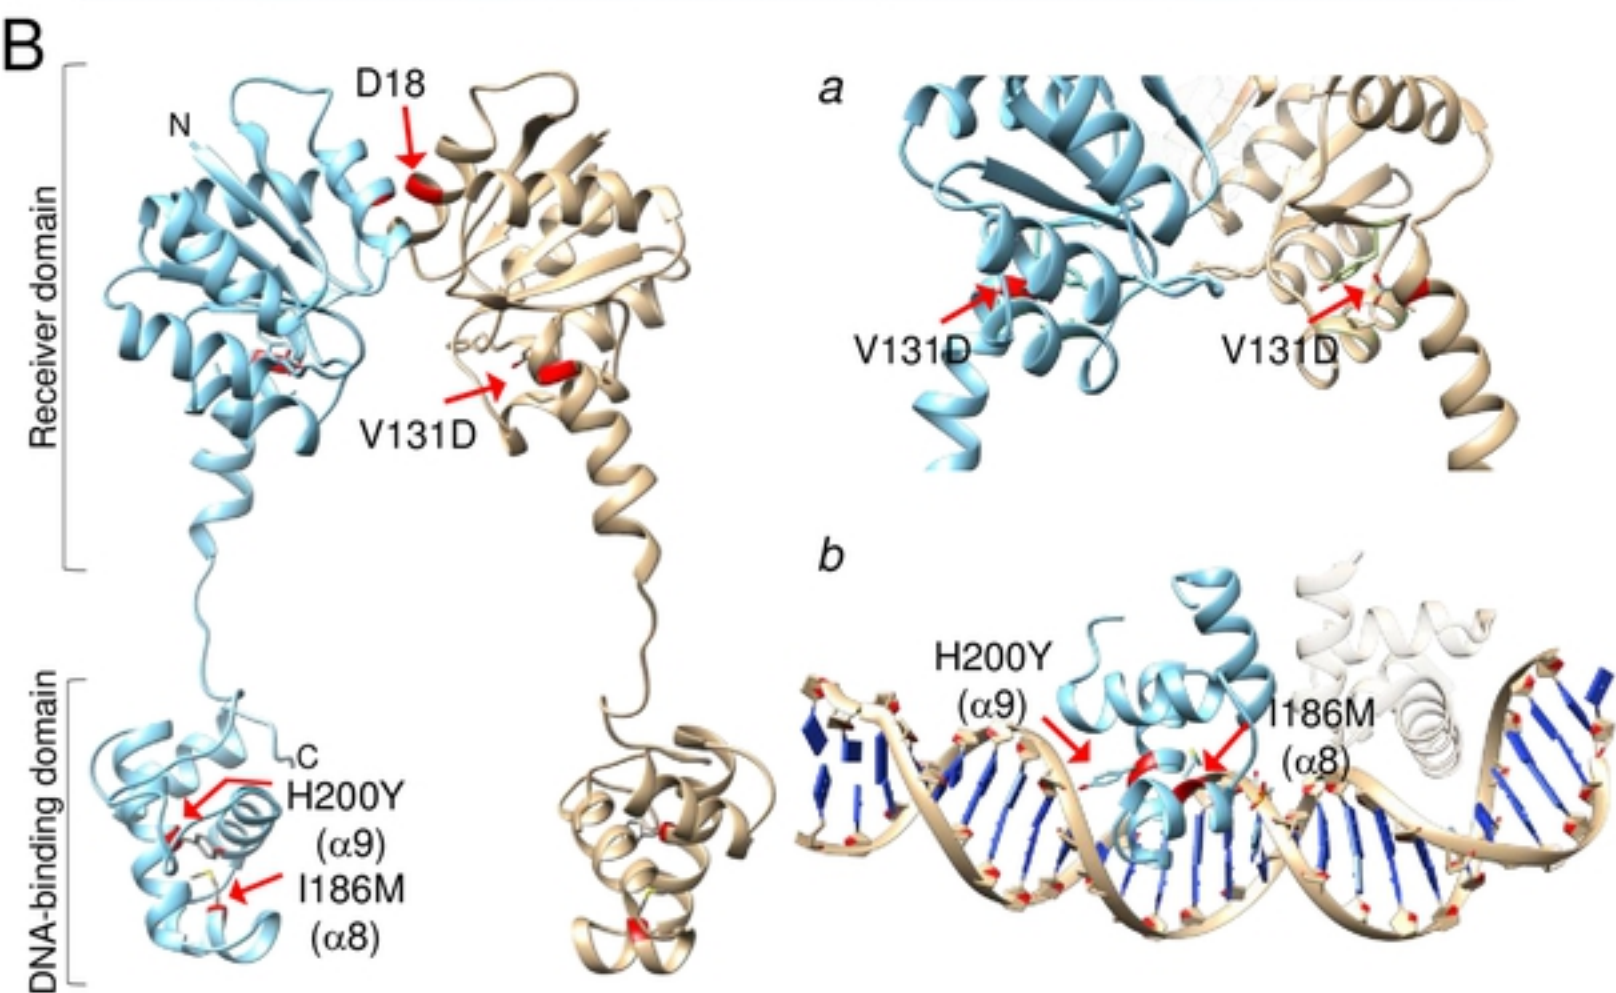

**C**

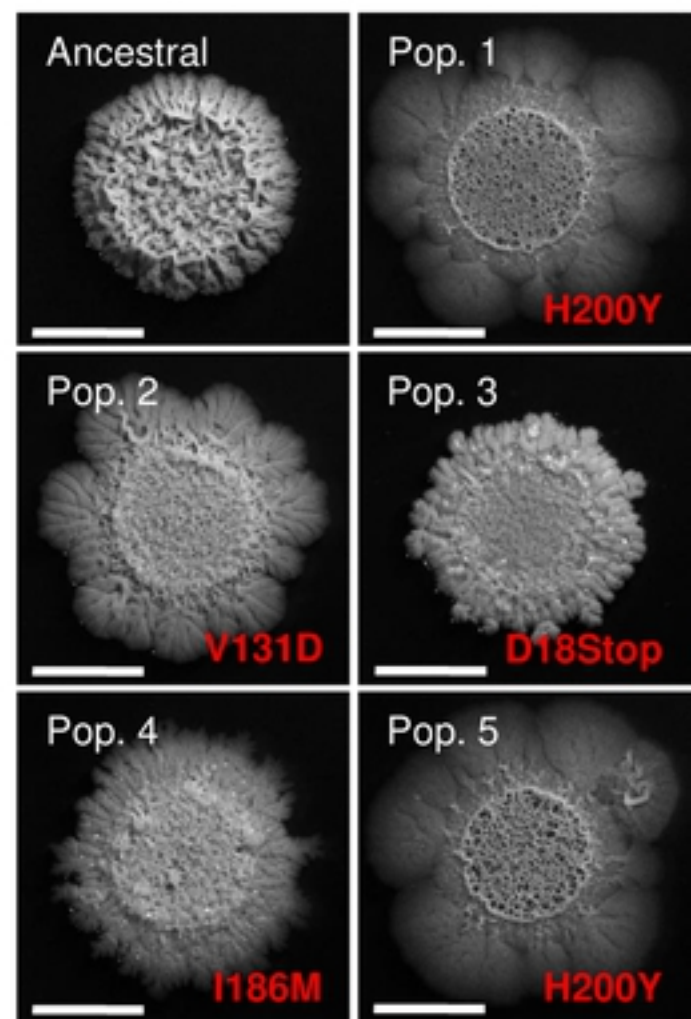

Figure 2



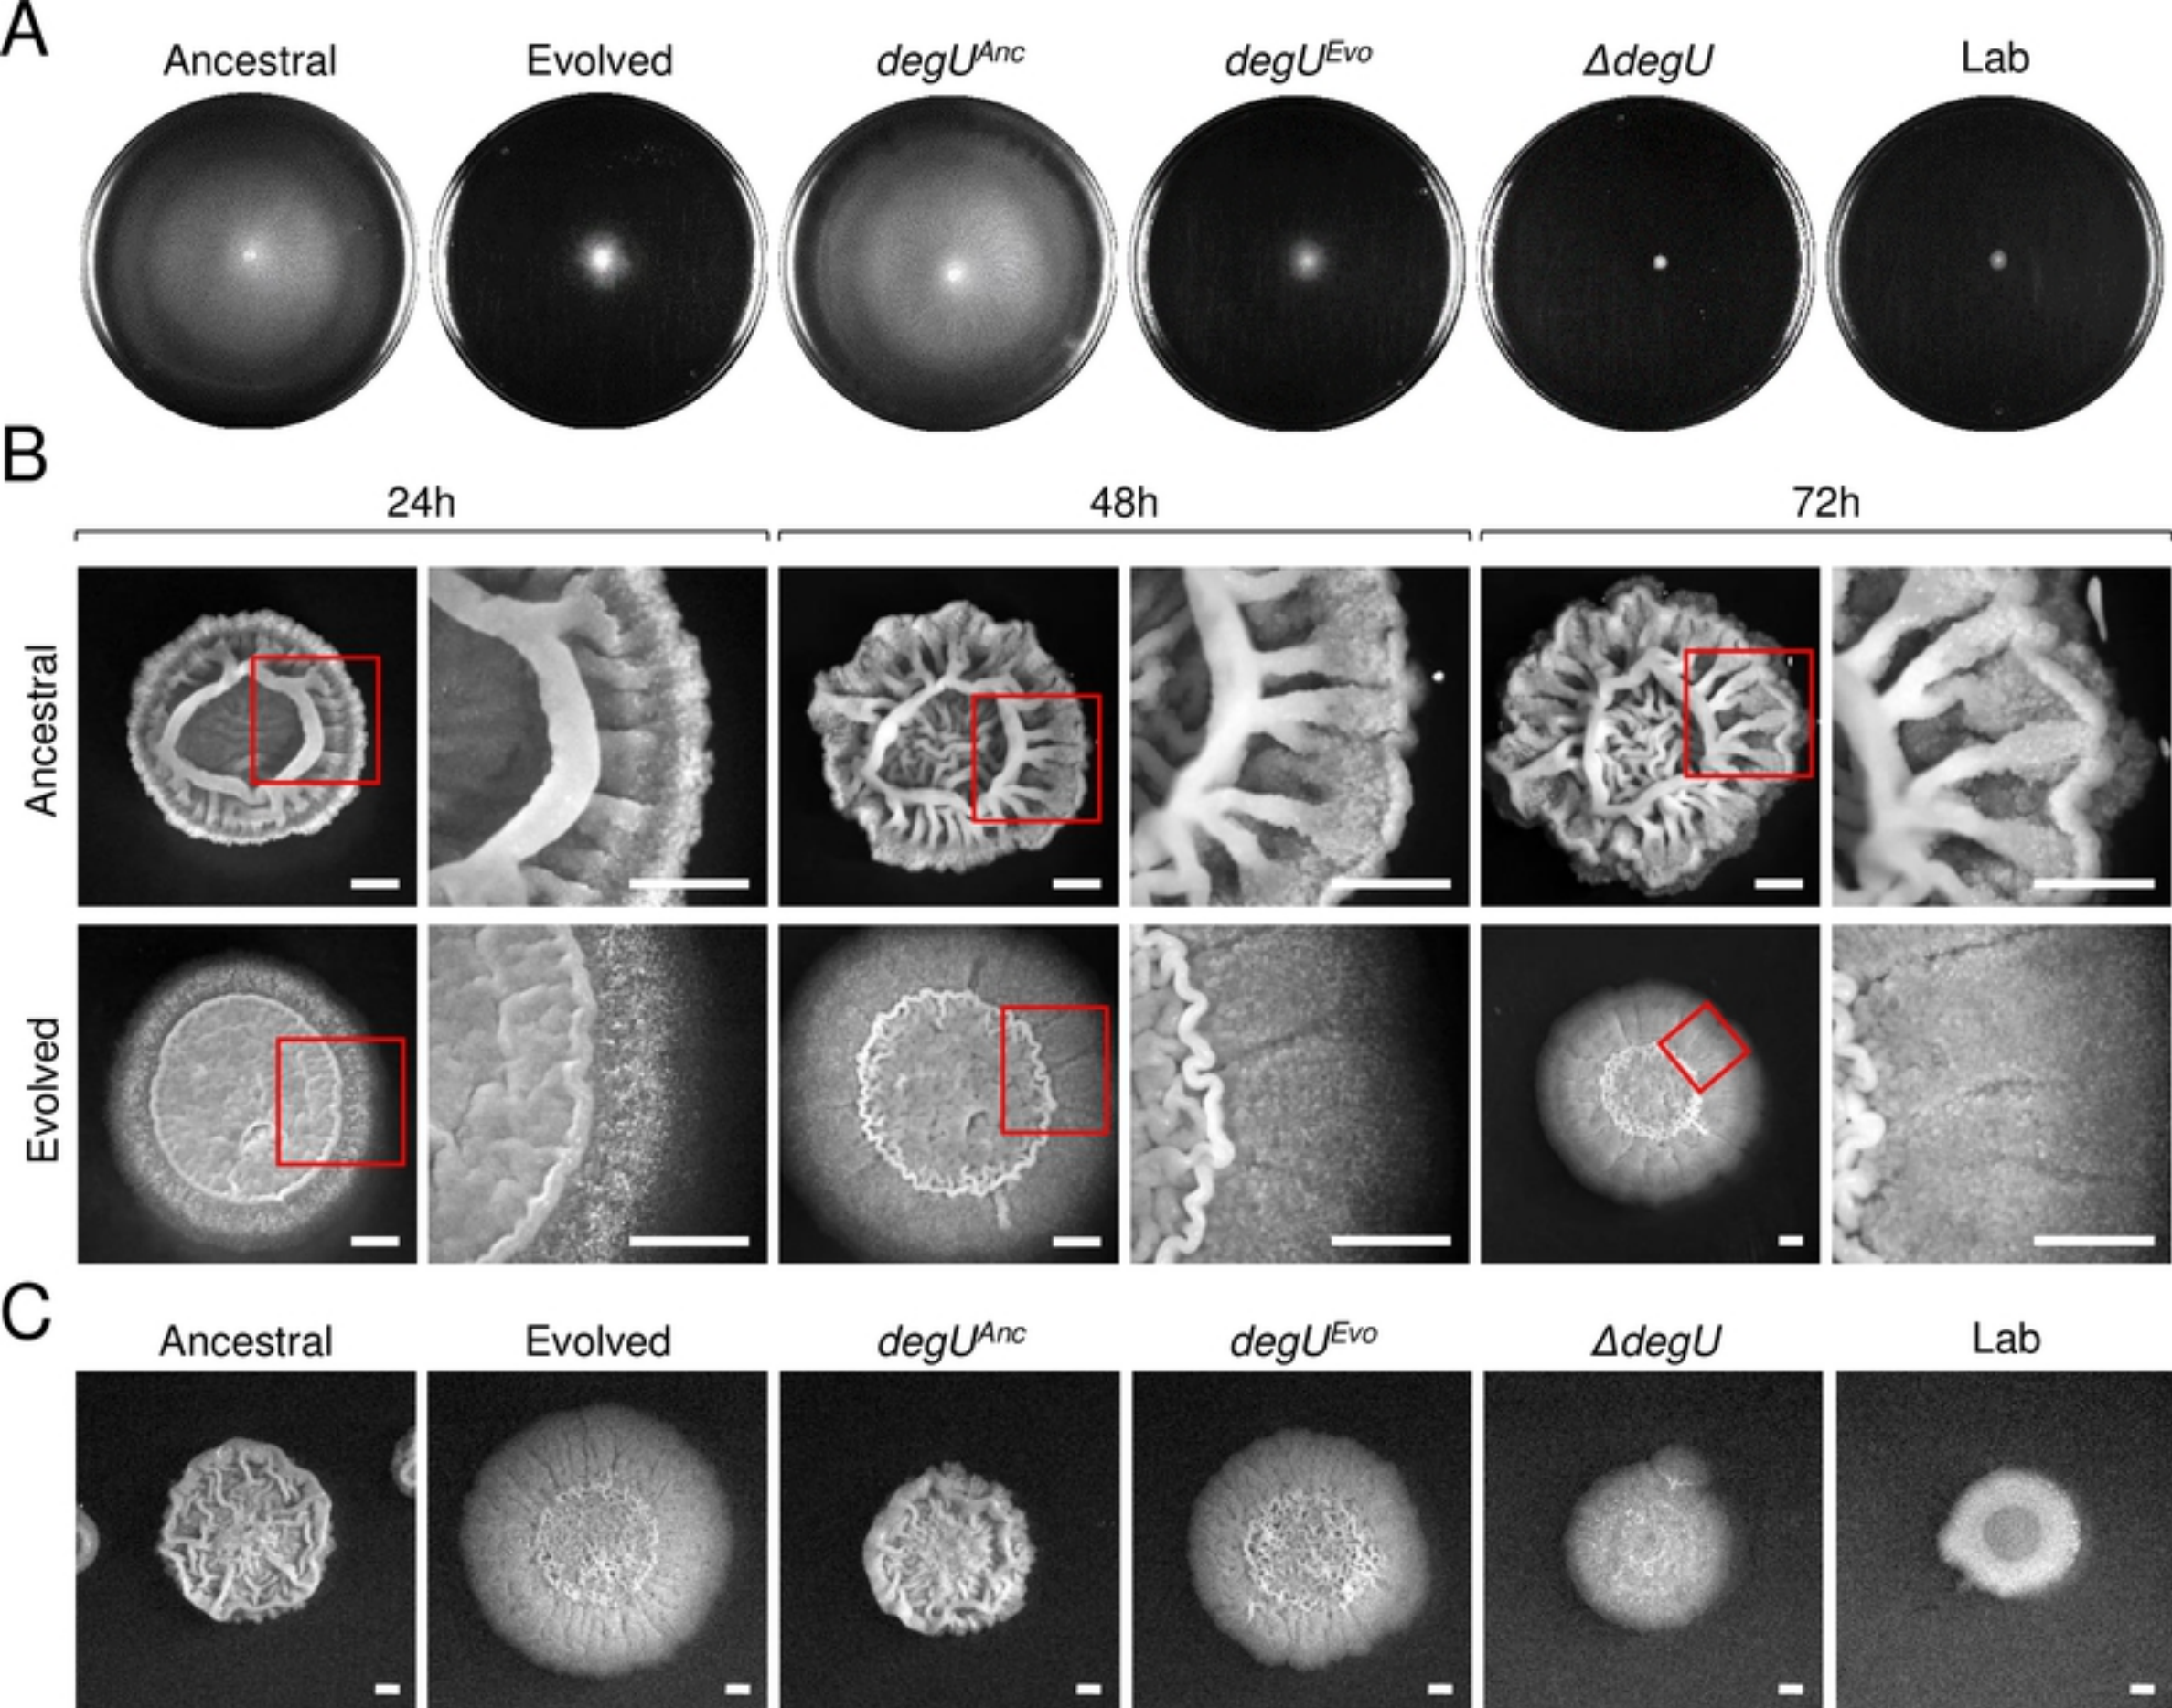

Figure 3

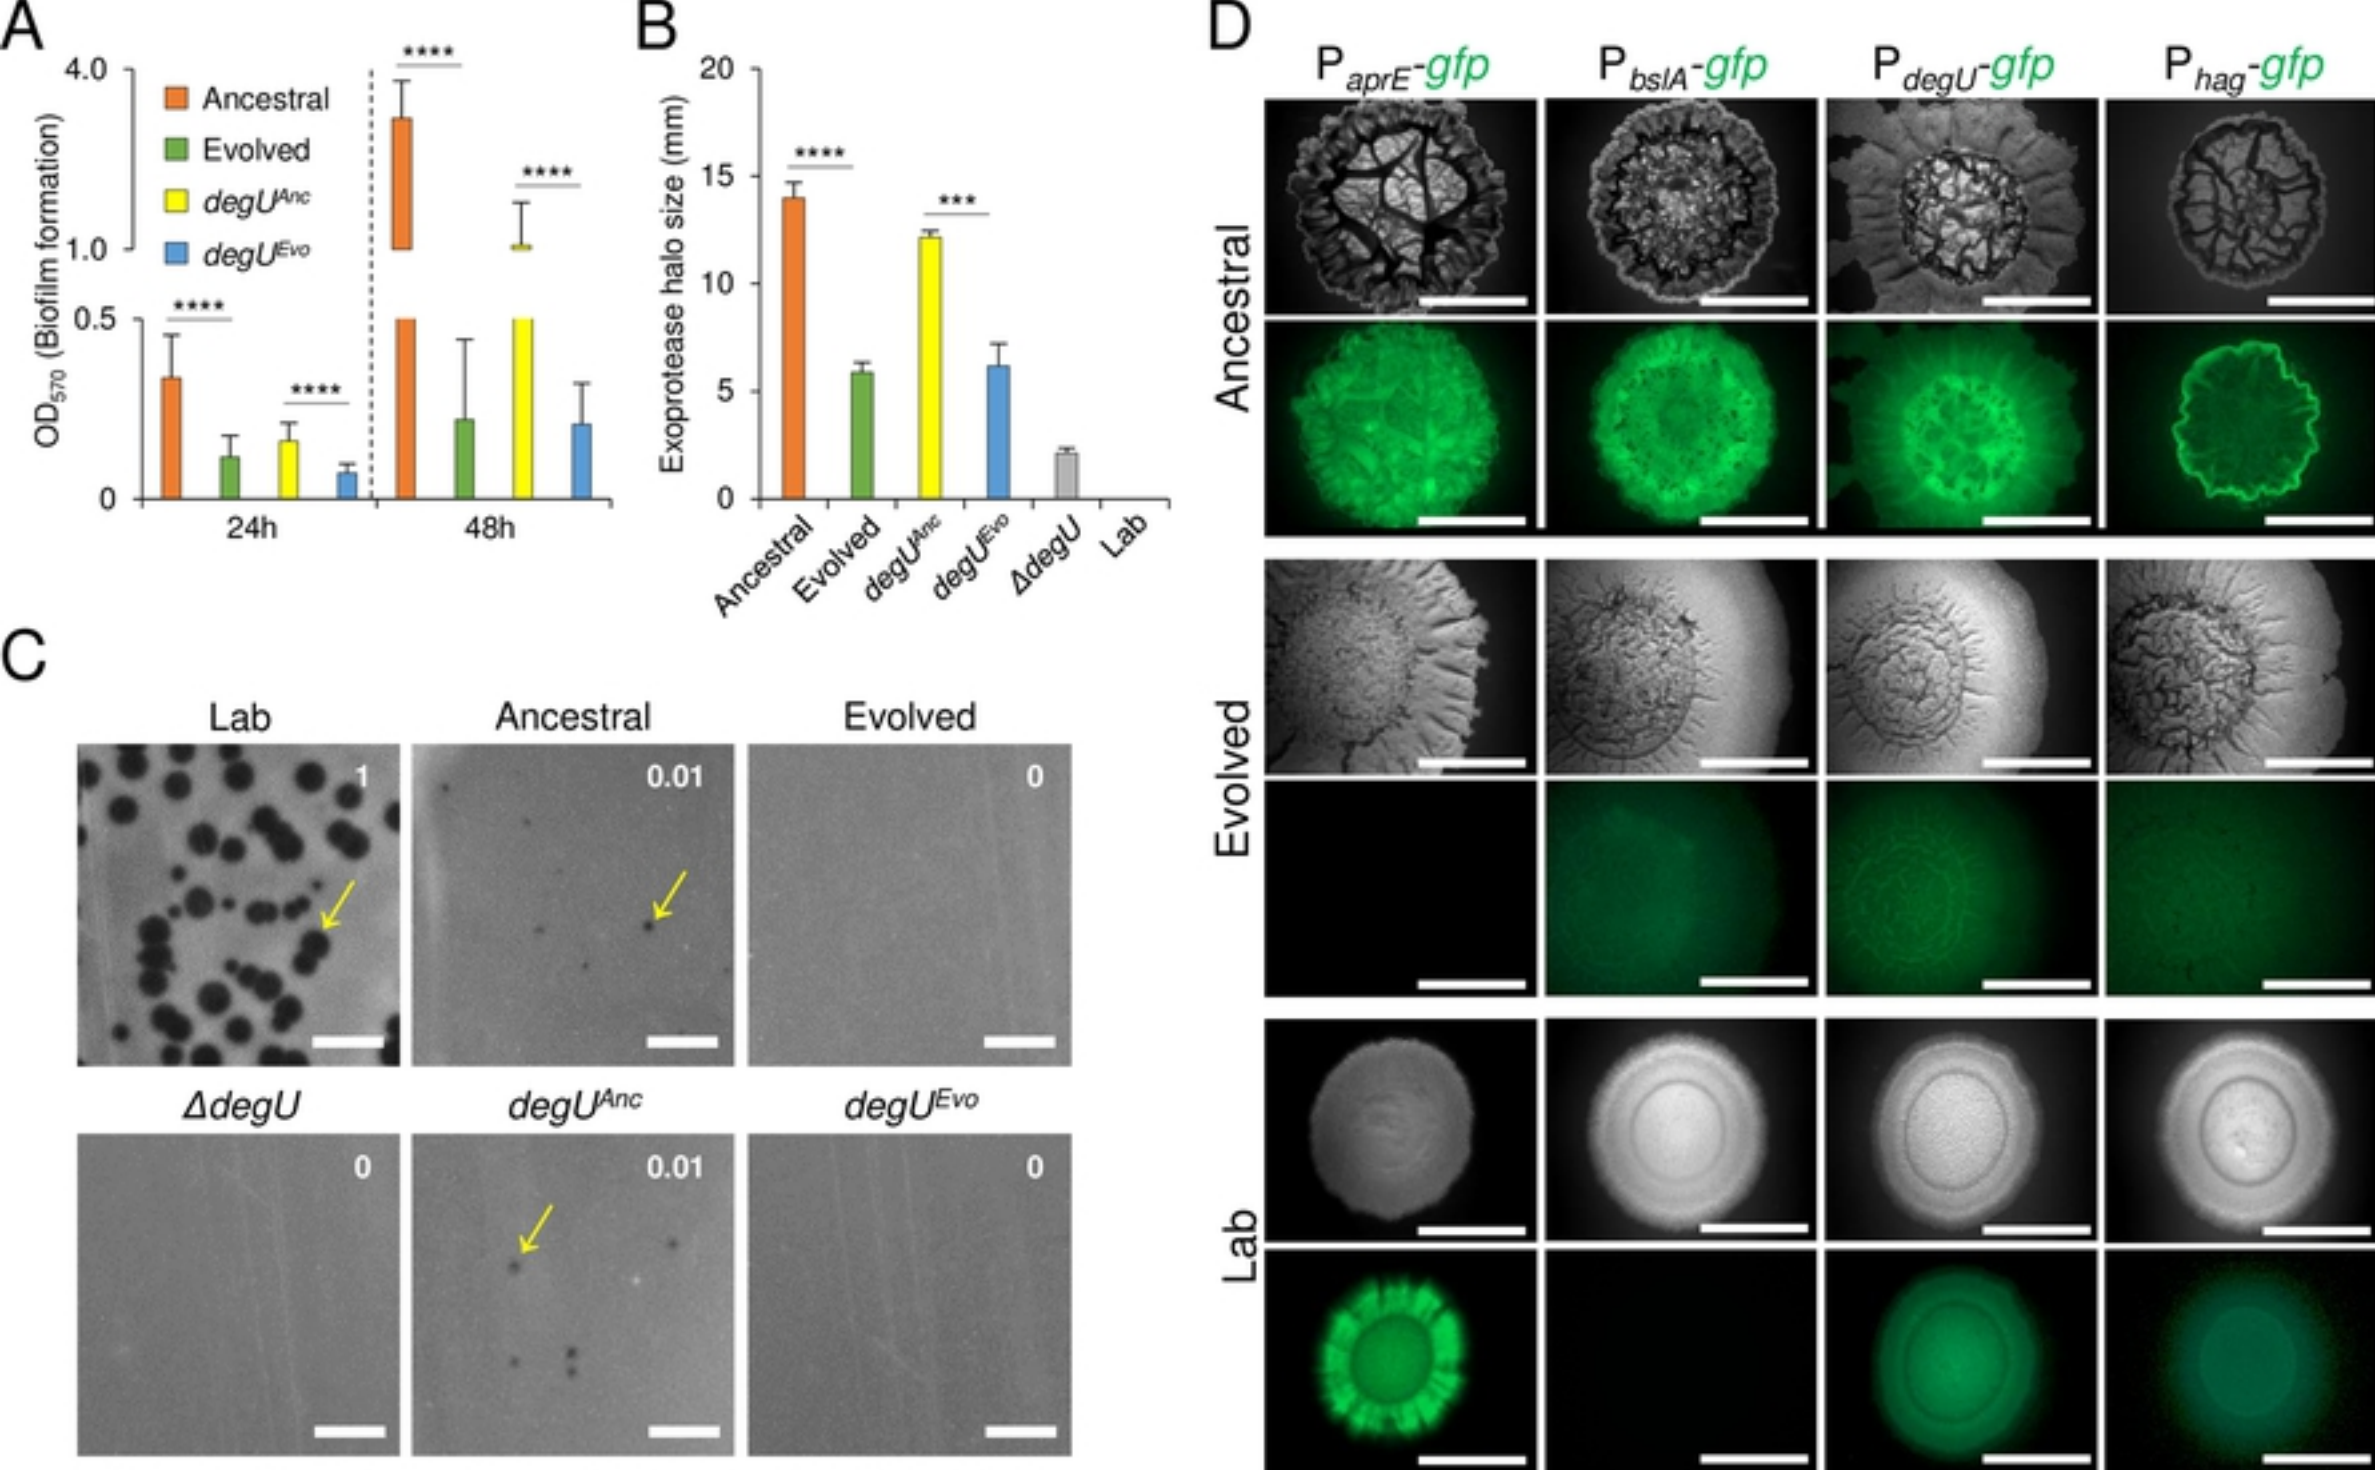

Figure 4

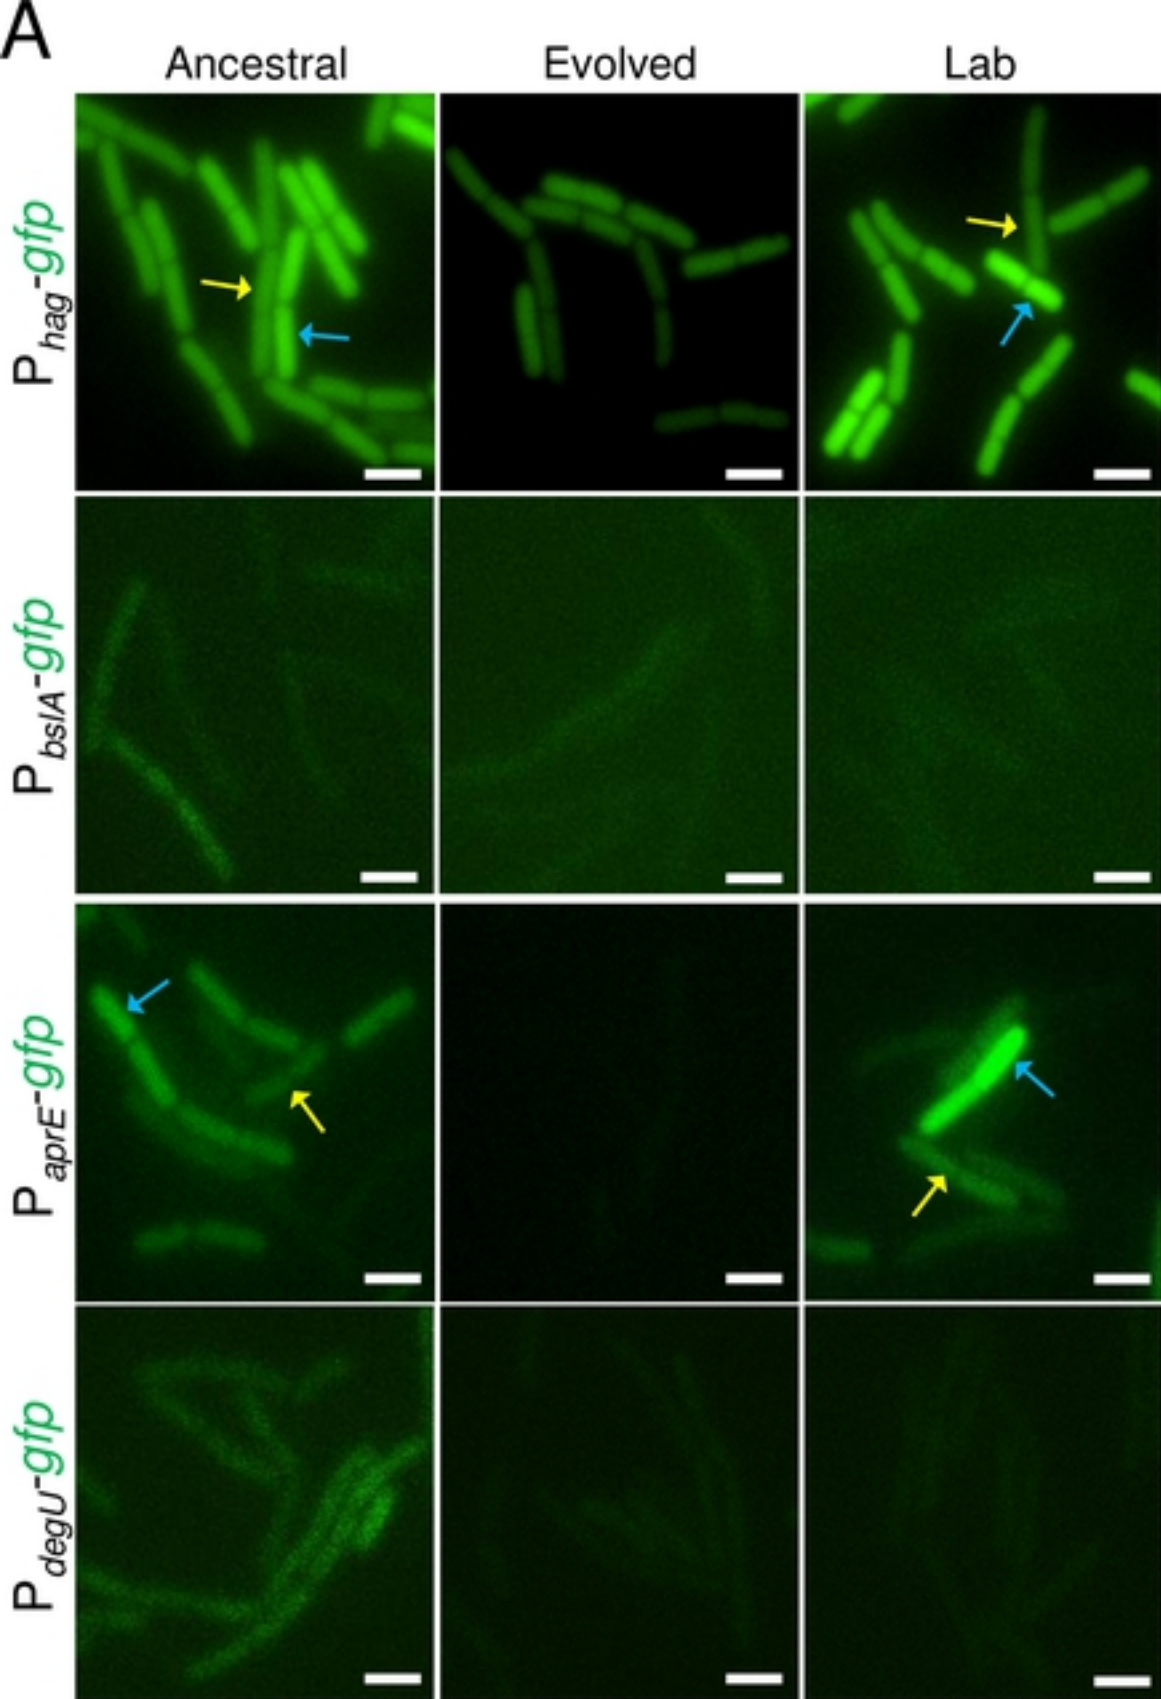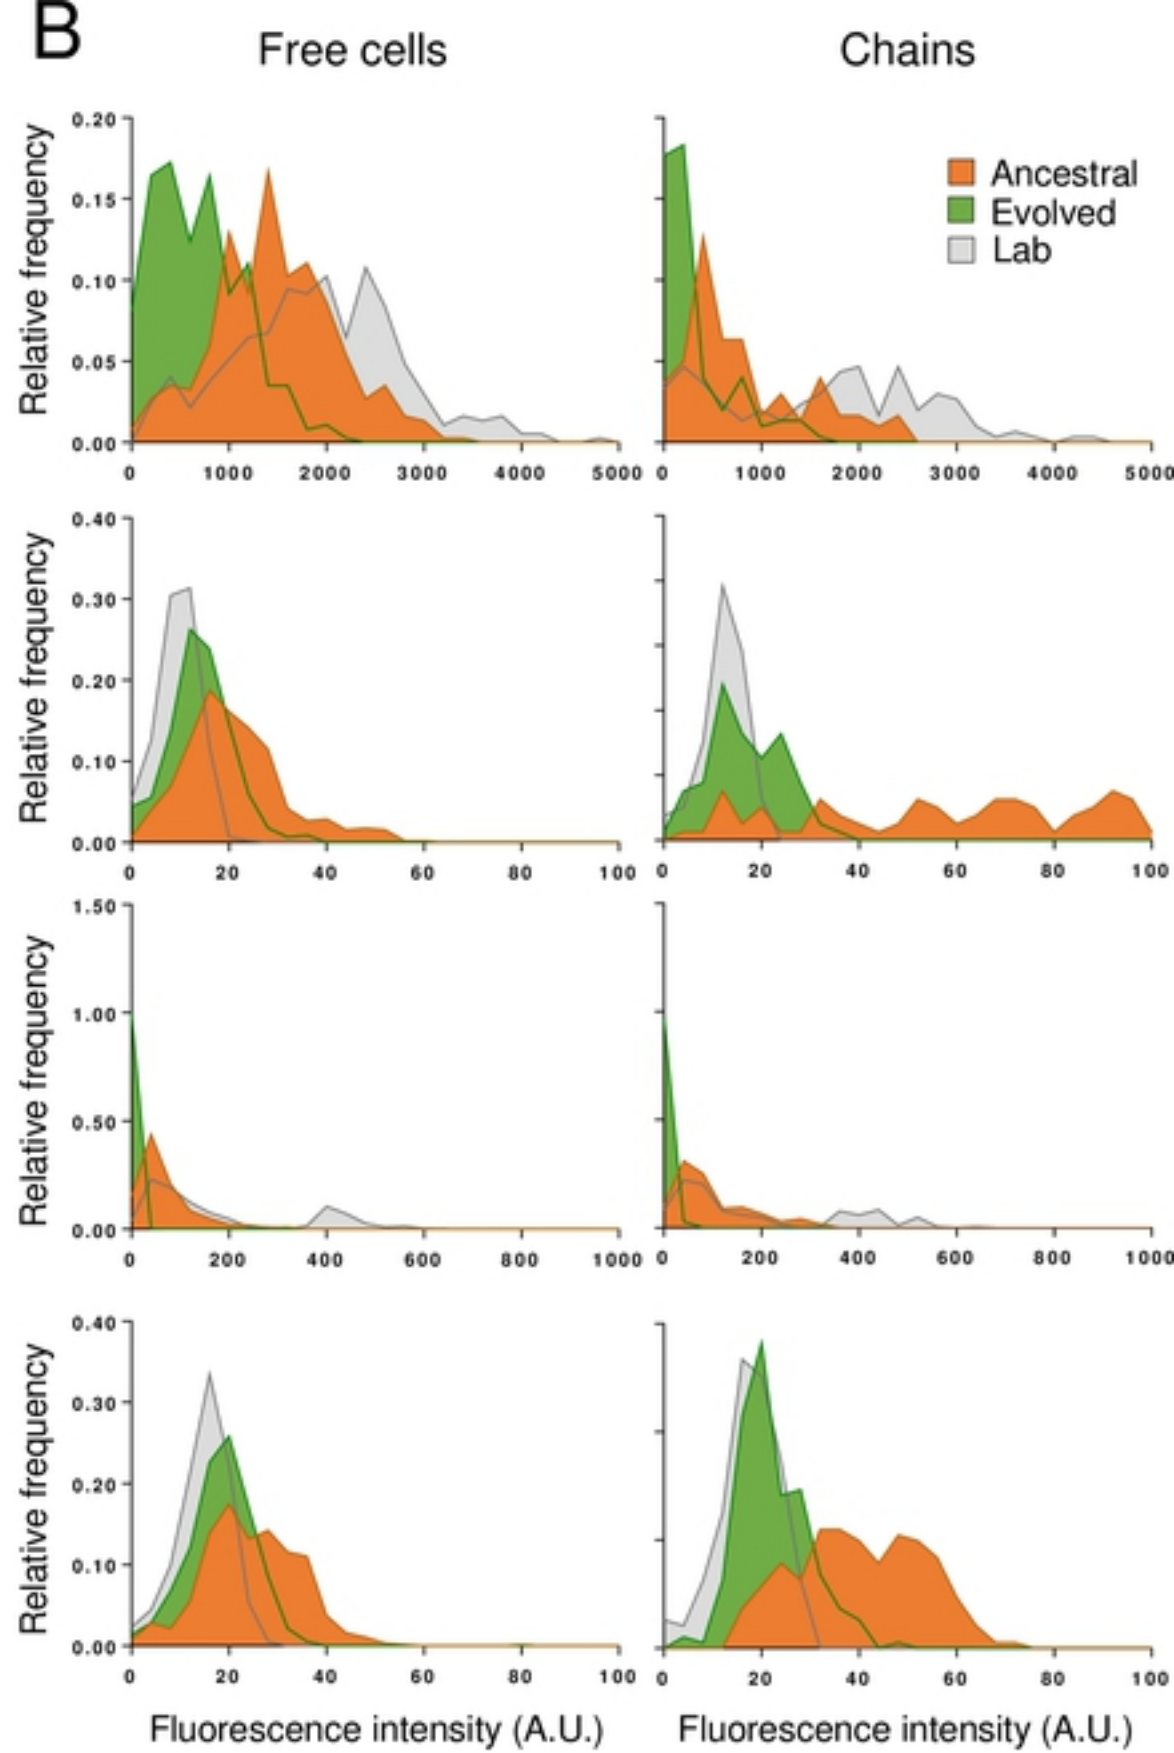

Figure 5

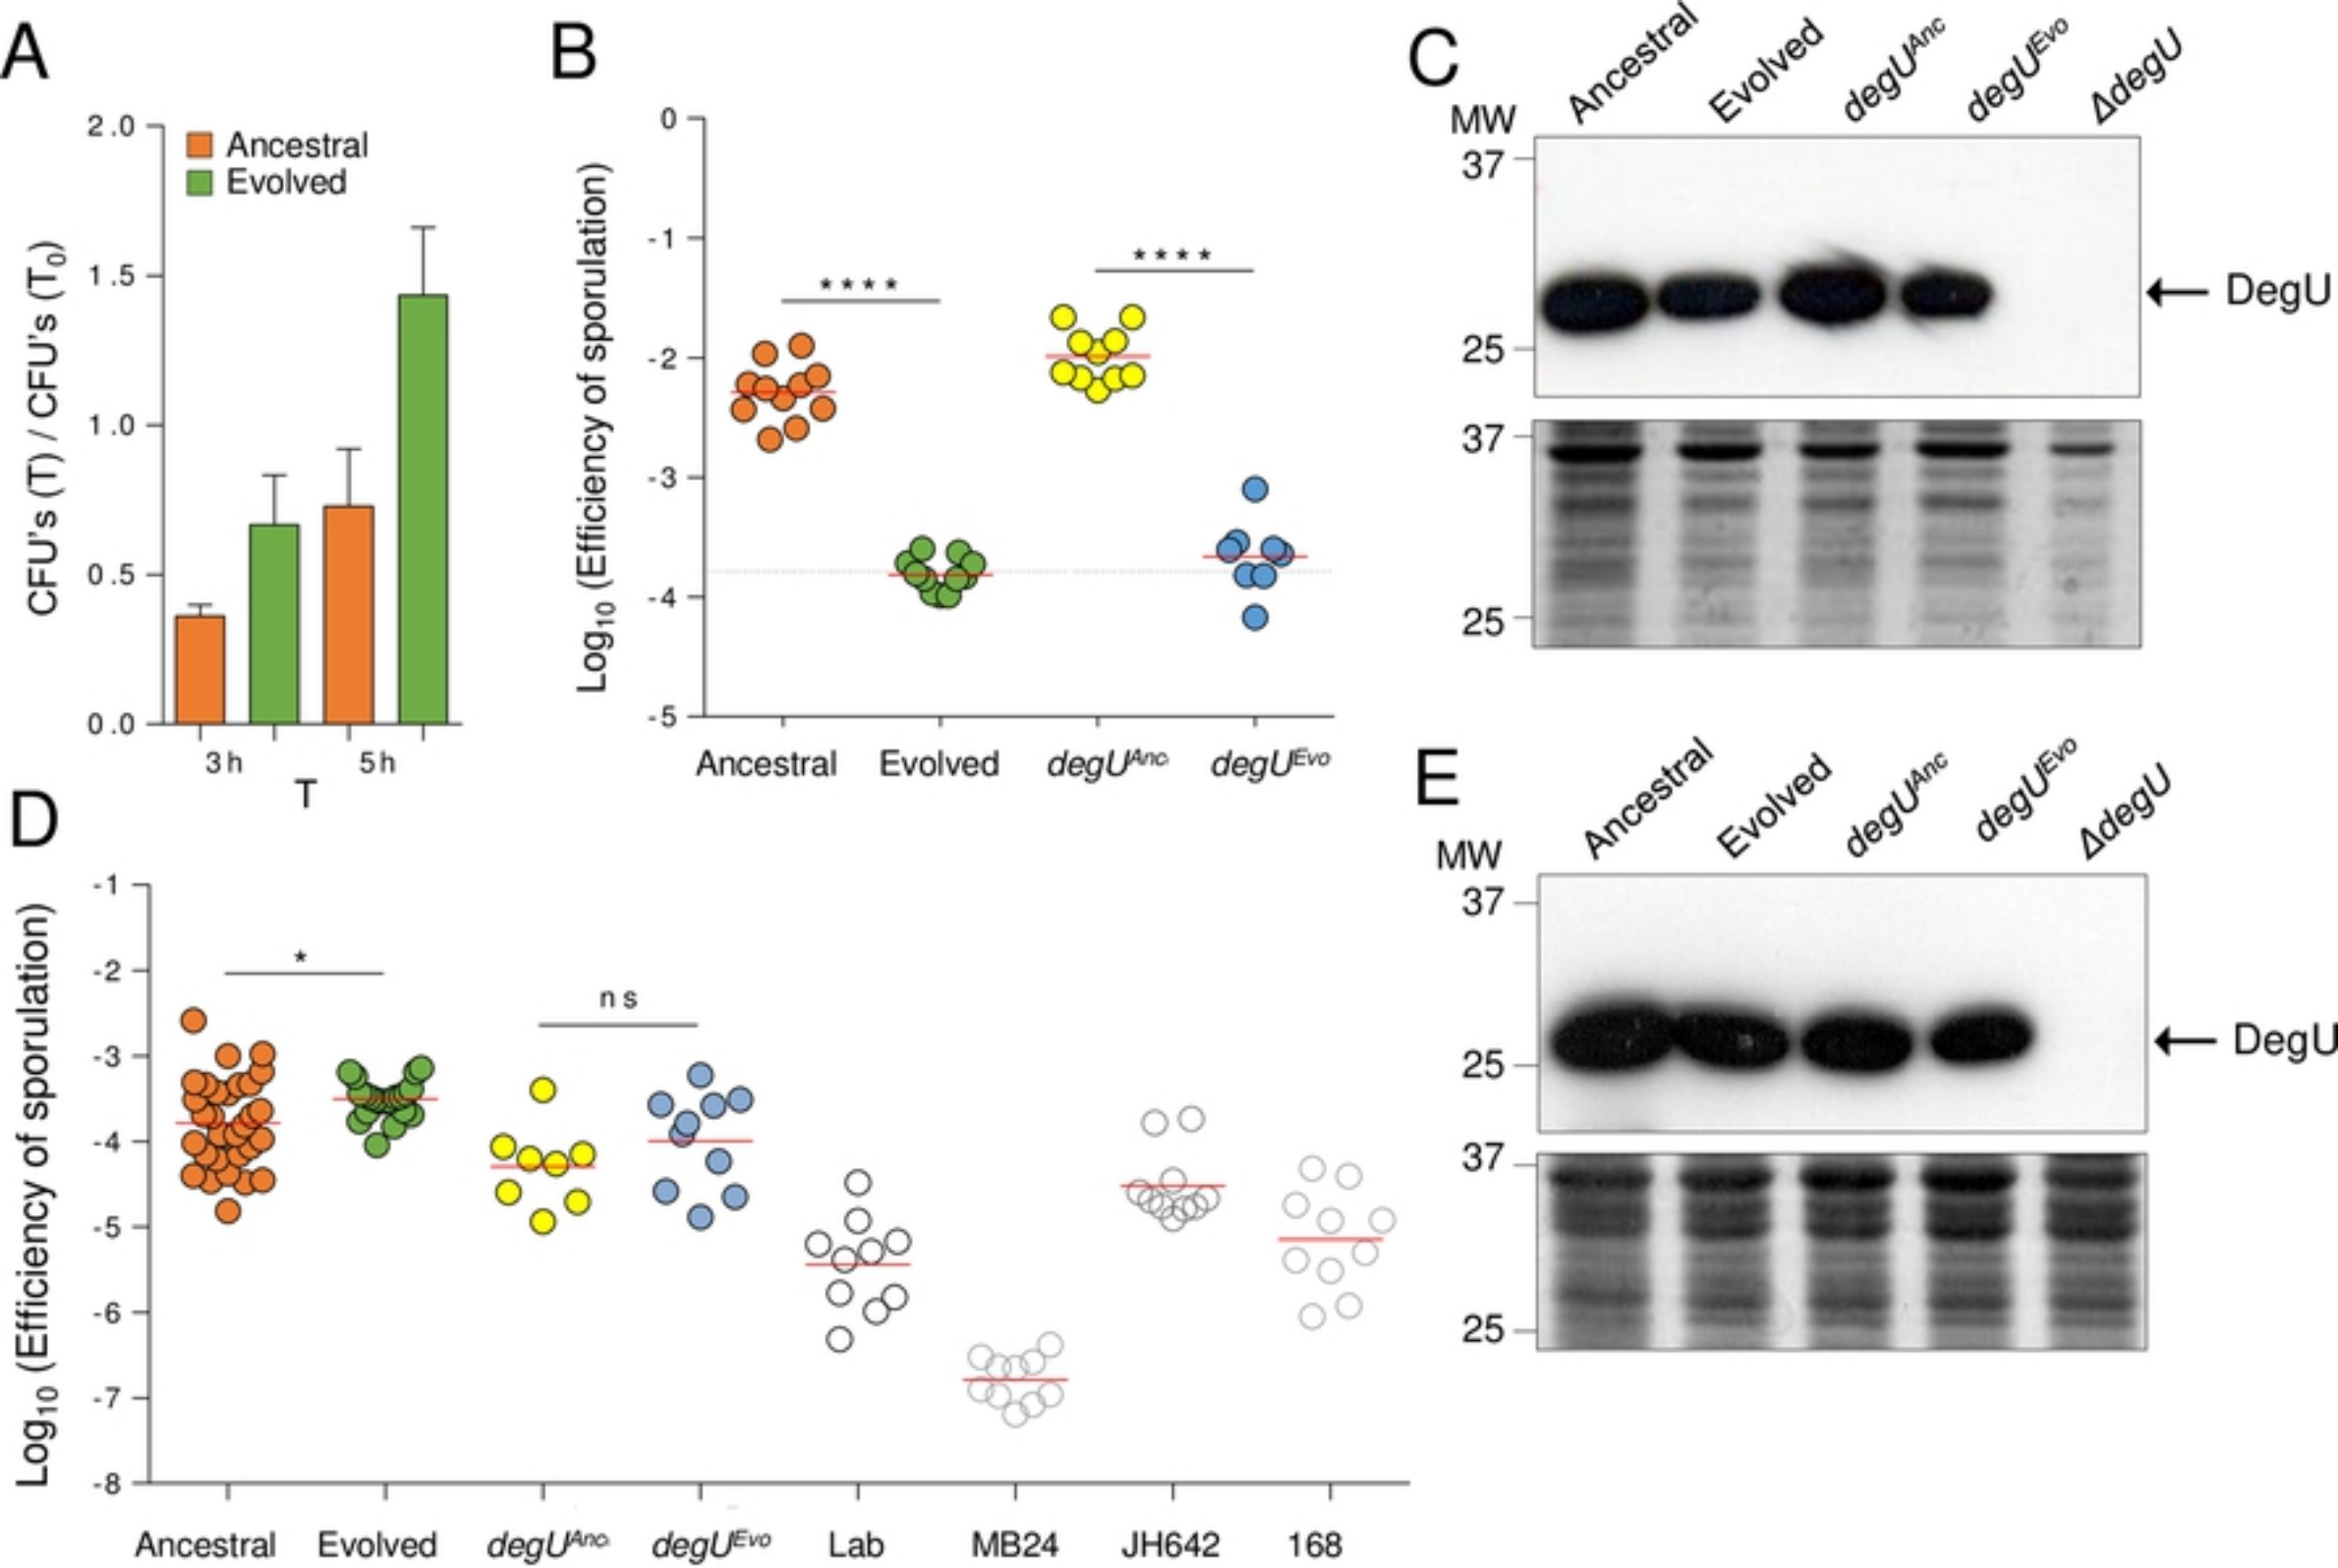

Figure 6
