1

2

3

4

## Rampant loss of social traits during domestication

5

### of a *Bacillus subtilis* natural isolate

6

7 Hugo C. Barreto<sup>1,2</sup>, Tiago N. Cordeiro<sup>2</sup>, Adriano O. Henriques<sup>2\*</sup>, and Isabel Gordo<sup>1\*</sup>

8

9

10

11 <sup>1</sup>Instituto Gulbenkian de Ciências, Oeiras, Portugal

12 <sup>2</sup>Instituto de Tecnologia Química e Biológica António Xavier, Universidade Nova de

13 Lisboa, Oeiras, Portugal

14

15

16

17

18 **Keywords:** DegU; experimental evolution; biofilm development; sporulation;

19 extracellular proteases.

20

21 \* **Corresponding author**

22 E-mail: igordo@igc.gulbenkian.pt (I.G.), aoh@itqb.unl.pt (A.O.H.)

## 23 **Abstract**

24 Most well-studied bacteria have been domesticated to some extent. How fast can a  
25 natural isolate diverge from its ancestral phenotypes under domestication to a novel  
26 laboratory environment is poorly known. Yet such information is key to understand rates  
27 of evolution, the time scale at which a natural isolate can be propagated without loss of  
28 its natural adaptive traits and the reliability of experimental results across labs. Using  
29 experimental evolution, phenotypic assays and whole-genome sequencing, we show  
30 that within a week of propagation in a common laboratory environment, a natural isolate  
31 of *Bacillus subtilis* acquires mutations that cause changes in a multitude of traits. A  
32 single adaptive mutational step, in the gene coding for the transcriptional regulator  
33 DegU, impairs a DegU-dependent positive autoregulatory loop and leads to loss of  
34 robust biofilm architecture, impaired swarming motility, reduced secretion of  
35 exoproteases and changes in the dynamics of sporulation across environments.  
36 Importantly, domestication also resulted in improved survival when the bacteria face  
37 pressure from cells of the innate immune system. These results show that *degU* is a key  
38 target for mutations during domestication and also underscore the importance of  
39 performing careful and extremely short-term propagations of natural isolates to  
40 conserve the traits encoded in their original genomes.

## 41 **Summary**

42 Domestication is the process by which organisms are selected to live in specific  
43 conditions and an important phenomenon that shapes the evolution and variation in  
44 many animals and plants. In microbes, domestication is also a key driver of adaptation.  
45 It can be beneficial, when improving microbes abilities that are important for  
46 biotechnology, but also problematic, especially when studying microbe-host interactions  
47 and the microbe's natural behavior. Using a natural isolate of *Bacillus subtilis*, we  
48 determined the speed and genetic basis of microbial domestication using experimental  
49 evolution. Within one week of growth in the common laboratory media, mutations in the  
50 pleiotropic transcriptional regulator, DegU, emerge and spread in the populations.  
51 These lead to loss of social traits, increased resistance to bacteriophages  
52 and increased survival in the presence of macrophages. The data highlights the  
53 extreme caution that is needed when culturing natural microbial isolates and may help  
54 explain why some key microbial social traits and behaviors may differ between different  
55 laboratories, even when studying the same strains.

## 56 Introduction

57 Most bacteria grown in the laboratory face environmental conditions that are  
58 distinct from those in their natural habitat. In its natural environment, hardly anywhere a  
59 bacterium would find a niche with plentiful nutrients and optimal aeration. Therefore,  
60 when sampled from the diverse natural world and subsequently cultured in the lab,  
61 bacteria can rapidly adapt and modify its original phenotypes. Such evolutionary  
62 domestication can result in increased fitness in the lab at the cost of loss of previous  
63 adaptations (1). Some studies in *Escherichia coli*, *Bacillus subtilis*, *Caulobacter*  
64 *crescentus*, and *Saccharomyces cerevisiae* have shown that adaptation to laboratory  
65 environments occurs via diverse genotypic paths, but some evolutionary parallelism has  
66 also been observed (2–5). The tempo and mode of evolution under domestication is still  
67 poorly known. Yet, it is important to quantify how many of the current model bacteria  
68 have taken undetermined domestication paths.

69 The model organism for spore-forming bacteria, *B. subtilis* strain 168, is known to  
70 have lost a plasmid and acquired mutations in *sfp*, *epsC*, *swrA*, and *degQ* during its  
71 laboratory life (6). These lead to loss of traits likely to be important for *B. subtilis* natural  
72 life cycle in the soil, root plants or the gastrointestinal tract of various organisms. Robust  
73 biofilm formation is one of such traits, but interestingly, some 168 strains and derivatives  
74 are still able to form complex biofilms (7). In addition, a study using genetic engineering  
75 introducing the mutated genes and the plasmid showed that it was possible to restore  
76 biofilm phenotypes exhibited by the parental less domesticated strain NCIB 3610 (6). Of  
77 note is the fact that the mutation in *degQ* leads to a decreased phosphorylation of DegU  
78 (8–10), which is a known regulator of social traits in *B. subtilis* (9, 11–13). The strain

79 NCIB 3610 is commonly used as a model for biofilm development. However, it was  
80 shown that this strain carries two mutations, one in *rapP* and the other in *dtd* (14), which  
81 lead to impaired biofilm formation (15, 16), rendering it less than an ideal model for *B.*  
82 *subtilis* strains with high capacity to form biofilms.

83 The ability to produce endospores (spores for simplicity) is another important trait  
84 of the life cycle of *B. subtilis*. Spores are highly resistant to external stresses and largely  
85 responsible for the widespread dissemination of *B. subtilis*. The production of spores is  
86 a response to extreme nutrient depletion and under laboratory conditions it is triggered  
87 at the onset of the stationary phase of growth (17). A recently characterized natural  
88 isolate of *B. subtilis*, BSP1, starts the process of spore formation during growth, unlike  
89 its domesticated relatives, and reaches a higher spore titer (18). This occurs as a result  
90 of the main activator of the sporulation process, Spo0A~P, reaching higher levels per  
91 cell and in a larger fraction of the population during exponential growth. Spo0A is  
92 activated by phosphorylation by means of a phosphorelay that integrates multiple  
93 environmental, cell cycle and nutritional cues (17, 18). The precocious and increased  
94 sporulation of BSP1 is due to the lack of two genes coding for Rap phosphatases, able  
95 to drain phosphoryl groups from the phosphorelay, through the dephosphorylation of  
96 Spo0F, a phosphorelay component (18). In accordance with the relevance of  
97 sporulation in *B. subtilis* natural life cycle is the fact that under continuous evolution in  
98 laboratory conditions a decrease and loss of capability to sporulate was observed (19–  
99 22)

100 The large number of traits that can potentially be lost during continuous growth of  
101 *B. subtilis* in classical laboratory environments and the lack of knowledge regarding its

102 first steps of adaptation makes it imperative to understand when and how the  
103 domestication occurs. Experimental evolution offers a powerful methodology to study  
104 the dynamics of the repeatability of evolutionary change under the same laboratory  
105 conditions and to study domestication (19, 23, 24). When coupled with genome  
106 sequencing, it allows a real-time assessment of the speed and genetic basis of  
107 adaptation to novel environments, as well as the order at which adaptive mutations fix in  
108 evolving populations (21, 25–29).

109         Here we have used experimental evolution to follow the evolutionary path taken  
110 by a natural isolate of *B. subtilis* during domestication to a common laboratory  
111 environment. We found that within one week (8 passages), mutations in *degU*, coding  
112 for a global transcriptional regulator (11, 12, 30), spread and cause a rapid change in  
113 several social traits of *B. subtilis*, likely to be important for its fitness in the wild (31).  
114 Using gene-editing we show that one of the *degU* mutations causes attenuation of  
115 swarming motility, reduction of biofilm production and alteration of its architecture,  
116 increased resistance to bacteriophage SPP1 infection and reduced exoprotease  
117 secretion. Importantly, the initial process of domestication also resulted in a change of  
118 the sporulation dynamics across environments and an increased survival when the  
119 bacteria face pressure from the innate immune system. DegU thus emerges as a  
120 central mutational target during domestication. Overall, our results indicate that the  
121 propagation of natural isolates in the laboratory should be performed with extreme care  
122 as domestication can lead to rampant loss of traits that while important for the *B. subtilis*  
123 natural life cycle are largely dispensable under laboratory conditions.

## 124 **Results**

### 125 **Emergence of a new adaptive colony morphology during *B. subtilis*** 126 **domestication.**

127 Five populations derived from a *B. subtilis* natural isolate (BSP1) hereinafter  
128 named Ancestral, were daily passaged for sixteen days, through dilution in a rich  
129 medium with agitation and aeration. Samples were frozen every two days so that  
130 evolutionary steps during short-term domestication could be followed through whole-  
131 genome sequencing. Daily plating revealed that, within the first week of the experiment,  
132 two new colony morphotypes emerged (Fig. 1A). The ancestral type *a* dominated the  
133 initial populations, but a new type *b*, characterized by a flat colony morphotype, and a  
134 type *c*, an intermediate morphotype, reached appreciable frequencies rapidly. Type *b*  
135 was detected in all the populations, while type *c* was only observed in three out of five  
136 populations (Fig. 1B). As type *b* achieved the highest frequency, reaching fixation after  
137 sixteen days in population 1 (Fig. 1C), we conducted a detailed phenotypic and genetic  
138 characterization of one clone from this population. The rapid spread of type *b*, as well as  
139 its repeated emergence, suggests that it carries an advantage when growing in the  
140 laboratory environment. To test this hypothesis, we selected a type *b* colony from  
141 population 1 at day eight, hereinafter named Evolved, and characterized its growth in  
142 LB. Indeed both the maximum growth rate per hour and the carrying capacity after 7  
143 hours of growth of the Evolved were significantly higher than those of the Ancestral (Fig.  
144 S1A and B). This shows that Evolved has increased growth traits in the laboratory  
145 environment.

### 146 **DegU as a main target for the adaptation to the laboratory environment.**

147 To determine the genetic basis of the adaptive morphotype we performed whole-  
148 genome sequencing of the Ancestral and the Evolved clone. Only one mutation was  
149 observed, in the *degU* gene, coding for the response regulator DegU (32). The non-  
150 synonymous mutation is a T-to-G transition causing the substitution of isoleucine 186, in  
151 the helix-turn-helix motif (HTH), within the DNA-binding domain of DegU, by a  
152 methionine (I186M) (32) (Fig. 2A). *degU* is part of the *degS-degU* operon, coding for a  
153 two-component system that controls social behaviors in *B. subtilis* (9, 11–13).  
154 Interestingly, the laboratory strain 168 is known to have a mutation in *degQ* that leads to  
155 a decreased phosphorylation of DegU (8–10). This suggested that the I186M  
156 substitution could cause an adaptive change capable of affecting several traits. In the  
157 laboratory strain of *B. subtilis* the unphosphorylated form of DegU activates genes  
158 involved in the ability to uptake external DNA during competence development (33).  
159 During growth, the intracellular concentration of the phosphorylated form of DegU  
160 (DegU~P), increases, leading to the progressive activation of genes required for  
161 swarming motility, biofilm formation and the secretion of extracellular enzymes (9, 34).  
162 Given the central importance of DegU in processes that could be costly in the laboratory  
163 environment we tested whether additional clones of the natural isolate BSP1, that had  
164 evolved independently, also carried mutations in *degU*. Sanger sequencing revealed  
165 that all the five clones isolated from each population had mutations in *degU*: in addition  
166 to the mutation causing the I186M substitution (Evolved, in population 1; see above),  
167 the same mutation was identified in a clone from population 4; a mutation causing the  
168 substitution of histidine 200 by a tyrosine (H200Y) was identified in two populations (in  
169 population 1 and in population 5), and another, causing the replacement of valine 131



170 by an aspartate (V131D) was identified in one (population 2) (Fig. 2A and B). Finally,  
171 one mutation caused the insertion of a TGA codon leading to premature translation  
172 arrest after codon D18 (Fig. 2A and C; population 3). These populations exhibited  
173 distinct colony morphologies but all appeared less structured than the colonies formed  
174 by Ancestral (Fig. 2C). The V131D substitution lies within the linker region that  
175 separates the receiver and DNA-binding domains of DegU, while H200Y (as for I186M;  
176 above) is located in the HTH motif (Fig. 2B). All of the missense mutations affect amino  
177 acid residues that are conserved among DegU orthologs (Fig. S2A and B) and are thus  
178 likely to be functionally important. In particular, the I186M and H200Y substitutions are  
179 likely to affect DNA binding (Fig. 2A; see also Text S1 for a discussion of the effect of  
180 the various substitutions). These results suggest a high degree of evolutionary  
181 parallelism at the gene level and implicate DegU as the first main target of  
182 domestication to the laboratory for the natural isolate BSP1.

### 183 **The I186M substitution in DegU is responsible for the colony phenotype of** 184 **Evolved.**

185 We proceeded with a detailed characterization of the Evolved from population 1  
186 which carried a I186M substitution in DegU. To test whether this mutation caused the  
187 alteration in colony morphology, the wildtype *degU* allele (or *degU<sup>Anc</sup>*, for Ancestral) and  
188 the allele coding for DegU<sup>I186M</sup> (found in population 1, or *degU<sup>Evo</sup>*) were introduced  
189 ectopically at the non-essential *amyE* gene in a strain bearing a *degU* knockout  
190 constructed in the background of Ancestral (Fig. S3; see also Text S1). The resulting  
191 strains, termed *degU<sup>Anc</sup>* and *degU<sup>Evo</sup>*, had a colony morphology indistinguishable from

192 Ancestral and Evolved /  $degU^{Evo}$  respectively (Fig. 3C). We infer that the  $degU^{Evo}$  allele  
193 is responsible for the colony phenotype of Evolved.

194  **$degU^{186M}$  causes adaptive loss of major social traits.**

195 In commonly used laboratory strains of *B. subtilis*, such as 168 and NCIB 3610,  
196 several social traits are regulated by the unphosphorylated form as well as by low,  
197 medium or high levels of DegU~P (12, 30). DegU functions as a “rheostat”, sensing  
198 environmental signals and allowing the expression of competence, social motility (or  
199 swarming), biofilm development and exoprotease production along a gradient in the  
200 cellular accumulation of Deg~P (12). Competence development is positively regulated  
201 by the unphosphorylated form of DegU (33, 35, 36). ComK is a regulatory protein  
202 required for competence development that drives transcription of the genes coding for  
203 the DNA uptake and integration machinery but also stimulates transcription of its own  
204 gene (37). Unphosphorylated DegU functions as a priming protein in competence  
205 development by binding to the *comK* promoter and facilitating ComK stimulation of  
206 *comK* transcription at low ComK concentrations (33, 37, 38). Given this, we proceeded  
207 to test if these phenotypes observed in laboratory strains were also regulated by DegU  
208 in the natural isolate strain BSP1, as well as the effect of the I186M substitution in the  
209 Evolved. We found no differences in the development of competence between  
210 Ancestral or  $degU^{Anc}$  and Evolved or  $degU^{Evo}$  (Fig. S4). This suggests that the I186M  
211 substitution does not affect the function of the unphosphorylated form of DegU in  
212 promoting competence development and thus that  $degU^{Anc}$  is not a loss-of-function  
213 allele. Low levels of DegU~P, however, activate transcription of genes involved in social  
214 motility, or swarming (9, 11, 39, 40). Swarming motility assays revealed that while the

215 Ancestral and *degU*<sup>Anc</sup> have the ability to swarm, the Evolved and *degU*<sup>Evo</sup> show poor  
216 swarming ability (Fig. 3A). A widely used laboratory strain, PY79, hereinafter termed  
217 Lab, as well as other laboratory strains, carry mutations that prevent swarming motility  
218 (41–43). In our assay, Lab as well as a *degU* insertional mutant, are deficient in  
219 swarming motility (Fig. 3A). Thus, the I186M substitution leads to limited pleiotropic  
220 effects, *i.e.*, decreased swarming motility without affecting competence.

221 The production of proteins responsible for biofilm formation is another trait under  
222 the control of DegU~P (8, 9, 11, 44, 45). To query whether biofilm architecture and  
223 robustness were affected by the I186M substitution, we examined both the colony  
224 architecture over time, the colony being a biofilm formed at the solid medium/air  
225 interface, as well as the formation of biofilms at the liquid/air interface in liquid cultures.  
226 Both Ancestral and *degU*<sup>Anc</sup> showed a complex colony architecture characterized by  
227 many wrinkles after 24 h of incubation, and the complexity of the colony architecture  
228 increased with time during the assay (Fig. 3B). In contrast, Evolved and *degU*<sup>Evo</sup> formed  
229 colonies that tended to be flatter and with fewer wrinkles (Fig. 3B and C). As a control,  
230 colonies formed by a *degU* insertional mutant show extremely low complexity and  
231 compared to Ancestral, Lab also formed colonies with a simpler architecture (Fig. 3C).  
232 These results are consistent with the importance of DegU for the formation of a biofilm  
233 at a solid medium/air interface (44, 45). Similarly, in liquid cultures, both Evolved and  
234 *degU*<sup>Evo</sup> formed a biofilm at the liquid/air interface less robust than that of the Ancestral  
235 as determined by the quantification of the pellicle formed (Fig. 4A and Fig. S5). Thus,  
236 *degU*<sup>Evo</sup> affects the ability of *B. subtilis* to form complex, robust biofilms.

237 Other processes important for *B. subtilis* social natural lifestyle that depend on  
238 high levels of DegU~P include the secretion of exoproteases and survival under  
239 bacteriophage predation (12, 39, 46, 47). We found decreased exoprotease secretion in  
240 Evolved and the *degU<sup>Evo</sup>* strain, as compared to Ancestral and *degU<sup>Anc</sup>* (Fig. 4B). For  
241 reference, exoprotease secretion was severely impaired in both the *degU* insertional  
242 mutant and in Lab (Fig. 4B). Lastly, when infected with the bacteriophage SPP1, both  
243 Evolved and *degU<sup>Evo</sup>* showed increased resistance to phage infection, as compared to  
244 Ancestral and *degU<sup>Anc</sup>* or Lab (Fig. 4C). Overall, these results show that in the natural  
245 isolate BSP1, as in the laboratory strain, DegU is a key regulator of social traits. They  
246 also reinforce the view that the *degU<sup>Evo</sup>* mutation is pleiotropic but not fully, as it affects  
247 the phenotypes regulated by DegU~P, including social mobility, biofilm formation,  
248 exoprotease production and resistance to phage infection, but does not impair the  
249 function of unphosphorylated DegU in priming competence.

#### 250 **Decreased transcription of DegU~P-target genes after domestication.**

251 The phenotypic assays performed showed that in the natural isolate BSP1 the  
252 I186M substitution in DegU changed traits regulated by DegU~P in the first steps of  
253 domestication. The location of the I186M substitution in the HTH motif of DegU raised  
254 the possibility that the transcription of genes regulated by DegU~P could be impaired in  
255 Evolved in comparison with Ancestral. To test this, we constructed transcriptional  
256 fusions between the promoters for the *hag*, *bslA*, and *aprE* genes and the *gfp* gene. *hag*  
257 codes for flagellin, the main component of the flagellum and is required for social  
258 motility; and the expression of *hag* indirectly requires low levels of DegU~P (11, 48).  
259 *bslA* codes for a self-assembling hydrophobin that forms a hydrophobic coat at the

260 surface of biofilms; as shown in strain NC3610, a model for biofilm development, BslA is  
261 required for the formation of structurally complex colonies and biofilms (49–52). Lastly,  
262 *aprE* codes for subtilisin, a major alkaline exoprotease (32, 53). Transcription of both  
263 the *bslA* and *aprE* genes is subject to a logic AND gate, in that it requires both  
264 derepression of both promoters under the control of Spo0A~P and in addition, DegU~P  
265 (11, 32, 49, 54).

266 We then examined the transcription of these genes at the population (biofilms)  
267 and single-cell levels. In Ancestral, the  $P_{aprE^-}$ ,  $P_{bslA^-}$  and  $P_{degU^-gfp}$  fusions were  
268 expressed throughout the architecturally complex colonies, whereas expression of  $P_{hag^-}$   
269 *gfp* was expressed mostly at the colony edge (Fig. 4D). Expression of  $P_{aprE^-}$ ,  $P_{degU^-}$  and  
270  $P_{hag^-gfp}$  was also detected in Lab, but at lower levels, and expression of  $P_{bslA^-gfp}$  was  
271 not detected, consistent with the simpler colony morphology (Fig. 4D). Interestingly, in  
272 spite of the maintenance of a complex colony architecture, expression of  $P_{bslA^-}$ ,  $P_{degU^-}$   
273 and  $P_{hag^-gfp}$  was detected at very low levels in Evolved, and expression of  $P_{aprE^-gfp}$   
274 was not detected (Fig. 4D). Thus, DegU<sup>I186M</sup> reduces the expression of DegU target  
275 genes during biofilm development.

276 During planktonic growth, transcription of *hag* decreases markedly in the  
277 absence of DegU~P (9). Moreover, expression of *hag* is heterogeneous, with free cells  
278 showing higher expression levels than chained cells (55). Accordingly, in Ancestral, the  
279 free cells showed higher fluorescence intensity from the  $P_{hag^-gfp}$  fusion than chained  
280 cells ( $p < 0.0001$ , Kruskal-Wallis test with Dunn's test of multiple comparisons; Fig. 5A  
281 and B). In contrast, Evolved showed a decrease in the GFP signal from  $P_{hag^-gfp}$  both in  
282 free cells (~2.2 fold;  $p < 0.0001$ , Kruskal-Wallis test with Dunn's test of multiple

283 comparisons) and chains (~2.8 fold;  $p < 0.0001$ , Kruskal-Wallis test with Dunn's test of  
284 multiple comparisons), relative to the Ancestral (Fig. 5B). Although Lab does not exhibit  
285 swarming motility, as previously reported (55) it showed increased expression of  $P_{hag}$   
286 *gfp* in both free cells ( $p < 0.0001$ , Kruskal-Wallis test with Dunn's test of multiple  
287 comparisons) and chains ( $p < 0.0001$ , Kruskal-Wallis test with Dunn's test of multiple  
288 comparisons) when compared with Ancestral, which exhibits swarming motility (Fig.  
289 5B). Expression of *bsIA* is heterogeneous between free cells and chains in the  
290 Ancestral, as also found for *hag* (Fig. 5A; see also above), and was ~2.8 fold lower in  
291 free cells when compared to chained cells ( $p < 0.0001$ , Kruskal-Wallis test with Dunn's  
292 test of multiple comparisons; Fig. 5B). Strikingly, no heterogeneous expression between  
293 free cells and chains of *bsIA* was observed in the Evolved clone (Fig. 5B). Moreover, the  
294 level of *bsIA* expression was similar in free cells and chains ( $p = 0.0889$ , Kruskal-Wallis  
295 test with Dunn's test of multiple comparisons), although *bsIA* expression was ~1.5 fold  
296 lower ( $p < 0.0001$ , Kruskal-Wallis test with Dunn's test of multiple comparisons) in the  
297 free cells when compared to Ancestral (Fig. 5B). In the Lab strain, which does not  
298 produce robust biofilms, transcription of *bsIA* is markedly reduced (Fig. 5B). In  
299 laboratory strains, DegU~P is a direct positive regulator of *aprE* and expression of *aprE*  
300 was shown to be bi-stable in a laboratory strain (54). Consistent with this finding, low  
301 and high levels of *aprE* expression were detected for Lab, both in free cells and chains  
302 (Fig. 5). In contrast, Ancestral did not express high levels of *aprE*, although it showed  
303 heterogeneity between free cells and chains in *aprE* expression (Fig. 5). Lastly, Evolved  
304 showed greatly reduced expression of *aprE*, both in free cells ( $p < 0.0001$ , Kruskal-  
305 Wallis test with Dunn's test of multiple comparisons) and chains ( $p < 0.0001$ , Kruskal-

306 Wallis test with Dunn's test of multiple comparisons) (Fig. 5). Thus, domestication in the  
307 natural isolate BSP1 is accompanied by a sharp decrease in the expression of *aprE*.

308 Overall, these results show that in the natural isolate BSP1, the I186M  
309 substitution in DegU reduces the expression of DegU~P regulated genes during biofilm  
310 development and planktonic growth.

### 311 **Domestication impairs a *degU* positive auto-regulatory loop**

312 In its high-level phosphorylated state, DegU~P activates transcription of *degU*  
313 itself (56, 57) by binding to a site in the *degU* regulatory region (34, 58). Importantly, this  
314 positive auto-regulatory loop contributes to the heterogeneous expression of *degU* and  
315 the DegU~P-dependent genes in laboratory strains (54). Since Evolved shows reduced  
316 expression of DegU~P-target genes, we wanted to test whether DegU<sup>I186M</sup> also  
317 impaired expression of *degU*, reducing the levels of DegU. We found expression of  
318  $P_{degU-gfp}$  to be heterogeneous between free cells and chains in Ancestral, with chains  
319 showing a ~1.6 fold higher expression relative to free cells ( $p < 0.0001$ , Kruskal-Wallis  
320 test with Dunn's test of multiple comparisons; Fig. 5) (55). In Evolved and Lab strains,  
321 expression of *degU* was reduced when compared to Ancestral, both in free cells ( $p <$   
322  $0.0001$ , Kruskal-Wallis test with Dunn's test of multiple comparisons) and chains ( $p <$   
323  $0.0001$ , Kruskal-Wallis test with Dunn's test of multiple comparisons) (Fig. 5).

324 Together, these results suggest that I186M impairs the ability of DegU~P to  
325 activate transcription of *degU* itself. Impaired activation of the DegU auto-regulatory  
326 loop, in turn, reduces transcription of *degU* itself, suggesting an explanation to why the  
327 expression of genes directly or indirectly regulated by DegU~P in Evolved is reduced.

328 **Domestication leads to increased survival in the presence of cells of the immune**  
329 **system.**

330 *B. subtilis* has been isolated from the gastrointestinal tract of several animals  
331 including humans (59, 60) and has been found to grow, sporulate and persist in the  
332 murine gut (61, 62). Thus, it can experience selective pressures inside a host. To  
333 determine if domestication could impair the ability of *B. subtilis* to withstand a hostile  
334 host environment, we measured the survival of Evolved and Ancestral in the presence  
335 of cells of the innate immune system - macrophages. Interestingly, the Evolved strain  
336 showed an increased survival over the Ancestral in the presence of macrophages, both  
337 at 3h ( $p = 0.001$ ) and 5h ( $p < 0.0001$ ). (Fig. 6A). This result shows that the  
338 domestication to the laboratory environment coincidentally leads to a survival advantage  
339 for *B. subtilis* when facing cells of the host immune system.

340 **Sporulation efficiency changes across environments.**

341 High levels of DegU~P promote sporulation by increasing the levels of Spo0A~P,  
342 the master regulatory protein for entry into sporulation (13). Since the I186M substitution  
343 reduced transcription of *degU*, we reasoned that changes in the frequency of  
344 sporulation could also have occurred during domestication. We first tested this  
345 phenotype in a host-related environment (RPMI medium) and found the sporulation  
346 efficiency of Ancestral (and of *degU<sup>Anc</sup>*) to be ~1.5 Log<sub>10</sub>-fold higher than that of  
347 Evolved (or *degU<sup>Evo</sup>*) (Fig. 6B). The levels of DegU, as assessed by immunoblot  
348 analysis with an anti-DegU antibody of established specificity (63), are slightly higher in  
349 RPMI for both Ancestral and *degU<sup>Anc</sup>* as compared to Evolved or *degU<sup>Evo</sup>* (Fig. 6C).



350           We also tested the ability of our strains to sporulate in the environment where the  
351 domestication process occurred (LB medium). Most laboratory strains sporulate at very  
352 low levels in LB (about  $10^4$  spores/ml of culture as compared to  $10^8$  spores/ml in a  
353 medium such as DSM that support efficient sporulation) (18). We found no significant  
354 difference in the mean efficiency of sporulation between Evolved (and *degU*<sup>Ev<sub>0</sub></sup>) and  
355 Ancestral (or *degU*<sup>An<sub>0</sub></sup>) in LB (Fig. 6D). Interestingly, the variance was reduced in the  
356 Evolved when compared with the Ancestral (F-test,  $p = 0.0002$ ). In addition, all of the  
357 laboratory strains tested sporulated in LB at efficiencies lower than that of the Ancestral,  
358 although one strain, JH642, sporulated better than the other laboratory strains tested  
359 under these conditions (Fig. 6D). This is consistent with the initial description of  
360 Ancestral, which enters sporulation during growth and reaches a higher titer of spores  
361 than any of the laboratory strains tested in DSM (18). The steady-state levels of DegU  
362 in whole-cell lysates obtained 1 hour after the onset of stationary phase in LB revealed  
363 very similar levels of DegU for all the strains (Fig. 6E).

364           These results suggest that the I186M mutation can affect the intracellular levels  
365 of DegU in a manner that depends on the environment and show that the influence of  
366 DegU on sporulation exhibits antagonistic pleiotropy.

367

## 368 Discussion

369 BSP1 is a gastro-intestinal isolate of *B. subtilis* in which sporulation initiates  
370 during growth. This happens because BSP1 lacks three *rap* genes, coding for  
371 phosphatases that normally drain phosphoryl groups from the phosphorelay, thus  
372 negatively regulating the activation of Spo0A. As such, more cells in the population  
373 have Spo0A active above a threshold level required to induce sporulation. Several other  
374 gastro-intestinal isolates of *B. subtilis*, including from the human gut, also lack  
375 combinations of the *rap* genes and show enhanced sporulation (18, 62). *B. subtilis*  
376 completes its entire life cycle in the gut (62), and it seems likely that sporulation is  
377 important for survival and/or propagation in the gut ecosystem, as shown for other  
378 spore-formers (64, 65). Sporulation is also important for the efficient dispersal of spore-  
379 formers through the environment and among hosts (66–68). Sporulation is, however, a  
380 time and energetically costly process, requiring the differential expression of over 10%  
381 of the genome over a period of 7-8 hours (18, 69). Accordingly, the propagation of *B.*  
382 *subtilis* in the laboratory in the absence of selection for sporulation results in a reduction  
383 in the ability to sporulate (19–22). *B. subtilis* has been used in laboratory conditions for  
384 more than fifty years, and has accumulated mutations likely to be adaptive in that  
385 environment and that, relative to wild strains, lead to the attenuation of phenotypic traits  
386 that include swarming motility (41, 42), poly- $\gamma$ -glutamate synthesis (8), production of  
387 antibiotics, the secretion of degradative enzymes (70) or the formation of robust biofilms  
388 (6, 8, 71). These processes have either become neutral with respect to fitness, or  
389 selection favored its loss under laboratory conditions. In addition, repeatedly selecting

390 individual colonies to cultivate and maintain bacteria in laboratory conditions can  
391 increase the chances of loss of phenotypes independently of fitness differences (72).

392 Here we traced one example of possible domestication routes of the natural  
393 isolate *B. subtilis* strain BSP1. Rapid changes in colony morphotypes were observed in  
394 parallel cultures, leading to complete fixation of a specific colonial morphotype, termed  
395 type *b*, in all the replicate cultures after two weeks (Fig. 1). The adaptive morphotype is  
396 characterized by a smooth and flat colony, lacking the complex architectural features of  
397 the original strain (Fig. 2C). Similar colony morphology changes were previously  
398 observed during domestication of other *B. subtilis* strains (3, 19–21, 24). Colonies are  
399 biofilms formed at the solid/air interface (1). As such, these observations hinted at  
400 attenuation of an important social behavior. Studies in *Salmonella enterica*,  
401 *Saccharomyces cerevisiae*, *Bacillus licheniformis*, *Aneurinibacillus migulanus*, and  
402 *Myxococcus xanthus* have also documented the appearance of smooth colonies within  
403 a short period of time (5, 73–76). This suggests that phenotypic parallelism across  
404 species is a broad pattern of adaptation to the laboratory environment.

405 At the genomic level we detected mutations in the coding region of the *degU*  
406 gene (Fig. 2). DegU is the response regulator of the two-component system DegS-  
407 DegU and controls social traits such as biofilm formation, swarming motility and  
408 exoprotease secretion (11). In its non-phosphorylated state, DegU is responsible for the  
409 development of competence while the rise in DegU~P levels sequentially activates  
410 swarming, biofilm formation and exoprotease secretion (9). DegU belongs to the  
411 NarL/FixJ subfamily of DNA binding proteins (77). We characterized in detail the effects  
412 of a mutation leading to the I186M substitution in DegU. The I186M substitution occurs

413 in the DNA-recognition helix of the DegU HTH motif, located in the C-terminal domain of  
414 the protein (Fig. 2A). Modeling studies indicate that this substitution is likely to affect a  
415 contact of the HTH motif with bases in the major groove of DNA as also shown in the  
416 crystal structure of NarL, in which I186 is conserved, with DNA (78) (Fig. 2 and Fig. S2;  
417 see also Text S1). Moreover, alanine-scanning mutagenesis showed decreased  
418 transcription of the DegU-controlled genes *comG* (as a proxy for the activity of ComK, a  
419 direct target of DegU) and *aprE* in a strain producing DegU<sup>I186A</sup>, and the substitution  
420 also affected the binding of DegU to the *comK* and *aprE* target promoters (32). I186 is  
421 also conserved in LuxR, another NarL family member, and its replacement by Ala also  
422 resulted in reduced binding to target DNA sequences (79). One other substitution found  
423 in DegU in our study, H200Y, is also likely to impair DNA binding, as suggested by the  
424 study of a single Ala substitution in transcription and DNA binding to cognate sites in the  
425 promoters of the DegU-responsive genes *comK* and *aprE* (32). This residue, however,  
426 as suggested by the structure of a NarL-DNA co-crystal, contacts the DNA phosphate  
427 backbone (78) (see also S1 Text). Importantly, while the I186M substitution found in the  
428 domesticated clone, Evolved, did not cause changes in the efficiency of transformation  
429 with exogenous DNA, it impaired processes regulated by DegU~P as swarming motility,  
430 biofilm formation, SPP1 bacteriophage sensitivity, and exoprotease secretion. In  
431 agreement with these observations, transcription of genes regulated by DegU~P was  
432 reduced in the domesticated clone. The transcription of *degU* itself was also reduced  
433 (Fig. 5B); since our *degU* transcriptional reporter fusion includes all promoters known to  
434 contribute to the expression of the gene (Fig. S3), including the DegU~P-recognized P3  
435 promoter, it suggests that the I186M substitution affects the auto-regulatory loop that

436 controls the production and activity of DegU (57). Failure to successfully activate the  
437 auto-regulatory loop due to the likely impaired binding to DNA of the I186M substitution  
438 could be an explanation for the impaired biofilm development, exoprotease production  
439 and phage sensitivity, which require high levels of DegU~P.

440       The extensive propagation of *B. subtilis* in a nutrient-rich medium, *i.e.*, under  
441 conditions of relaxed selection for sporulation, resulted in the emergence of a strain that  
442 accumulated mutations in genes of biosynthetic pathways, sporulation competence,  
443 DNA repair and others (20, 21). Relative to the ancestral, the resulting strain showed  
444 different cell and colony morphologies, loss of sporulation and competence, but an  
445 overall increased fitness under laboratory conditions (20, 21). Interestingly, our  
446 selection, which was also performed in a rich medium, LB, did not result in loss of  
447 sporulation. Rather, the I186M substitution modulated the efficiency of sporulation  
448 across conditions, specifically, in a host-related condition (RPMI medium) and in LB  
449 (Fig. 6). Importantly, the accumulation of DegU was only slightly higher in Ancestral  
450 (and *degU*<sup>Ano</sup>) relative to Evolved when sporulation was tested in RPMI, where the  
451 sporulation efficiency of Ancestral (and *degU*<sup>Ano</sup>) was also higher than that of Evolved.  
452 Since high levels of DegU~P control production of Spo0A~P (13), it is possible that  
453 I186M places DegU~P below a threshold required for the stimulation of sporulation  
454 through Spo0A. This is consistent with decreased transcription of *degU* by DegU<sup>I186M</sup>  
455 (Fig. 5B). In contrast, no differences in the mean sporulation efficiency of Evolved and  
456 Ancestral were found under nutritional conditions (LB medium) that do not support  
457 efficient sporulation by most laboratory strains (Fig. 6), and the accumulation of DegU  
458 did not differ between Evolved and Ancestral. We note, however, that the

459 accumulation of DegU reflects both transcription/production of the protein and  
460 proteolysis; since DegU~P is a preferred substrate for the ClpXP protease, the steady-  
461 state levels of the protein will reflect the ratio of DegU/DegU~P levels (57). The inability  
462 of some domesticated strains of *B. subtilis* to form robust biofilms results from the  
463 accumulation of mutations in four chromosomal genes (*sfp*, *epsC*, *swrA*, and *degQ*), in  
464 addition to the loss of plasmid-born gene, *rapP* (6). In contrast, under our experimental  
465 conditions and using a natural isolate of *B. subtilis*, the target for mutation during  
466 domestication is *degU*. Our results are consistent with what was observed in the  
467 laboratory strain 168, that has a mutation in *degQ* (6), targeting the DegS-DegU system.  
468 Taking into account that targeting the DegS-DegU system is a strategy used by two  
469 different strains of *B. subtilis*, with very different genomes, suggests that this system is a  
470 major target of adaptation to the laboratory environment.

471 It seems possible that our experimental conditions did not cause relaxed  
472 selection for sporulation; rather, our selection may have first targeted the most costly  
473 phenotypes under the test conditions, those directly controlled by DegU~P, including  
474 the formation of complex colonies and robust biofilms, at least in the context of the  
475 BSP1 genome. It is interestingly to note that a two-month culture of the Laboratory  
476 strain NCIB 3610, resulted in the emergence of strains with different levels of biofilm  
477 robustness, as shown by the colony architecture and the expression of genes required  
478 for matrix production (3). These phenotypes were the result of mutations in the *sinR*  
479 gene, coding for a master regulator of biofilm development, and arose both on plates as  
480 well as in LB cultures (3). One conclusion offered was that matrix overproduction can be  
481 neutral or advantageous in a rich medium (3). The difference in the mutations obtained

482 under our experimental conditions and the study of Leiman and co-workers is in line  
483 with the idea that adaptations to a new environment, depend both on the initial genome  
484 as well as the culture history of the strain (80).

485 Taken together, the results suggest that the I186M mutation impairs the ability of  
486 DegU to function as a transcription factor and that this feature confers an advantage to  
487 the natural isolate BSP1 when growing under laboratory conditions. Interestingly, *arcA*  
488 in *E. coli* and *rpoS* in *S. enterica* and *E. coli*, regulators of stationary phase processes,  
489 are also common targets of laboratory adaptation (73, 81). This strengthens the  
490 evidence for a general rule that the initial adaptations to a new environment involve  
491 changes in genes that act as regulatory hubs of networks that affect the stationary  
492 phase of growth.

493 The accumulation of mutations during adaptation to a laboratory environment  
494 over a relatively small number of passages also unraveled a signal of antagonistic  
495 pleiotropy: Evolved exhibited changes in traits in host-related environments, and  
496 interestingly, it showed increased survival in the presence of macrophages (Fig. 6A).  
497 This provides support for the coincidental hypothesis (82, 83) that posits that  
498 adaptations to new environments can lead to changes in complex interactions with  
499 hosts. Increased survival of the Evolved when facing the cells of the host immune  
500 system also implicates DegU potential relevance for the interaction between *B. subtilis*  
501 and its host in its natural environment. Importantly, the genus *Bacillus* is commonly  
502 used as a probiotic (84, 85) and *B. subtilis* was shown to stimulate macrophage activity  
503 and the host immune response (86–89). However, the mechanisms behind *Bacillus* role  
504 as a probiotic are still unclear (84). Given that DegU is widely conserved amongst the

505 *Bacillus* genus (Fig. S2), the role of DegU in this interaction should be studied in future  
506 work. In addition, our study highlights the importance of performing short-term  
507 cultivation of bacterial natural isolates to prevent the loss of traits that may be important  
508 for the probiotic activity of *B. subtilis*.



## 509 **Material and Methods**

510 **General methods.** Lysogeny Broth (LB) medium was used for the routine growth of *B.*  
511 *subtilis* and *Escherichia coli*. The *E. coli* strain DH5 $\alpha$  was used as the host strain for the  
512 construction and maintenance of plasmids and was grown in the presence of 100  $\mu\text{g ml}^{-1}$   
513 <sup>1</sup> ampicillin when carrying vectors or recombinant plasmids. When appropriate, *B.*  
514 *subtilis* strains were grown in the presence antibiotics, used at the following  
515 concentrations: 5  $\mu\text{g ml}^{-1}$  chloramphenicol, 1  $\mu\text{g ml}^{-1}$  erythromycin, 1  $\mu\text{g ml}^{-1}$  neomycin  
516 for liquid cultures and 3  $\mu\text{g ml}^{-1}$  neomycin on solid media.

517 **Other Methods.** The construction of all plasmids and strains is described in detail in the  
518 Supplemental Material. The *B. subtilis* strains used or constructed in this work are listed  
519 in Table S1. Plasmids are listed in Table S2 and oligonucleotides in Table S3. Modeling  
520 of the DegU structure is also described in Text S1.

521 **Domestication experiments.** Five independent populations, all derived from the  
522 ancestral natural isolate BSP1 (60), were grown for 16 days in LB with a 1:100 dilution  
523 into fresh medium every 24 h. This is a common media for growing *B. subtilis* in the  
524 laboratory environment and may introduce selective pressure against sporulation and  
525 biofilm formation. At the point of dilution, an aliquot from each culture was collected and  
526 kept frozen at -80°C for subsequent analysis.

527 **Whole-genome sequencing.** To identify the mutations that emerged after 8 days of  
528 evolution we extracted DNA from the Evolved clone from population 1 and from the  
529 Ancestral. The DNA library construction and sequencing were carried out by the IGC  
530 genomics facility. Each sample was pair-end sequenced on an Illumina MiSeq Benchtop

531 Sequencer. Standard procedures produced data sets of Illumina paired-end 250-bp  
532 read pairs. The mean coverage per sample was of 30 and 18, for the Evolved and  
533 Ancestral respectively. Mutations were identified using the BRESEQ pipeline version  
534 0.32.1 (90) with default parameters and using the available BSP1 genome (91) as a  
535 reference genome. All predicted mutations were manually inspected using IGV (92).

536 **Macrophages culture and infection assay.** The murine macrophage cell line RAW  
537 264.7 was cultured in RPMI medium (Sigma), supplemented with 2 mM L-glutamine, 1  
538 mM sodium pyruvate, 10 mM hepes, 50  $\mu$ M 2-mercaptoethanol solution and 10 % heat-  
539 inactivated Fetal Bovine Serum in an atmosphere of 5 % CO<sub>2</sub>. For the infection, *B.*  
540 *subtilis* and the macrophages were grown separately in a 24-well tissue plate containing  
541 fresh RPMI media as described above. At 24h of acclimatization, *B. subtilis* was diluted  
542 1:100 into fresh RPMI. Macrophages were washed, re-suspended in fresh RPMI and  
543 activated with 2  $\mu$ g ml<sup>-1</sup> CpG for another 24h (93). Then, the macrophages were  
544 washed to remove the remaining CpG, fresh RPMI media was added and *B. subtilis*  
545 added to a 1:8 MOI (multiplicity of infection; about 8 x 10<sup>6</sup> cells). At the indicated time  
546 points of infection, the wells were scrapped and the contents centrifuged at 6000 g for  
547 10 minutes at room temperature. After centrifugation, the samples were serially diluted  
548 and plated to determine the titer of total, viable, cells and heat-resistant spores.

549 **Sporulation assays.** Sporulation of *B. subtilis* was usually analyzed in LB and in  
550 supplemented RPMI. When using LB, *B. subtilis* cultures were grown overnight, diluted  
551 1:100 and incubated for 24 h at 37 °C. At this time, dilutions of the cultures were plated  
552 for total viable counts and treated for 20 min at 80°C to determine the titer of heat-  
553 resistant spores. For supplemented RPMI, the cultures were grown as described above

554 for 48h and plated for viable cells and spore counts as described above for LB. The  
555 sporulation efficiency was defined as the ratio of heat-resistant spores relative to the  
556 total viable cell count (18).

557 **SPP1 phage lysates and transduction.** SPP1 lysates were prepared as described by  
558 Yasbin and Young (94). Briefly, a dense culture of *B. subtilis* was infected with different  
559 dilutions of SPP1 in a semisolid LB agar (LB containing 0.7% agar). The plate  
560 containing near confluent phage plaques was washed with 4 ml of TBT, centrifuged at  
561 5000 g for 10 min, treated with 12  $\mu\text{g ml}^{-1}$  DNase and filtered through a 0.45  $\mu\text{m}$  syringe  
562 filter. The indicator strain PY79 was used for titration of the SPP1 lysates as described  
563 by São-José et al (95). SPP1 phage transduction was performed as described (42). The  
564 recipient strains were grown in LB until stationary phase after which 1 ml of the culture  
565 of the recipient strain was mixed in a glass tube with 10 mM  $\text{CaCl}_2$  and infected with an  
566 MOI of 1 of the donor SPP1 lysate. The transduction mixture was then incubated at 37  
567  $^{\circ}\text{C}$  for 25 min with agitation, centrifuged at 5000 g for 10 min, washed with 2 ml of LB,  
568 and centrifuged again at 5000 g for 10 min. The supernatant was discarded, the pellet  
569 was resuspended in 100  $\mu\text{l}$  of LB and plated onto LB plates fortified with 1.5 % agar with  
570 the appropriate antibiotics and 10 mM of sodium citrate.

571 **Competence assay.** Development of competence was performed as described by  
572 Baptista et al (47). Briefly, *B. subtilis* cultures were grown overnight and diluted 1:100 in  
573 GM1 at 37  $^{\circ}\text{C}$ . Ninety minutes after the end of the exponential growth, the cultures were  
574 diluted 1:10 in GM2 and incubated for 90 minutes at 37  $^{\circ}\text{C}$ . At this point, a sample of the  
575 cultures was serially diluted in LB and plated for determination of total colony forming  
576 units (CFU) per milliliter. For transformation, DNA from strain AH7605 or W648 was

577 added to 500  $\mu\text{l}$  of the culture samples, to a concentration of  $5 \mu\text{g ml}^{-1}$ , the mixture  
578 incubated for 30 min at 37 °C and finally plated with the appropriate antibiotics. The  
579 transformation efficiency is the ratio between the number of transformants and the total  
580 number of colonies.

581 **Protease activity assay.** Secreted proteases were observed essentially as described  
582 by Saran et al (96). The strains were grown until they reached an absorbance of 0.8 at  
583 600 nm. At this time the cultures were diluted to an absorbance of 0.01 at 600 nm. 10  $\mu\text{l}$   
584 of this dilution was spotted in a 2 % skimmed milk plate and incubated at 37 °C for 48 h.  
585 Then, 6 ml of 10 % Tannic Acid was added for detection of the protease-positive strains.  
586 The diameter of the halos observed was measured, and the diameter of the colony was  
587 subtracted in order to obtain the real value of the halo.

588 **Swarming and colony morphology assays.** Swarming motility was examined  
589 according to the method described by Kearns and Losick (42). For colony morphology,  
590 the *B. subtilis* cultures were grown overnight and 3  $\mu\text{l}$  of the culture was spotted onto an  
591 MSgg (97) plate fortified with 1.5 % agar. The plates were incubated at 28 °C or 37 °C.  
592 The images were captured at the times indicated in the figures.

593 **Biofilm quantification by crystal violet.** The method used for estimating the solid-  
594 surface-associated biofilm formation with crystal violet was as described by Morikawa et  
595 al (98). Briefly, an overnight culture was diluted to an absorbance of 0.03 at 600 nm and  
596 mixed 1:100 into 100  $\mu\text{l}$  of MSgg in a 96-well plastic titer plate. The plate was incubated  
597 for 48 h at 25 °C. Then, the culture was carefully removed from the wells. After washing  
598 two times with distilled water, 150  $\mu\text{l}$  of 1 % crystal violet was added to the wells and  
599 incubated for 25 min at room temperature. The wells were washed again two times with

600 distilled water and the crystal violet attached to the biofilm matrix was solubilized in 150  
601  $\mu$ l of DMSO and incubated for 10 minutes at room temperature. The removed culture  
602 was quantified by measuring its absorbance at 600 nm and the biofilm attached to the  
603 crystal violet was quantified measuring its absorbance at 570 nm.

604 **Biofilm fluorescence imaging.** For biofilm imaging, the *B. subtilis* cultures were grown  
605 overnight and 3  $\mu$ l of the culture was spotted onto an MSgg plate fortified with 1.5 %  
606 agar and incubated for 96h at 28°C. Images were acquired on a Zeiss Axio Zoom.V16  
607 stereomicroscope equipped with a Zeiss Axiocam 503 mono CCD camera and  
608 controlled with the Zeiss Zen 2.1 (blue edition) software, using the 1x 0.25 NA objective,  
609 the fluorescence filter set GFP and the Bright Field optics.

610 **Fluorescence microscopy and image analysis.** Cultures were grown in LB until one  
611 hour after the end of the exponential phase. The cells were collected by centrifugation  
612 (1 min at 2.400 x g, room temperature), and washed with 1 ml of phosphate-buffered  
613 saline (PBS). Finally, the cells were resuspended in 100  $\mu$ l of PBS and applied to  
614 microscopy slides coated with a film of 1.7% agarose. Images were taken with standard  
615 phase contrast and GFP filter, using a Leica DM 6000B microscope equipped with an  
616 aniXon+EM camera (Andor Technologies) and driven by Metamorph software (Meta  
617 Imaging series 7.7, Molecular Devices). For quantification of the GFP signal, 6x6 pixel  
618 regions were defined in the desired cell and the average pixel intensity was calculated  
619 and corrected by subtracting the average pixel intensity of the background, using  
620 Metamorph software (Meta Imaging series 7.7, Molecular Devices).

621 **Immunoblot analysis.** Immunoblot of DegU was analyzed in LB and in supplemented  
622 RPMI. When using LB, *B. subtilis* cultures were grown until one hour after the end of the

623 exponential phase and samples (10 ml) were withdrawn. For supplemented RPMI, the  
624 cultures were grown as described above and samples (10 ml) were withdrawn. In both  
625 media, the cells were collected by centrifugation (5 min at 15300 x g, 4° C). The cells  
626 were resuspended in 1ml Lysis buffer (50 mM NaH<sub>2</sub>PO<sub>4</sub>, 0.5 M NaCl, 10 mM Imidazole,  
627 pH 8.0) and whole-cell lysates prepared using a French press cell (19,000 lb/in<sup>2</sup>).  
628 Proteins in the lysates (10 µg) were then separated on 15% SDS-PAGE gels and the  
629 gels subject to immunoblot analysis using an anti-DegU antibody of established  
630 specificity at a 1:1000 dilution (99). Gels run in parallel were stained with Coomassie  
631 brilliant blue to be used as loading controls.

632 **Data availability.** Genome sequencing data have been deposited with links to  
633 BioProject accession number PRJNA592868 in the NCBI BioProject database  
634 (<https://www.ncbi.nlm.nih.gov/bioproject/>).

## 635 **Acknowledgments**

636 We thank Dr. Mitsuo Ogura for the gift of the anti-DegU antibody, Dr. Kazuo  
637 Kobayashi for the gift of strains WTF28 and W648, Dr. Jan-Willem Veening for the gift  
638 of strains 08G52, 08G57, and 08I09, and Dr. Carlos São José for the gift of the SPP1  
639 lysate and advice on its use. We thank Tanja Đapa for critically reading this manuscript.  
640 We also thank Mónica Serrano for helpful discussions.

641 This work was supported by Project LISBOA-01-0145-FEDER-007660  
642 (“Microbiologia Molecular, Estrutural e Celular”) funded by FEDER funds through  
643 COMPETE2020 –“Programa Operacional Competitividade e Internacionalização”  
644 (POCI), by national funds through the FCT (“Fundação para a Ciência e a Tecnologia”)  
645 grant POCI/BIABCM/60855/2004 to A.O.H. and partially supported by PPBI -  
646 Portuguese Platform of BioImaging (PPBI-POCI-01-0145-FEDER-022122) co-funded by  
647 national funds from OE - "Orçamento de Estado" and by European funds from FEDER.  
648 The research leading to these results also received funding from the European  
649 Research Council under the European Community’s Seventh Framework Programme  
650 (FP7/2007–2013)/ERC grant agreement no 260421 – ECOADAPT to I.G. H.C.B. was  
651 the recipient of a doctoral fellowship from the FCT (PD/BD/128429/2017). The funders  
652 had no role in study design, data collection and analysis, decision to publish, or  
653 preparation of the manuscript.

## 654 **References**

- 655 1. Vlamakis H, Chai Y, Beaugregard P, Losick R, Kolter R. 2013. Sticking together:  
656 building a biofilm the *Bacillus subtilis* way. *Nat Rev Microbiol* 11:157–168.
- 657 2. Eydallin G, Ryall B, Maharjan R, Ferenci T. 2014. The nature of laboratory  
658 domestication changes in freshly isolated *Escherichia coli* strains. *Environ*  
659 *Microbiol* 16:813–828.
- 660 3. Leiman SA, Arboleda LC, Spina JS, McLoon AL. 2014. SinR is a mutational target  
661 for fine-tuning biofilm formation in laboratory-evolved strains of *Bacillus subtilis*.  
662 *BMC Microbiol* 14:301.
- 663 4. Marks ME, Castro-Rojas CM, Teiling C, Du L, Kapatral V, Walunas TL, Crosson S.  
664 2010. The genetic basis of laboratory adaptation in *Caulobacter crescentus*. *J*  
665 *Bacteriol* 192:3678–3688.
- 666 5. Kuthan M, Devaux F, Janderová B, Slaninová I, Jacq C, Palková Z. 2003.  
667 Domestication of wild *Saccharomyces cerevisiae* is accompanied by changes in  
668 gene expression and colony morphology. *Mol Microbiol* 47:745–754.
- 669 6. McLoon AL, Guttenplan SB, Kearns DB, Kolter R, Losick R. 2011. Tracing the  
670 domestication of a biofilm-forming bacterium. *J Bacteriol* 193:2027–2034.
- 671 7. Gallegos-Monterrosa R, Mhatre E, Kovács ÁT. 2016. Specific *Bacillus subtilis* 168  
672 variants form biofilms on nutrient-rich medium. *Microbiology (Reading, Engl)*  
673 162:1922–1932.



- 674 8. Stanley NR, Lazazzera BA. 2005. Defining the genetic differences between wild  
675 and domestic strains of *Bacillus subtilis* that affect poly-gamma-dl-glutamic acid  
676 production and biofilm formation. *Mol Microbiol* 57:1143–1158.
- 677 9. Kobayashi K. 2007. Gradual activation of the response regulator DegU controls  
678 serial expression of genes for flagellum formation and biofilm formation in *Bacillus*  
679 *subtilis*. *Mol Microbiol* 66:395–409.
- 680 10. Miras M, Dubnau D. 2016. A DegU-P and DegQ-Dependent Regulatory Pathway  
681 for the K-state in *Bacillus subtilis*. *Front Microbiol* 7:1868.
- 682 11. Verhamme DT, Kiley TB, Stanley-Wall NR. 2007. DegU co-ordinates multicellular  
683 behaviour exhibited by *Bacillus subtilis*. *Mol Microbiol* 65:554–568.
- 684 12. Murray EJ, Kiley TB, Stanley-Wall NR. 2009. A pivotal role for the response  
685 regulator DegU in controlling multicellular behaviour. *Microbiology (Reading, Engl)*  
686 155:1–8.
- 687 13. Marlow VL, Porter M, Hopley L, Kiley TB, Swedlow JR, Davidson FA, Stanley-Wall  
688 NR. 2014. Phosphorylated DegU manipulates cell fate differentiation in the *Bacillus*  
689 *subtilis* biofilm. *J Bacteriol* 196:16–27.
- 690 14. Pollak S, Omer Bendori S, Eldar A. 2015. A complex path for domestication of *B.*  
691 *subtilis* sociality. *Curr Genet* 61:493–496.
- 692 15. Omer Bendori S, Pollak S, Hizi D, Eldar A. 2015. The RapP-PhrP quorum-sensing  
693 system of *Bacillus subtilis* strain NCIB3610 affects biofilm formation through

- 694 multiple targets, due to an atypical signal-insensitive allele of RapP. *J Bacteriol*  
695 197:592–602.
- 696 16. Leiman SA, May JM, Lebar MD, Kahne D, Kolter R, Losick R. 2013. D-amino acids  
697 indirectly inhibit biofilm formation in *Bacillus subtilis* by interfering with protein  
698 synthesis. *J Bacteriol* 195:5391–5395.
- 699 17. Narula J, Kuchina A, Zhang F, Fujita M, Süel GM, Igoshin OA. 2016. Slowdown of  
700 growth controls cellular differentiation. *Mol Syst Biol* 12:871.
- 701 18. Serra CR, Earl AM, Barbosa TM, Kolter R, Henriques AO. 2014. Sporulation during  
702 growth in a gut isolate of *Bacillus subtilis*. *J Bacteriol* 196:4184–4196.
- 703 19. Zeigler DR, Nicholson WL. 2017. Experimental evolution of *Bacillus subtilis*.  
704 *Environ Microbiol* 19:3415–3422.
- 705 20. Maughan H, Nicholson WL. 2011. Increased fitness and alteration of metabolic  
706 pathways during *Bacillus subtilis* evolution in the laboratory. *Appl Environ Microbiol*  
707 77:4105–4118.
- 708 21. Brown CT, Fishwick LK, Chokshi BM, Cuff MA, Jackson JM, Oglesby T, Rioux AT,  
709 Rodriguez E, Stupp GS, Trupp AH, Woolcombe-Clarke JS, Wright TN, Zaragoza  
710 WJ, Drew JC, Triplett EW, Nicholson WL. 2011. Whole-genome sequencing and  
711 phenotypic analysis of *Bacillus subtilis* mutants following evolution under conditions  
712 of relaxed selection for sporulation. *Appl Environ Microbiol* 77:6867–6877.

- 713 22. Maughan H, Masel J, Birky CW, Nicholson WL. 2007. The roles of mutation  
714 accumulation and selection in loss of sporulation in experimental populations of  
715 *Bacillus subtilis*. *Genetics* 177:937–948.
- 716 23. Jerison ER, Desai MM. 2015. Genomic investigations of evolutionary dynamics and  
717 epistasis in microbial evolution experiments. *Curr Opin Genet Dev* 35:33–39.
- 718 24. Kovács ÁT, Dragoš A. 2019. Evolved Biofilm: Review on the Experimental  
719 Evolution Studies of *Bacillus subtilis* Pellicles. *J Mol Biol*.
- 720 25. Weinreich DM, Delaney NF, Depristo MA, Hartl DL. 2006. Darwinian evolution can  
721 follow only very few mutational paths to fitter proteins. *Science* 312:111–114.
- 722 26. Barrick JE, Lenski RE. 2009. Genome-wide mutational diversity in an evolving  
723 population of *Escherichia coli*. *Cold Spring Harb Symp Quant Biol* 74:119–129.
- 724 27. Tenaille O, Rodríguez-Verdugo A, Gaut RL, McDonald P, Bennett AF, Long AD,  
725 Gaut BS. 2012. The molecular diversity of adaptive convergence. *Science*  
726 335:457–461.
- 727 28. Herron MD, Rashidi A, Shelton DE, Driscoll WW. 2013. Cellular differentiation and  
728 individuality in the “minor” multicellular taxa. *Biol Rev Camb Philos Soc* 88:844–  
729 861.
- 730 29. Waters SM, Zeigler DR, Nicholson WL. 2015. Experimental evolution of enhanced  
731 growth by *Bacillus subtilis* at low atmospheric pressure: genomic changes revealed  
732 by whole-genome sequencing. *Appl Environ Microbiol* 81:7525–7532.

- 733 30. Lopez D, Vlamakis H, Kolter R. 2009. Generation of multiple cell types in *Bacillus*  
734 *subtilis*. *FEMS Microbiol Rev* 33:152–163.
- 735 31. Tarnita CE. 2017. The ecology and evolution of social behavior in microbes. *J Exp*  
736 *Biol* 220:18–24.
- 737 32. Shimane K, Ogura M. 2004. Mutational analysis of the helix-turn-helix region of  
738 *Bacillus subtilis* response regulator DegU, and identification of cis-acting  
739 sequences for DegU in the *aprE* and *comK* promoters. *J Biochem* 136:387–397.
- 740 33. Ogura M, Tanaka T. 1996. *Bacillus subtilis* DegU acts as a positive regulator for  
741 *comK* expression. *FEBS Lett* 397:173–176.
- 742 34. Msadek T, Kunst F, Henner D, Klier A, Rapoport G, Dedonder R. 1990. Signal  
743 transduction pathway controlling synthesis of a class of degradative enzymes in  
744 *Bacillus subtilis*: expression of the regulatory genes and analysis of mutations in  
745 *degS* and *degU*. *J Bacteriol* 172:824–834.
- 746 35. Hahn J, Kong L, Dubnau D. 1994. The regulation of competence transcription  
747 factor synthesis constitutes a critical control point in the regulation of competence  
748 in *Bacillus subtilis*. *J Bacteriol* 176:5753–5761.
- 749 36. Kunst F, Msadek T, Bignon J, Rapoport G. 1994. The DegS/DegU and  
750 ComP/ComA two-component systems are part of a network controlling degradative  
751 enzyme synthesis and competence in *Bacillus subtilis*. *Res Microbiol* 145:393–402.

- 752 37. Hamoen LW, Van Werkhoven AF, Venema G, Dubnau D. 2000. The pleiotropic  
753 response regulator DegU functions as a priming protein in competence  
754 development in *Bacillus subtilis*. *Proc Natl Acad Sci USA* 97:9246–9251.
- 755 38. Lovett CM, Dubnau D. 2002. Transformation and Recombination, p. 453–471. *In*  
756 Sonenshein, AL, Hoch, JA, Losick, R (eds.), *Bacillus subtilis and Its Closest*  
757 *Relatives*. American Society of Microbiology.
- 758 39. Ogura M, Yamaguchi H, Yoshida Ki null, Fujita Y, Tanaka T. 2001. DNA  
759 microarray analysis of *Bacillus subtilis* DegU, ComA and PhoP regulons: an  
760 approach to comprehensive analysis of *B.subtilis* two-component regulatory  
761 systems. *Nucleic Acids Res* 29:3804–3813.
- 762 40. Amati G, Bisicchia P, Galizzi A. 2004. DegU-P represses expression of the motility  
763 *fla-che* operon in *Bacillus subtilis*. *J Bacteriol* 186:6003–6014.
- 764 41. Patrick JE, Kearns DB. 2009. Laboratory strains of *Bacillus subtilis* do not exhibit  
765 swarming motility. *J Bacteriol* 191:7129–7133.
- 766 42. Kearns DB, Losick R. 2003. Swarming motility in undomesticated *Bacillus subtilis*.  
767 *Mol Microbiol* 49:581–590.
- 768 43. Kearns DB, Chu F, Rudner R, Losick R. 2004. Genes governing swarming in  
769 *Bacillus subtilis* and evidence for a phase variation mechanism controlling surface  
770 motility. *Mol Microbiol* 52:357–369.

- 771 44. Branda SS, González-Pastor JE, Ben-Yehuda S, Losick R, Kolter R. 2001. Fruiting  
772 body formation by *Bacillus subtilis*. *Proc Natl Acad Sci USA* 98:11621–11626.
- 773 45. Hamon MA, Lazazzera BA. 2001. The sporulation transcription factor Spo0A is  
774 required for biofilm development in *Bacillus subtilis*. *Mol Microbiol* 42:1199–1209.
- 775 46. Dahl MK, Msadek T, Kunst F, Rapoport G. 1992. The phosphorylation state of the  
776 DegU response regulator acts as a molecular switch allowing either degradative  
777 enzyme synthesis or expression of genetic competence in *Bacillus subtilis*. *J Biol*  
778 *Chem* 267:14509–14514.
- 779 47. Baptista C, Barreto HC, São-José C. 2013. High levels of DegU-P activate an Esat-  
780 6-like secretion system in *Bacillus subtilis*. *PLoS ONE* 8:e67840.
- 781 48. Tsukahara K, Ogura M. 2008. Promoter selectivity of the *Bacillus subtilis* response  
782 regulator DegU, a positive regulator of the *fla/che* operon and *sacB*. *BMC Microbiol*  
783 8:8.
- 784 49. Verhamme DT, Murray EJ, Stanley-Wall NR. 2009. DegU and Spo0A jointly control  
785 transcription of two loci required for complex colony development by *Bacillus*  
786 *subtilis*. *J Bacteriol* 191:100–108.
- 787 50. Kovács AT, Kuipers OP. 2011. Rok regulates *yuaB* expression during  
788 architecturally complex colony development of *Bacillus subtilis* 168. *J Bacteriol*  
789 193:998–1002.

- 790 51. Kobayashi K, Iwano M. 2012. BslA(YuaB) forms a hydrophobic layer on the surface  
791 of *Bacillus subtilis* biofilms. *Mol Microbiol* 85:51–66.
- 792 52. Hogley L, Ostrowski A, Rao FV, Bromley KM, Porter M, Prescott AR, MacPhee CE,  
793 van Aalten DMF, Stanley-Wall NR. 2013. BslA is a self-assembling bacterial  
794 hydrophobin that coats the *Bacillus subtilis* biofilm. *Proc Natl Acad Sci USA*  
795 110:13600–13605.
- 796 53. Marvasi M, Visscher PT, Casillas Martinez L. 2010. Exopolymeric substances  
797 (EPS) from *Bacillus subtilis*: polymers and genes encoding their synthesis. *FEMS*  
798 *Microbiol Lett* 313:1–9.
- 799 54. Veening J-W, Igoshin OA, Eijlander RT, Nijland R, Hamoen LW, Kuipers OP. 2008.  
800 Transient heterogeneity in extracellular protease production by *Bacillus subtilis*.  
801 *Mol Syst Biol* 4:184.
- 802 55. Kearns DB, Losick R. 2005. Cell population heterogeneity during growth of *Bacillus*  
803 *subtilis*. *Genes Dev* 19:3083–3094.
- 804 56. Yasumura A, Abe S, Tanaka T. 2008. Involvement of nitrogen regulation in *Bacillus*  
805 *subtilis* degU expression. *J Bacteriol* 190:5162–5171.
- 806 57. Ogura M, Tsukahara K. 2010. Autoregulation of the *Bacillus subtilis* response  
807 regulator gene degU is coupled with the proteolysis of DegU-P by ClpCP. *Mol*  
808 *Microbiol* 75:1244–1259.

- 809 58. Dartois V, Débarbouillé M, Kunst F, Rapoport G. 1998. Characterization of a novel  
810 member of the DegS-DegU regulon affected by salt stress in *Bacillus subtilis*. *J*  
811 *Bacteriol* 180:1855–1861.
- 812 59. Hong HA, Khaneja R, Tam NMK, Cazzato A, Tan S, Urdaci M, Brisson A,  
813 Gasbarrini A, Barnes I, Cutting SM. 2009. *Bacillus subtilis* isolated from the human  
814 gastrointestinal tract. *Res Microbiol* 160:134–143.
- 815 60. Barbosa TM, Serra CR, La Ragione RM, Woodward MJ, Henriques AO. 2005.  
816 Screening for bacillus isolates in the broiler gastrointestinal tract. *Appl Environ*  
817 *Microbiol* 71:968–978.
- 818 61. Duc LH, Hong HA, Barbosa TM, Henriques AO, Cutting SM. 2004.  
819 Characterization of *Bacillus* probiotics available for human use. *Appl Environ*  
820 *Microbiol* 70:2161–2171.
- 821 62. Tam NKM, Uyen NQ, Hong HA, Duc LH, Hoa TT, Serra CR, Henriques AO, Cutting  
822 SM. 2006. The intestinal life cycle of *Bacillus subtilis* and close relatives. *J Bacteriol*  
823 188:2692–2700.
- 824 63. Ishii H, Tanaka T, Ogura M. 2013. The *Bacillus subtilis* response regulator gene  
825 *degU* is positively regulated by CcpA and by catabolite-repressed synthesis of  
826 ClpC. *J Bacteriol* 195:193–201.
- 827 64. Hutchison EA, Miller DA, Angert ER. 2014. Sporulation in Bacteria: Beyond the  
828 Standard Model. *Microbiol Spectr* 2.



- 829 65. Chase DG, Erlandsen SL. 1976. Evidence for a complex life cycle and endospore  
830 formation in the attached, filamentous, segmented bacterium from murine ileum. J  
831 Bacteriol 127:572–583.
- 832 66. Browne HP, Forster SC, Anonye BO, Kumar N, Neville BA, Stares MD, Goulding  
833 D, Lawley TD. 2016. Culturing of ‘unculturable’ human microbiota reveals novel  
834 taxa and extensive sporulation. Nature 533:543–546.
- 835 67. Forster SC, Kumar N, Anonye BO, Almeida A, Viciani E, Stares MD, Dunn M,  
836 Mkandawire TT, Zhu A, Shao Y, Pike LJ, Louie T, Browne HP, Mitchell AL, Neville  
837 BA, Finn RD, Lawley TD. 2019. A human gut bacterial genome and culture  
838 collection for improved metagenomic analyses. Nat Biotechnol 37:186–192.
- 839 68. Lawley TD, Clare S, Walker AW, Goulding D, Stabler RA, Croucher N, Mastroeni  
840 P, Scott P, Raisen C, Mottram L, Fairweather NF, Wren BW, Parkhill J, Dougan G.  
841 2009. Antibiotic treatment of clostridium difficile carrier mice triggers a  
842 supershedder state, spore-mediated transmission, and severe disease in  
843 immunocompromised hosts. Infect Immun 77:3661–3669.
- 844 69. Henriques AO, Moran CP. 2007. Structure, assembly, and function of the spore  
845 surface layers. Annu Rev Microbiol 61:555–588.
- 846 70. Marlow VL, Cianfanelli FR, Porter M, Cairns LS, Dale JK, Stanley-Wall NR. 2014.  
847 The prevalence and origin of exoprotease-producing cells in the Bacillus subtilis  
848 biofilm. Microbiology (Reading, Engl) 160:56–66.

- 849 71. Urushibata Y, Tokuyama S, Tahara Y. 2002. Difference in transcription levels of  
850 cap genes for gamma-polyglutamic acid production between *Bacillus subtilis* IFO  
851 16449 and Marburg 168. *J Biosci Bioeng* 93:252–254.
- 852 72. Barrick JE, Lenski RE. 2013. Genome dynamics during experimental evolution. *Nat*  
853 *Rev Genet* 14:827–839.
- 854 73. Davidson CJ, White AP, Surette MG. 2008. Evolutionary loss of the *rdar*  
855 morphotype in *Salmonella* as a result of high mutation rates during laboratory  
856 passage. *ISME J* 2:293–307.
- 857 74. Caetano T, Süssmuth RD, Mendo S. 2015. Impact of domestication in the  
858 production of the class II lanthipeptide lichenicidin by *Bacillus licheniformis* I89.  
859 *Curr Microbiol* 70:364–368.
- 860 75. Berditsch M, Afonin S, Ulrich AS. 2007. The ability of *Aneurinibacillus migulanus*  
861 (*Bacillus brevis*) to produce the antibiotic gramicidin S is correlated with phenotype  
862 variation. *Appl Environ Microbiol* 73:6620–6628.
- 863 76. Velicer GJ, Kroos L, Lenski RE. 1998. Loss of social behaviors by *myxococcus*  
864 *xanthus* during evolution in an unstructured habitat. *Proc Natl Acad Sci USA*  
865 95:12376–12380.
- 866 77. Baikalov I, Schröder I, Kaczor-Grzeskowiak M, Grzeskowiak K, Gunsalus RP,  
867 Dickerson RE. 1996. Structure of the *Escherichia coli* response regulator NarL.  
868 *Biochemistry* 35:11053–11061.

- 869 78. Maris AE, Kaczor-Grzeskowiak M, Ma Z, Kopka ML, Gunsalus RP, Dickerson RE.  
870 2005. Primary and secondary modes of DNA recognition by the NarL two-  
871 component response regulator. *Biochemistry* 44:14538–14552.
- 872 79. Eglund KA, Greenberg EP. 2001. Quorum sensing in *Vibrio fischeri*: analysis of the  
873 LuxR DNA binding region by alanine-scanning mutagenesis. *J Bacteriol* 183:382–  
874 386.
- 875 80. Ryall B, Eydallin G, Ferenci T. 2012. Culture history and population heterogeneity  
876 as determinants of bacterial adaptation: the adaptomics of a single environmental  
877 transition. *Microbiol Mol Biol Rev* 76:597–625.
- 878 81. Saxer G, Krepps MD, Merkley ED, Ansong C, Deatherage Kaiser BL, Valovska M-  
879 T, Ristic N, Yeh PT, Prakash VP, Leiser OP, Nakhleh L, Gibbons HS, Kreuzer HW,  
880 Shamoo Y. 2014. Mutations in global regulators lead to metabolic selection during  
881 adaptation to complex environments. *PLoS Genet* 10:e1004872.
- 882 82. Levin BR. 1996. The evolution and maintenance of virulence in microparasites.  
883 *Emerging Infect Dis* 2:93–102.
- 884 83. Adiba S, Nizak C, van Baalen M, Denamur E, Depaulis F. 2010. From grazing  
885 resistance to pathogenesis: the coincidental evolution of virulence factors. *PLoS*  
886 *ONE* 5:e11882.
- 887 84. Elshaghabe FMF, Rokana N, Gulhane RD, Sharma C, Panwar H. 2017. *Bacillus*  
888 *As Potential Probiotics: Status, Concerns, and Future Perspectives. Front Microbiol*  
889 8:1490.

- 890 85. Permpoonpattana P, Hong HA, Khaneja R, Cutting SM. 2012. Evaluation of  
891 *Bacillus subtilis* strains as probiotics and their potential as a food ingredient. *Benef*  
892 *Microbes* 3:127–135.
- 893 86. Xu X, Huang Q, Mao Y, Cui Z, Li Y, Huang Y, Rajput IR, Yu D, Li W. 2012.  
894 Immunomodulatory effects of *Bacillus subtilis* (natto) B4 spores on murine  
895 macrophages. *Microbiol Immunol* 56:817–824.
- 896 87. Paynich ML, Jones-Burrage SE, Knight KL. 2017. Exopolysaccharide from *Bacillus*  
897 *subtilis* Induces Anti-Inflammatory M2 Macrophages That Prevent T Cell-Mediated  
898 Disease. *J Immunol* 198:2689–2698.
- 899 88. Duc LH, Hong HA, Uyen NQ, Cutting SM. 2004. Intracellular fate and  
900 immunogenicity of *B. subtilis* spores. *Vaccine* 22:1873–1885.
- 901 89. Jung J-Y, Shin J-S, Rhee YK, Cho C-W, Lee M-K, Hong H-D, Lee K-T. 2015. In  
902 vitro and in vivo immunostimulatory activity of an exopolysaccharide-enriched  
903 fraction from *Bacillus subtilis*. *J Appl Microbiol* 118:739–752.
- 904 90. Deatherage DE, Barrick JE. 2014. Identification of mutations in laboratory-evolved  
905 microbes from next-generation sequencing data using breseq. *Methods Mol Biol*  
906 1151:165–188.
- 907 91. Schyns G, Serra CR, Lapointe T, Pereira-Leal JB, Potot S, Fickers P, Perkins JB,  
908 Wyss M, Henriques AO. 2013. Genome of a Gut Strain of *Bacillus subtilis*. *Genome*  
909 *Announc* 1.

- 910 92. Robinson JT, Thorvaldsdóttir H, Winckler W, Guttman M, Lander ES, Getz G,  
911 Mesirov JP. 2011. Integrative genomics viewer. *Nat Biotechnol* 29:24–26.
- 912 93. Miskinyte M, Sousa A, Ramiro RS, de Sousa JAM, Kotlinowski J, Caramalho I,  
913 Magalhães S, Soares MP, Gordo I. 2013. The genetic basis of *Escherichia coli*  
914 pathoadaptation to macrophages. *PLoS Pathog* 9:e1003802.
- 915 94. Yasbin RE, Young FE. 1974. Transduction in *Bacillus subtilis* by bacteriophage  
916 SPP1. *J Virol* 14:1343–1348.
- 917 95. São-José C, Baptista C, Santos MA. 2004. *Bacillus subtilis* operon encoding a  
918 membrane receptor for bacteriophage SPP1. *J Bacteriol* 186:8337–8346.
- 919 96. Saran S, Isar J, Saxena RK. 2007. A modified method for the detection of microbial  
920 proteases on agar plates using tannic acid. *J Biochem Biophys Methods* 70:697–  
921 699.
- 922 97. Branda SS, Chu F, Kearns DB, Losick R, Kolter R. 2006. A major protein  
923 component of the *Bacillus subtilis* biofilm matrix. *Mol Microbiol* 59:1229–1238.
- 924 98. Morikawa M, Kagihiro S, Haruki M, Takano K, Branda S, Kolter R, Kanaya S. 2006.  
925 Biofilm formation by a *Bacillus subtilis* strain that produces gamma-polyglutamate.  
926 *Microbiology (Reading, Engl)* 152:2801–2807.
- 927 99. Hata M, Ogura M, Tanaka T. 2001. Involvement of stringent factor RelA in  
928 expression of the alkaline protease gene *aprE* in *Bacillus subtilis*. *J Bacteriol*  
929 183:4648–4651.



## 931 **Figure legends**

932 **FIG 1 Changes in colony morphology with domestication.** (A) Representative image  
933 of the Ancestral colony morphology and of the three different types of colony  
934 morphology, *a*, *b* and *c*, observed at the eight and sixteen day of the domestication  
935 experiment in the five evolved populations; (B) Frequency of each morphotype in the  
936 five populations at day 8; (C) Frequency of morphotype *b* in population 1 along time.  
937 The scale bar represents 1 cm and applies to all panels.

938 **FIG 2 Domestication is accompanied by mutations in *degU*.** (A) *degU* region of the  
939 *B. subtilis* chromosome (top) and domain organization of the DegU protein (bottom).  
940 The position of the various mutations found and the corresponding amino acid  
941 substitution is indicated. (B) Model of the full-length DegU protein of *B. subtilis* obtained  
942 by comparative modeling and using the crystal structure of the LiaR protein from  
943 *Enterococcus faecalis* as the template (PDB code: 5hev). The protein is thought to form  
944 a dimer and the two monomers are represented in blue and light brown, with the  
945 position of the receiver and DNA-binding domains indicated. The red arrows indicate the  
946 location of the single amino acid substitutions found in DegU. *a* and *b*, show a  
947 magnification of the regions encompassing the V131D (*a*) and I186M and H200Y (*b*)  
948 substitutions. In *b*, the region of the helix-turn-helix (HTH) motif is modeled with DNA, to  
949 highlight the likely involvement of residues I186 and H200 in DNA binding. The HTH  
950 motif was independently modeled using the crystal structure of the LiaR DNA-binding  
951 domain as the template (PDB code: 4wuh). (C) Representative images showing the  
952 complex biofilm morphology of Ancestral and clones representative of each population

953 after 16 days of domestication. In red are indicated the mutation in DegU present in  
954 each clone. All strains were incubated in MSgg for 96h at 28°C. Scale bar, 1 cm.

955 **FIG 3 *degU*<sup>Evo</sup> is responsible for the alteration in swarming motility and colony**  
956 **architecture.** (A) Swarming motility assay of Ancestral, Evolved, *degU*<sup>Anc</sup>, *degU*<sup>Evo</sup>,  
957  $\Delta degU$ , and Lab. LB plates fortified with 0.7% of agar were inoculated incubated for 16h  
958 at 28°C. Swarm expansion, resulting from bacterial growth, appears in white, whereas  
959 uncolonized agar appears in black. (B) Representative images showing the complex  
960 colony architecture development along with the indicated time points of the Ancestral  
961 and Evolved. The strains were grown in MSgg medium at 28°C. (C) Representative  
962 images showing the complex colony architecture of the indicated strains on MSgg agar  
963 plates incubated for 96h at 28°C. Scale bars, 1 cm.

964 **FIG 4 *degU*<sup>Evo</sup> is responsible for the alteration in biofilm complexity, exoprotease**  
965 **secretion, phage resistance and the pattern of gene expression during biofilm**  
966 **formation.** (A) Quantification by the crystal violet method of the biofilms formed by the  
967 Ancestral (n = 18 for 24h, n = 15 for 48h), Evolved (n = 22 for 24h, n = 15 for 48h),  
968 *degU*<sup>Anc</sup> (n = 18 for 24h, n = 19 for 48h), and *degU*<sup>Evo</sup> (n = 19 for 24h, n = 18 for 48h) in  
969 MSgg broth incubated at 25°C for the indicated time points. For the statistics the Mann-  
970 Whitney U test was used. For \*\*\*\*, p<0.0001. (B) Dimension of the halos produced by  
971 the Ancestral (n = 4), Evolved (n = 4), *degU*<sup>Anc</sup> (n = 3), *degU*<sup>Evo</sup> (n = 3), and  $\Delta degU$  (n =  
972 4) in LB fortified with 1.5 % agar and supplemented with 2% of skimmed milk incubated  
973 at 37°C for 48h. For the statistics an unpaired t-test with Welch's correction was used.  
974 For \*\*\*\*, p<0.0001, for \*\*\*, p=0.007. The error bar represents the standard deviation. (C)  
975 Efficiency of Plating (EOP) shown in white numbers in the superior right corner for the



976 Ancestral, Evolved, *degU*<sup>Anc</sup>, *degU*<sup>Evo</sup>,  $\Delta$ *degU* using as a reference the indicator strain  
977 Lab (PY79), which is phage sensitive. The number of plaque forming units (PFU's) is  
978 shown in the superior left corner in white numbers. The yellow arrows indicate SPP1  
979 phage plaques. Note that Ancestral is sensitive to SPP1 but the plaque size is reduced  
980 when compared with the Lab strain, while the Evolved is resistant. Scale bars, 1 cm. (D)  
981 Representative images of the expression of transcriptional fusions between the *aprE*,  
982 *bsIA*, *hag* and *degU* promoter regions and *gfp* in Ancestral, Evolved, and Lab after 96h  
983 of incubation in MSgg at 28°C. Scale bar, 1 cm. In panel A and B the error bars  
984 represent the standard deviation.

985 **FIG 5 *degU*<sup>Evo</sup> alters the pattern of gene expression at the single-cell level.** (A)  
986 Representative images of the expression of *hag*-, *bsIA*-, *aprE*- and *degU-gfp*  
987 transcriptional fusions in Ancestral, Evolved, and Lab one hour after the onset of  
988 stationary phase in LB. The cultures were grown with agitation at 37°C. Scale bar, 1  $\mu$ m.  
989 (B) Relative frequency of expression of transcriptional fusions of the indicated  
990 promoters to *gfp* in the same conditions as above. For the relative frequency of  
991 expression of transcriptional fusions in free cells, a total of 371 (*hag-gfp*), 453 (*bsIA*-  
992 *gfp*), 713 (*aprE-gfp*), and 561 (*degU-gfp*) cells from Ancestral, Evolved and Lab were  
993 analysed. For the relative frequency of expression of transcriptional fusions in chains, a  
994 total of 150 (*hag-gfp*), 79 (*bsIA-gfp*), 168 (*aprE-gfp*), and 191 (*degU-gfp*) cells from  
995 Ancestral, Evolved and Lab were analysed.

996 **FIG 6 *degU*<sup>Evo</sup> increases survival in the presence of macrophages and changes**  
997 **sporulation efficiency in an environment-dependent manner.** (A) Macrophages  
998 were infected with Ancestral (n = 9) and Evolved (n = 9) and colony-forming units of

999 both the intracellular and extracellular bacteria obtained by plating at the indicated time  
1000 points. For the statistics the Unpaired t test with Welch's correction was used. \*\*\*p =  
1001 0.001, \*\*\*\*p < 0.0001 The error bar represents the standard deviation. (B) Comparison  
1002 of the sporulation efficiency in RPMI medium between Ancestral (n = 11), Evolved (n =  
1003 11), *degU<sup>Anc</sup>* (n = 10) and *degU<sup>Evo</sup>* (n = 8). The efficiency of sporulation was calculated  
1004 as the ratio between the heat resistant spore counts and total (viable) cells. The dashed  
1005 line indicates the average sporulation efficiency for the Ancestral in LB. For the statistics  
1006 an ANOVA and Tukey's multiple comparison test was used. For \*\*\*\*, p<0.0001. (C)  
1007 Accumulation of DegU in Ancestral, Evolved, *degU<sup>Anc</sup>*, *degU<sup>Evo</sup>* and the *degU* insertional  
1008 mutant in RPMI. (D) Comparison of the sporulation efficiency and variance in LB  
1009 between Ancestral (n = 31), Evolved (n = 21), *degU<sup>Anc</sup>* (n = 8), *degU<sup>Evo</sup>* (n = 10), Lab (n  
1010 = 10) and three other commonly used laboratory strains (MB24, n = 10, JH642, n = 10,  
1011 and 168, n = 10). For the mean sporulation efficiency an ANOVA and Tukey's multiple  
1012 comparison test was used. For the variance the F-test was used. For \*\*\*, p=0.0002. (E)  
1013 The levels of DegU are similar between Ancestral and Evolved in LB. Accumulation of  
1014 DegU in Ancestral, Evolved, *degU<sup>Anc</sup>*, *degU<sup>Evo</sup>*, and the *degU* insertional mutant. In (C)  
1015 and (E), the cells were collected after growth in RPMI (C) or LB (E) and whole-cell  
1016 lysates prepared (see Methods). Proteins (20 µg) in whole-cell lysates were resolved by  
1017 SDS-PAGE and subject to immunoblot analysis with an anti-DegU antibody. The arrow  
1018 shows the position of DegU; the red arrows indicate slightly higher levels of DegU. The  
1019 panel below the immunoblot shows part of a Coomassie-stained gel, run in parallel, as a  
1020 loading control. The position of molecular weight markers (in kDa) is shown on the left  
1021 side of the panels. In panels B and D the red line indicates the mean.

**A**

Ancestral

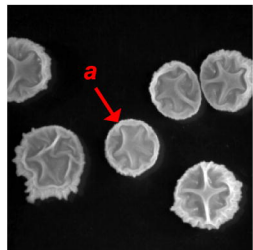**B**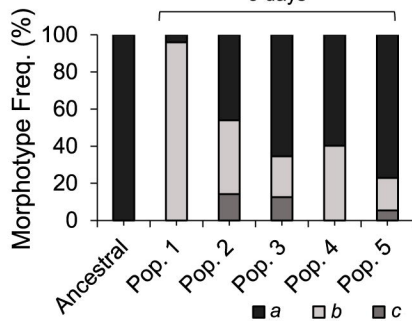**C**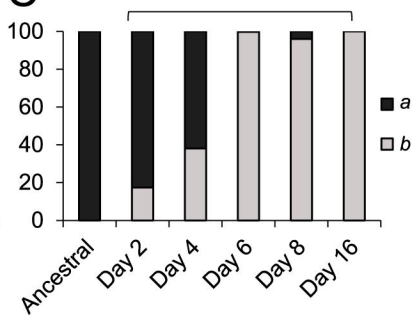

Pop. 1

Pop. 2

Pop. 3

Pop. 4

Pop. 5

8 days

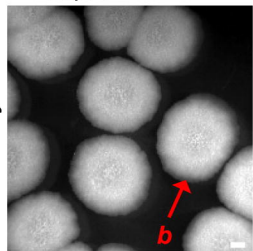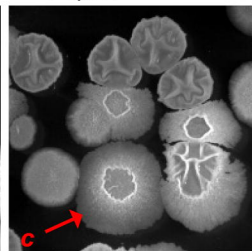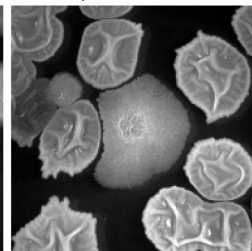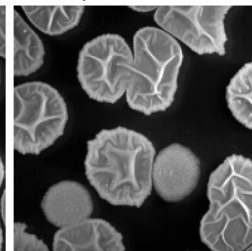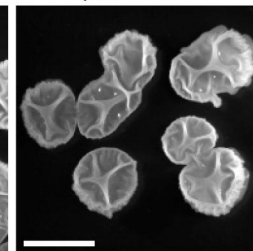

16 days

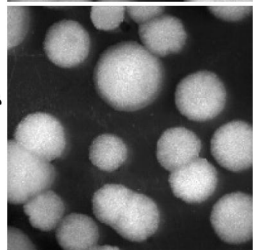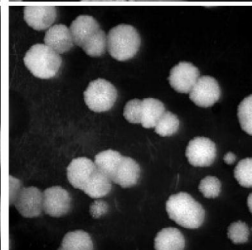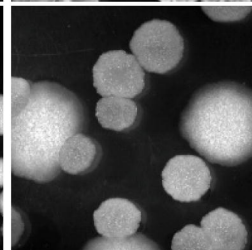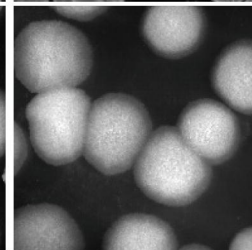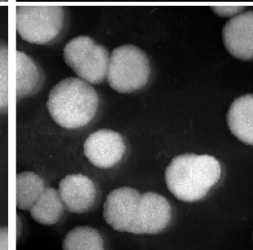

**A**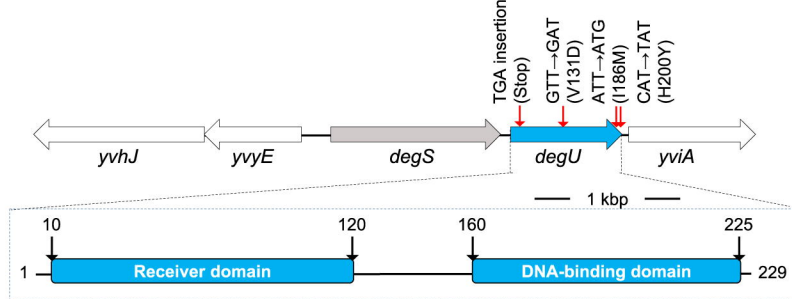**B**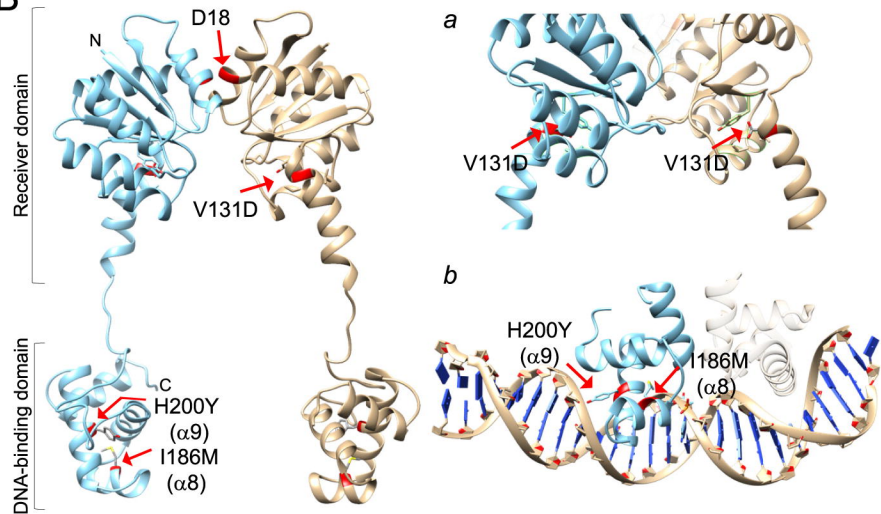**C**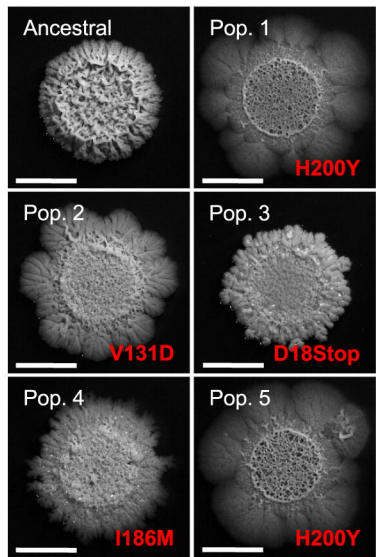

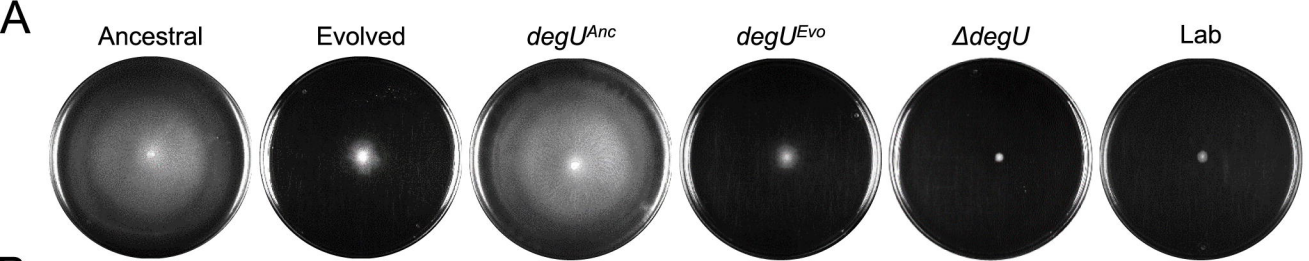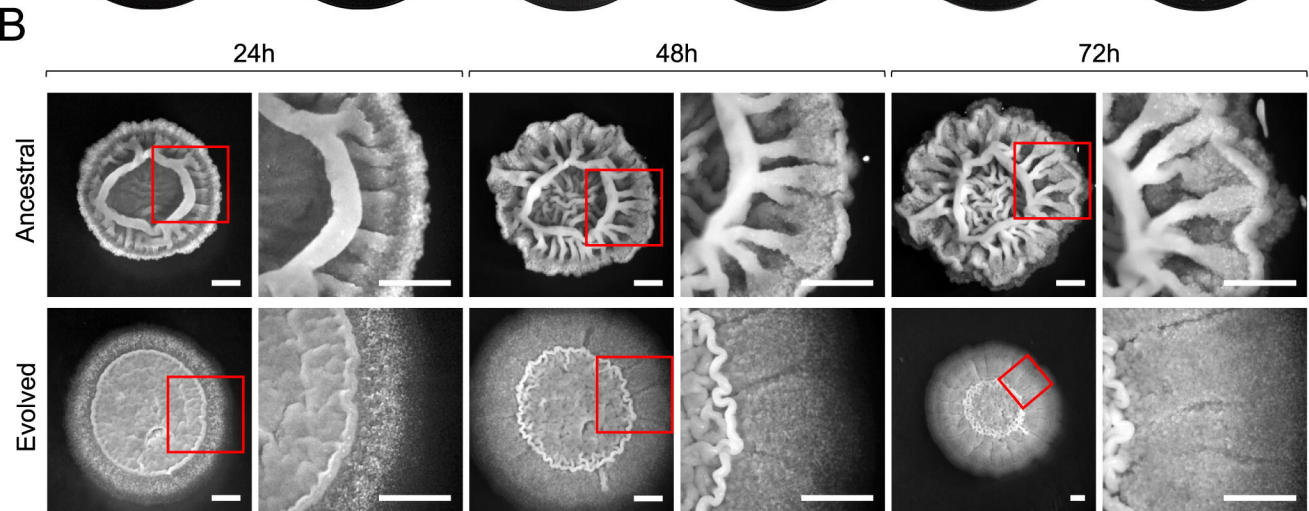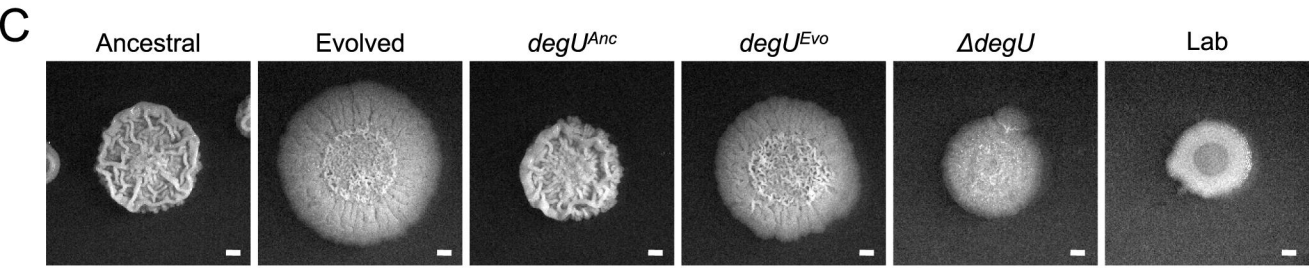

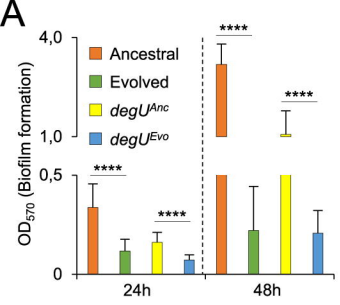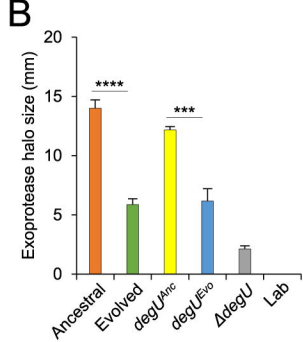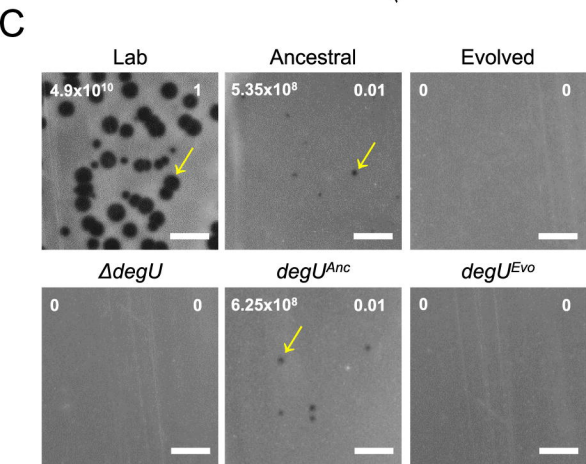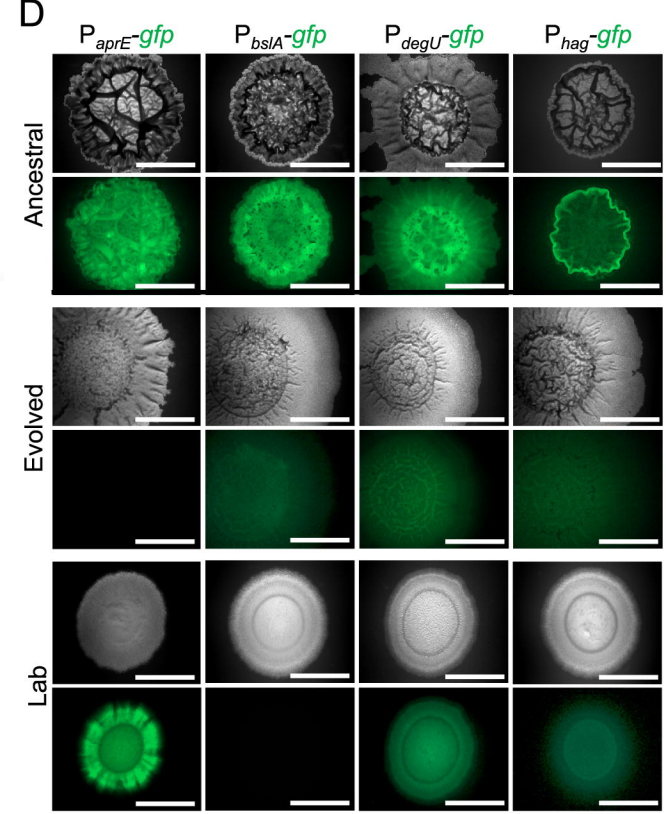

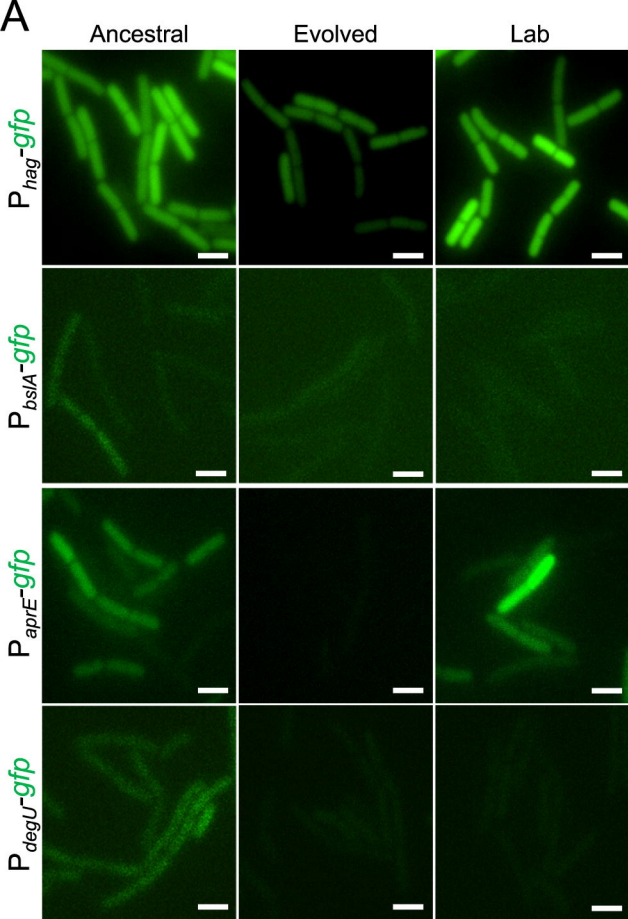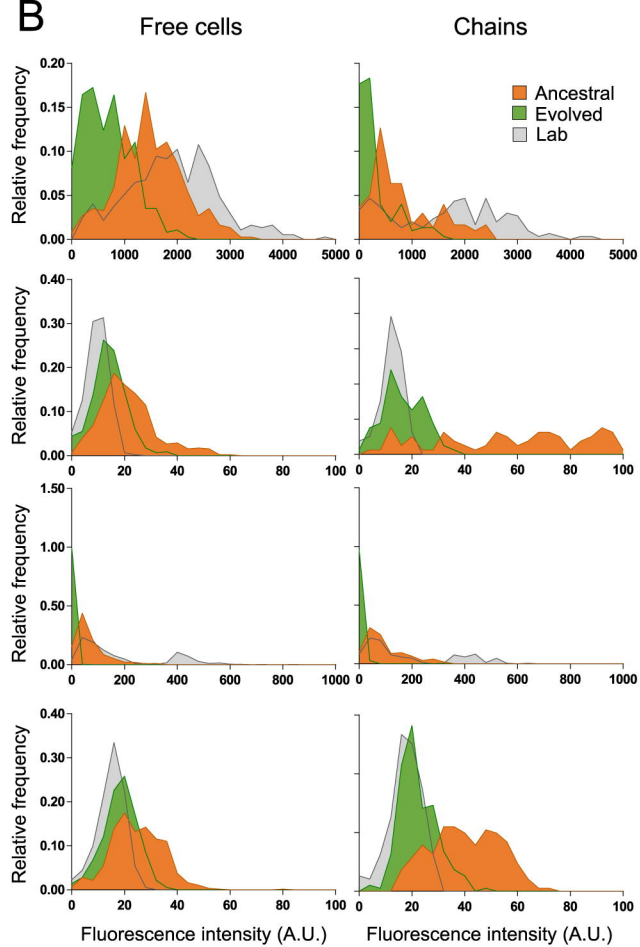

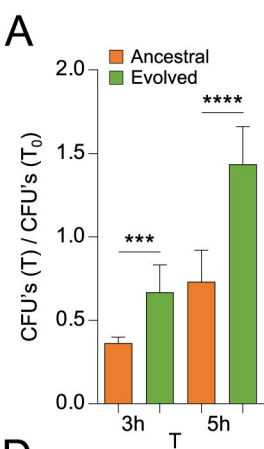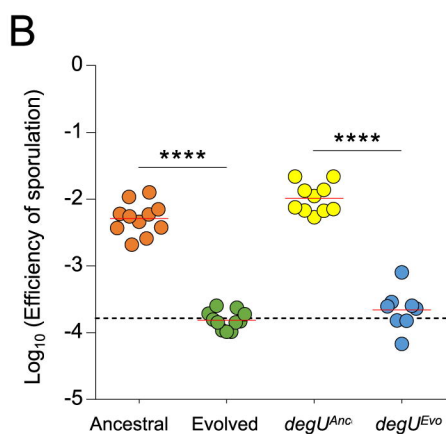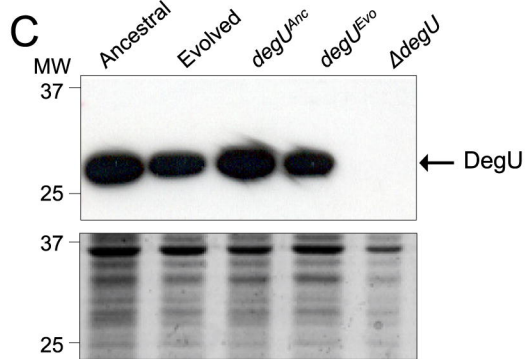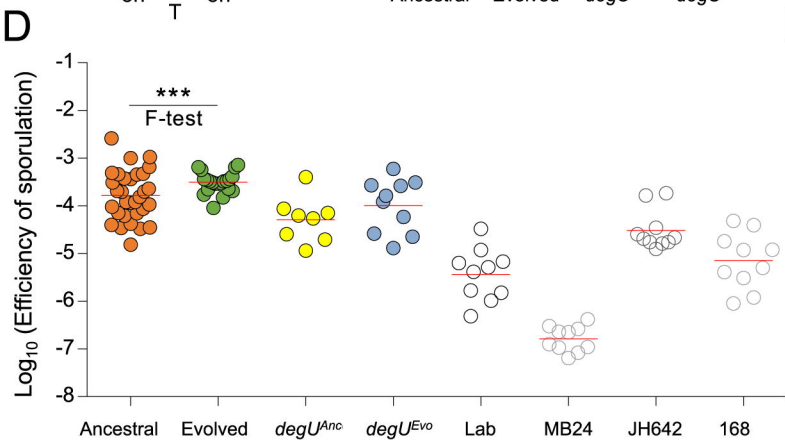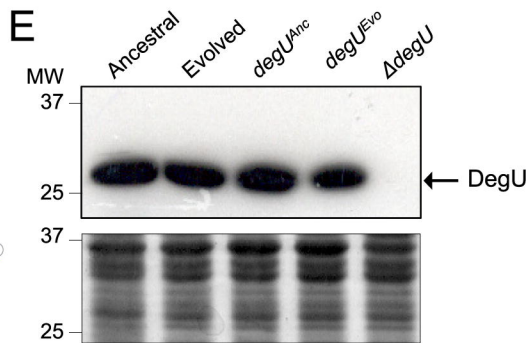

Source: https://www.biorxiv.org/content/10.1101/751438v2.full.pdf
